# Supplementary material for: High-throughput extraction and quantification method for targeted metabolomics in murine tissues
Source: PubMed Central journal article supplement (PMC5748028; doi:10.1007/s11306-017-1312-x), 2017-12-30
Supplement: 11306_2017_1312_MOESM1_ESM.pdf [file 11306_2017_1312_MOESM1_ESM.pdf]

## High-throughput extraction and quantification method for targeted metabolomics in murine tissues

Sven Zukunft<sup>1,2</sup>, Cornelia Prehn<sup>1</sup>, Cornelia Röhring<sup>3</sup>, Gabriele Möller<sup>1</sup>, Martin Hrabě de Angelis<sup>1,2,4</sup>, Jerzy Adamski<sup>1,2,4</sup>, and Janina Tokarz<sup>1\*</sup>

<sup>1</sup> Helmholtz Zentrum München, German Research Center for Environmental Health, Institute of Experimental Genetics, Genome Analysis Center, Ingolstaedter Landstrasse 1, 85764 Neuherberg, Germany

<sup>2</sup> German Center for Diabetes Research (DZD), 85764 Neuherberg, Germany

<sup>3</sup> Biocrates Life Sciences AG, Eduard-Bodem-Gasse 8, A-6020 Innsbruck, Austria

<sup>4</sup> Lehrstuhl für Experimentelle Genetik, Technische Universität München, 85350 Freising-Weihenstephan, Germany

\* Corresponding author: Janina Tokarz, Helmholtz Zentrum München, German Research Center for Environmental Health, Institute of Experimental Genetics, Genome Analysis Center, Ingolstaedter Landstrasse 1, 85764 Neuherberg, Germany

Voice: +49-89-3187-3233, Fax: +49-89-3187-3225, E-mail: janina.tokarz@helmholtz-muenchen.de

### Table of Contents

|                   |                                                                                                                                         |           |
|-------------------|-----------------------------------------------------------------------------------------------------------------------------------------|-----------|
| <b>Fig. S-1</b>   | Influence of the extraction solvent and the tissue to solvent ratio on metabolite concentrations in different mouse tissues.            | Page S-2  |
| <b>Fig. S-2</b>   | Comparison of matrix effects of murine tissue extracts to matrix effects of human plasma.                                               | Page S-7  |
| <b>Table S-1</b>  | List of analyzed metabolites with their abbreviations, names, metabolite classes, HMDB IDs, and MSI level of metabolite identification. | Page S-8  |
| <b>Table S-2</b>  | Tissue metabolite concentrations measured at optimal extraction conditions.                                                             | Page S-31 |
| <b>References</b> |                                                                                                                                         | Page S-37 |

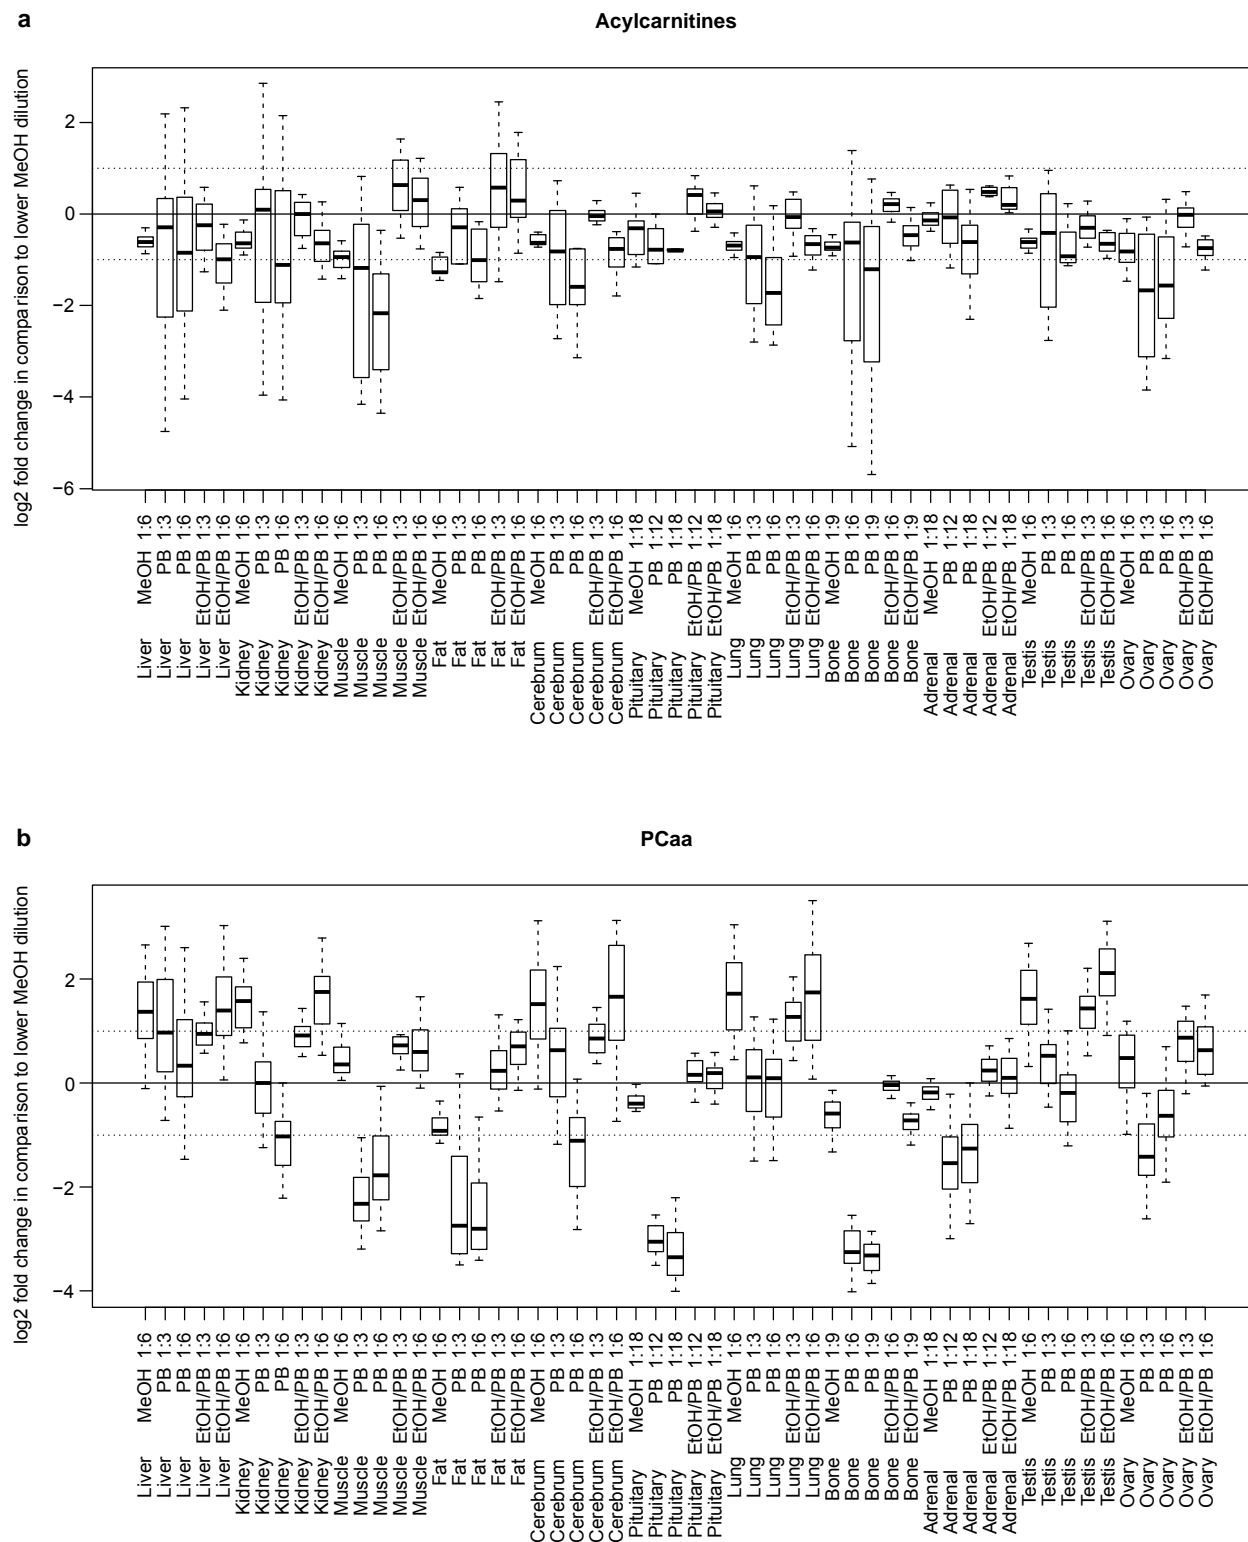

**Fig. S-1**

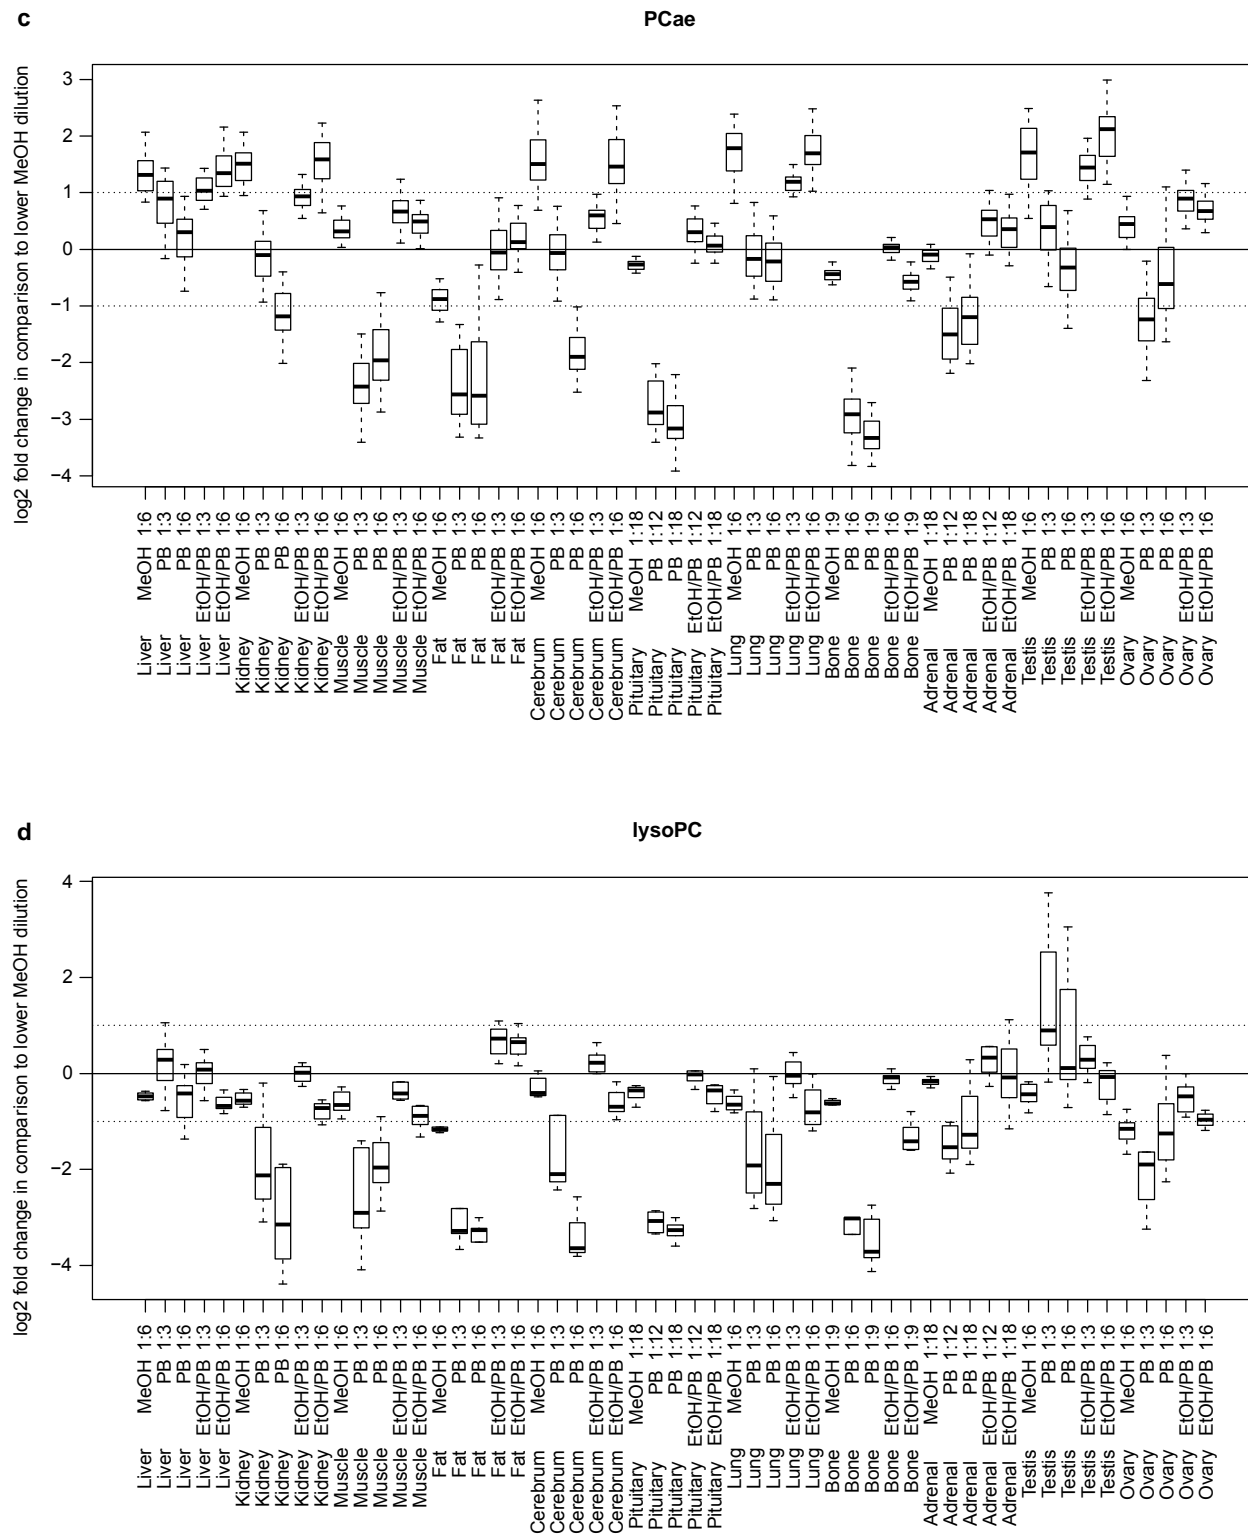

Fig. S-1 (continued)

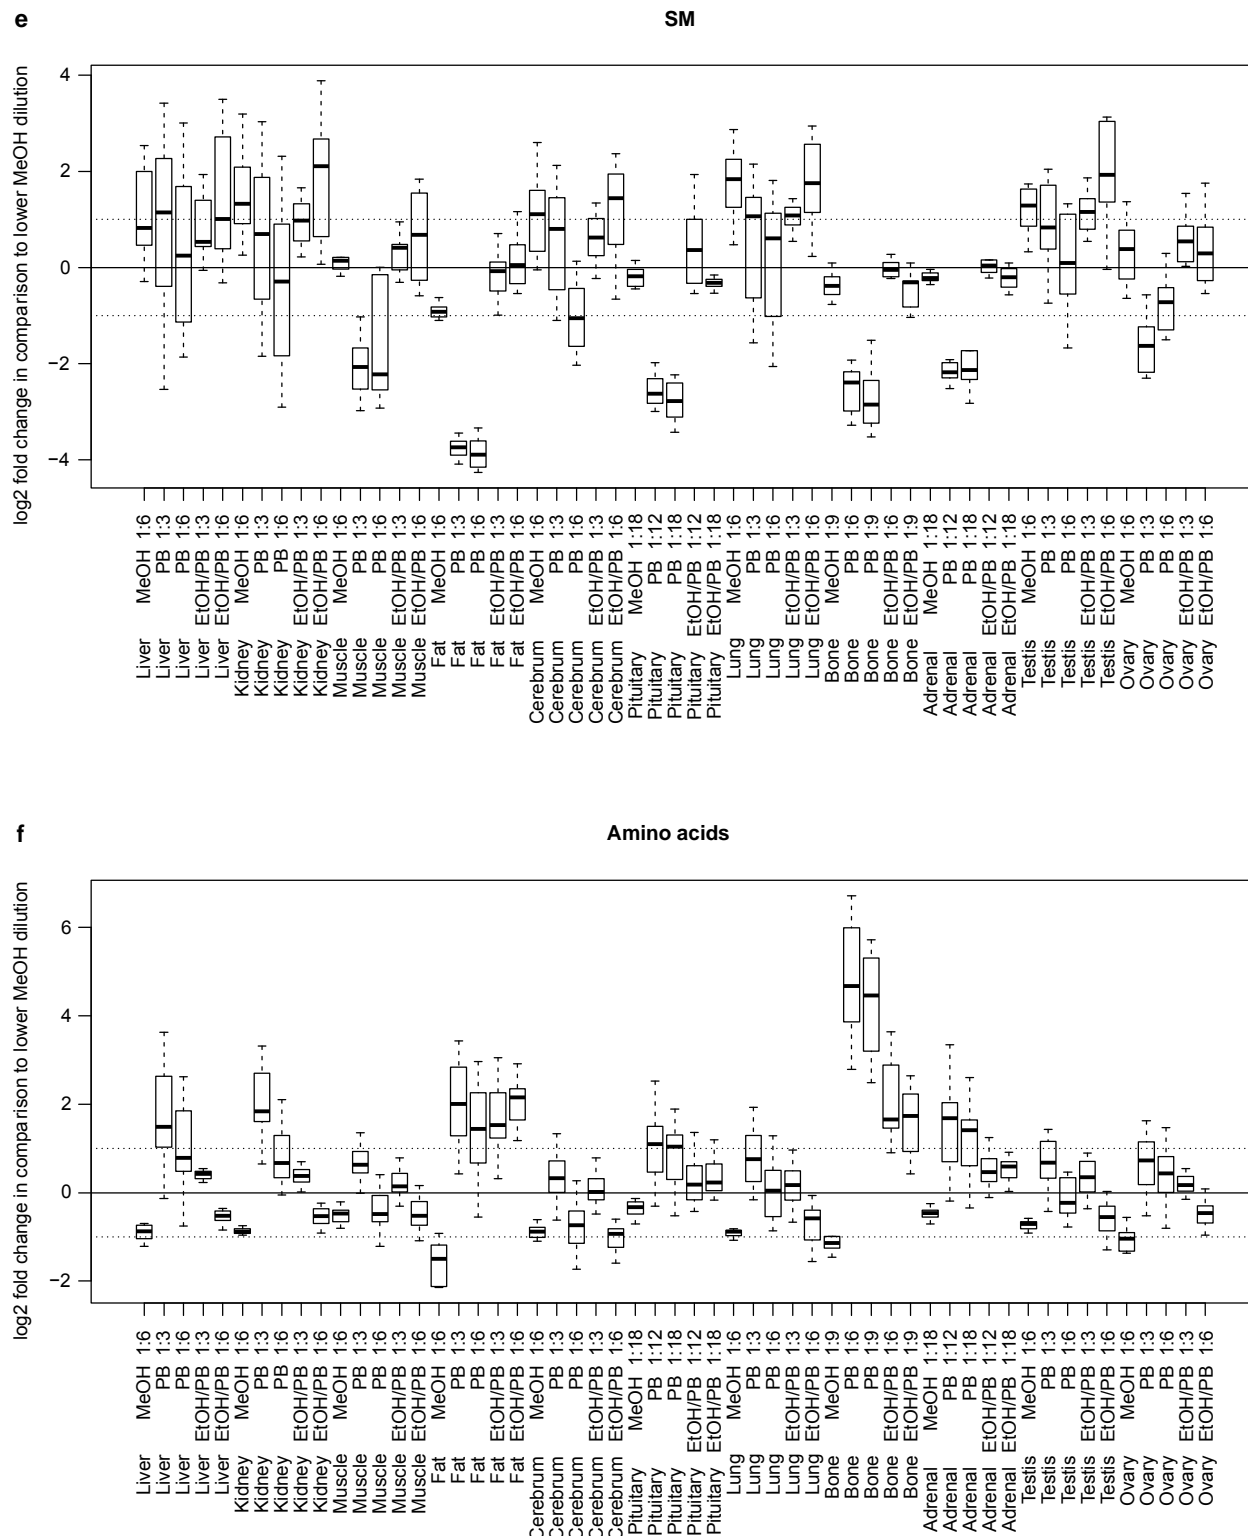

**Fig. S-1** (continued)

g

Biogenic amines

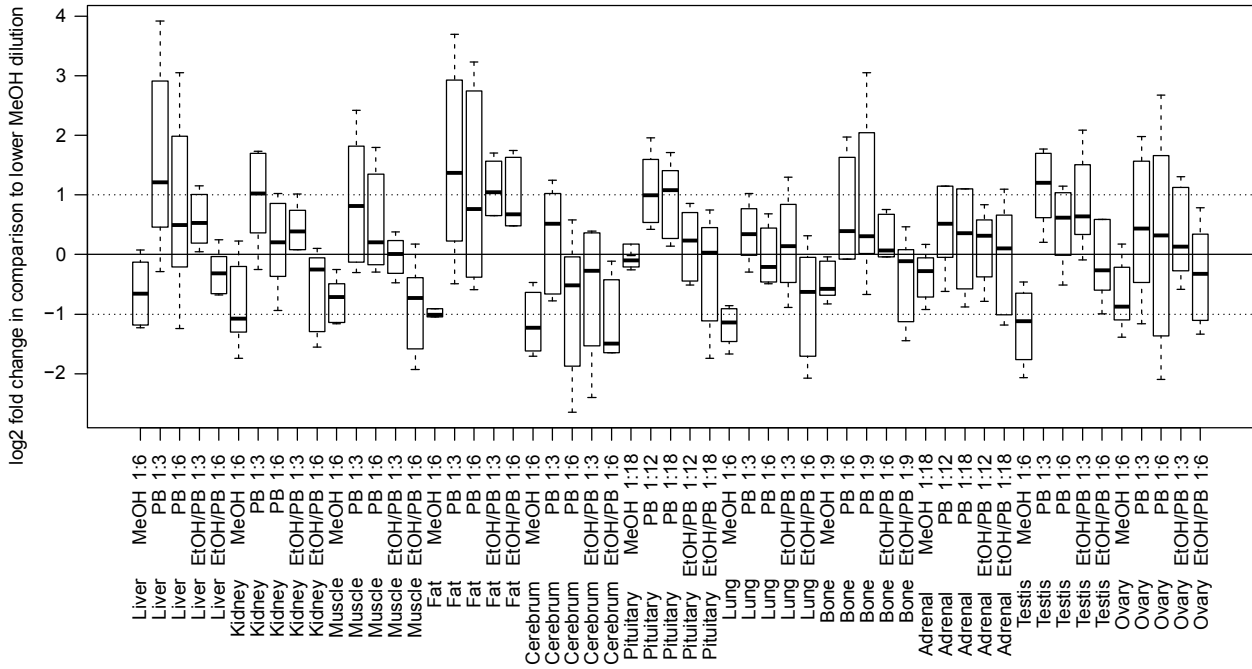

h

Hexoses

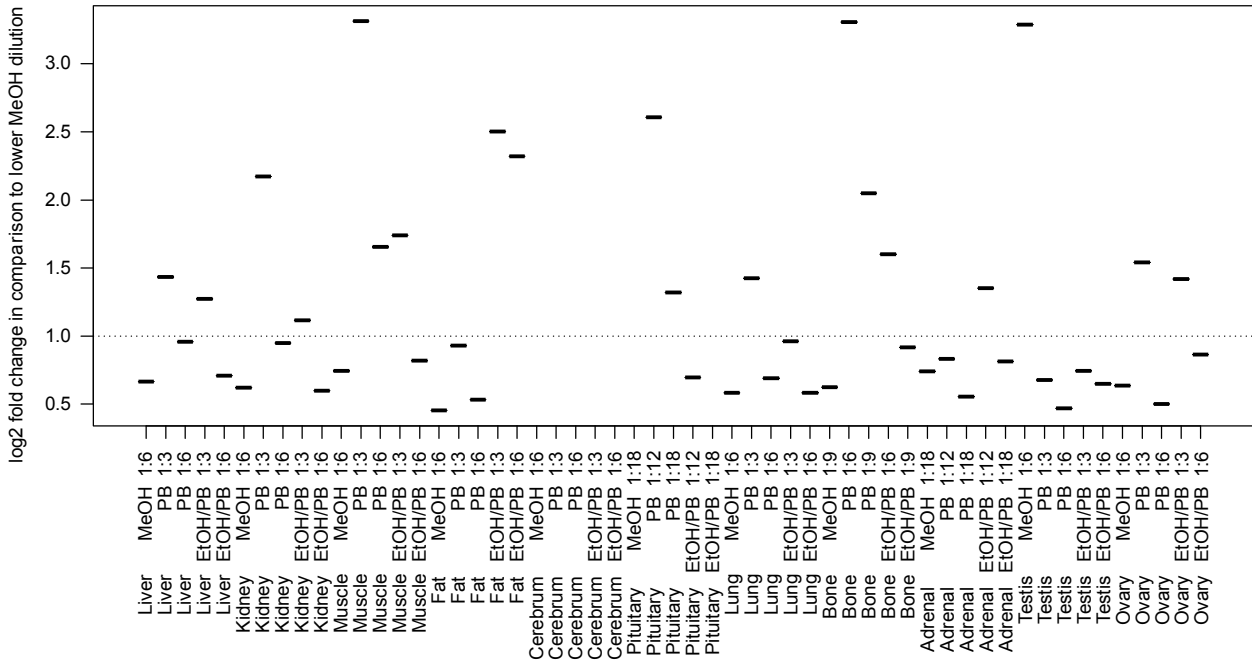

Fig. S-1 (continued)

**Fig. S-1      Influence of the extraction solvent and the tissue to solvent ratio on metabolite concentrations in different mouse tissues.**

This figure presents the detailed data for Fig. 2 in the manuscript. Log<sub>2</sub> fold changes were calculated for each tissue type and each metabolite class in relation to the concentrations obtained for MeOH in the respective lower tissue to solvent ratio. The fold change of the lower tissue to solvent ratio using MeOH compared to itself (fold change 0) for every tissue and metabolite class is not presented in the figure (which is in contrast to Fig. 2 in the manuscript). The figure presents the median, the 25% quartile, and the 75% quartile values for 5-6 replicates per tissue for all metabolite classes, namely for acylcarnitines (a), acyl/acyl phosphatidylcholines (PCaa, b), acyl/alkyl phosphatidylcholines (PCae, c), lyso-phosphatidylcholines (lysoPC, d), sphingomyelins (SM, e), amino acids (f), biogenic amines (g), and the sum of hexoses (h). Missing boxes indicate that the evaluation was not possible due to metabolite concentrations below the LOD. Abbreviations for extraction solvents are as follows: MeOH, 100% methanol; PB, 10 mM phosphate buffer pH 7.5; EtOH/PB, 85/15 (v/v) mixture of ethanol and 10 mM phosphate buffer pH 7.5. Tissue to solvent ratios are denoted as 1:X, indicating 1 mg of tissue was homogenized with X  $\mu$ L solvent.

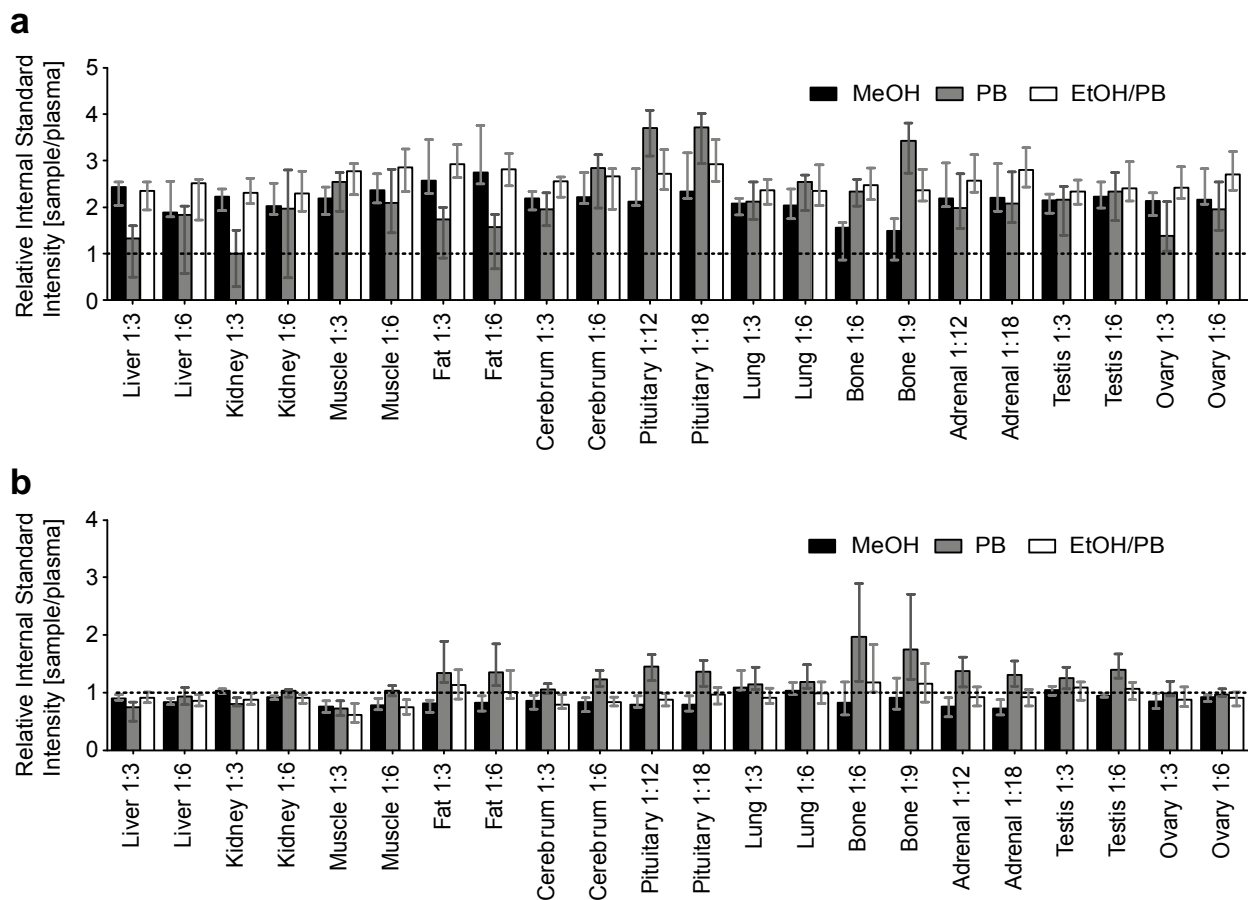

**Fig. S-2 Comparison of matrix effects of murine tissue extracts to matrix effects of human plasma.**

To determine whether the matrix effects of murine tissue extracts are comparable to the matrix effects of human plasma, we calculated the ratio of the Internal Standard intensity of all tissue extracts (5-6 replicates per tissue and extraction condition) to the Internal Standard intensity of nine human reference plasma samples. Values larger than 1 indicate less ion suppression and values smaller than 1 indicate more ion suppression in tissue samples compared to human plasma. The figure presents the median, the 20% quantile, and the 80% quantile values for all metabolites measured by FIA-MS/MS (lipids, hexoses) (a), or LC-MS/MS (amino acids, biogenic amines) (b). Abbreviations for extraction solvents are as follows: MeOH, 100% methanol; PB, 10 mM phosphate buffer pH 7.5; EtOH/PB, 85/15 (v/v) mixture of ethanol and 10 mM phosphate buffer pH 7.5. Tissue to solvent ratios are denoted as 1:X, indicating 1 mg of tissue was homogenized with X  $\mu$ L solvent.

**Table S-1 List of analyzed metabolites with their abbreviations, names, metabolite classes, HMDB IDs, and MSI level of metabolite identification.**

The table lists metabolites covered by the analyzed MRMs, their abbreviations, names, metabolite classes, MSI level of metabolite identification, and, if available, HMDB IDs. Based on the MSI standards (Salek et al. 2013), the levels were defined as follows: Level 1 are metabolites, which were measured with LC-MS/MS (two orthogonal properties: retention time and MRM) and which had the same isotopically labeled metabolite as internal standard. Level 2 are metabolites, which were either measured with FIA-MS/MS and/or did not have an identical isotopically labeled internal standard. Chirality was not taken into account for classification.

| Abbreviation    | Name                                             | Metabolite class | HMDB ID   | MSI level |
|-----------------|--------------------------------------------------|------------------|-----------|-----------|
| C0              | Carnitine                                        | (Acyl)carnitines |           | Level 2   |
| C0              | D-Carnitine                                      | (Acyl)carnitines | HMDB00062 | Level 2   |
| C0              | L-Carnitine                                      | (Acyl)carnitines |           | Level 2   |
| C2              | Acetylcarnitine                                  | Acylcarnitines   | HMDB00201 | Level 2   |
| C2              | Acetyl-D-carnitine                               | Acylcarnitines   |           | Level 2   |
| C2              | Acetyl-L-carnitine                               | Acylcarnitines   | HMDB00201 | Level 2   |
| C3              | Propionylcarnitine                               | Acylcarnitines   | HMDB00824 | Level 2   |
| C3              | Propionyl-L-carnitine                            | Acylcarnitines   | HMDB00824 | Level 2   |
| C3-DC (C4-OH)   | Malonylcarnitine                                 | Acylcarnitines   | HMDB02095 | Level 2   |
| C3-DC (C4-OH)   | Malonyl-D-carnitine                              | Acylcarnitines   | HMDB02095 | Level 2   |
| C3-DC (C4-OH)   | Malonyl-L-carnitine                              | Acylcarnitines   | HMDB02095 | Level 2   |
| C3-DC (C4-OH)   | Hydroxybutyrylcarnitine                          | Acylcarnitines   | HMDB13127 | Level 2   |
| C3-OH           | Hydroxypropionylcarnitine                        | Acylcarnitines   |           | Level 2   |
| C3:1            | Propenylcarnitine                                | Acylcarnitines   |           | Level 2   |
| C4              | Butyrylcarnitine                                 | Acylcarnitines   | HMDB02013 | Level 2   |
| C4              | Butyryl-L-carnitine                              | Acylcarnitines   | HMDB02013 | Level 2   |
| C4              | Isobutyrylcarnitine                              | Acylcarnitines   | HMDB00736 | Level 2   |
| C4              | Isobutyryl-L-carnitine                           | Acylcarnitines   | HMDB00736 | Level 2   |
| C4:1            | Butenyl-L-carnitine                              | Acylcarnitines   | HMDB13126 | Level 2   |
| C5              | 2-Methylbutyrylcarnitine                         | Acylcarnitines   | HMDB00378 | Level 2   |
| C5              | Isovalerylcarnitine                              | Acylcarnitines   | HMDB00688 | Level 2   |
| C5              | Isovalery-L-carnitine                            | Acylcarnitines   | HMDB00688 | Level 2   |
| C5              | Pivaloylcarnitine                                | Acylcarnitines   |           | Level 2   |
| C5              | Valerylcarnitine                                 | Acylcarnitines   | HMDB13128 | Level 2   |
| C5              | Valeryl-L-carnitine                              | Acylcarnitines   | HMDB13128 | Level 2   |
| C5-DC (C6-OH)   | Glutaryl-L-carnitine (Hydroxyhexanoylcarnitine)  | Acylcarnitines   |           | Level 2   |
| C5-M-DC         | Methylglutaryl-L-carnitine                       | Acylcarnitines   | HMDB00552 | Level 2   |
| C5-OH (C3-DC-M) | Hydroxyvalerylcarnitine (Methylmalonylcarnitine) | Acylcarnitines   |           | Level 2   |
| C5:1            | Tiglylcarnitine                                  | Acylcarnitines   | HMDB02366 | Level 2   |
| C5:1-DC         | Glutaconylcarnitine                              | Acylcarnitines   |           | Level 2   |
| C6 (C4:1-DC)    | Hexanoylcarnitine (Fumaryl-L-carnitine)          | Acylcarnitines   | HMDB00705 | Level 2   |
| C6 (C4:1-DC)    | L-Hexanoylcarnitine                              | Acylcarnitines   | HMDB00756 | Level 2   |



## Metabolomics

| Abbreviation | Name                            | Metabolite class | HMDB ID   | MSI level |
|--------------|---------------------------------|------------------|-----------|-----------|
| C6:1         | Hexenoylcarnitine               | Acylcarnitines   |           | Level 2   |
| C7-DC        | Pimelylcarnitine                | Acylcarnitines   |           | Level 2   |
| C8           | Octanoylcarnitine               | Acylcarnitines   | HMDB00791 | Level 2   |
| C8           | Octanoyl-D-carnitine            | Acylcarnitines   |           | Level 2   |
| C8           | Octanoyl-L-carnitine            | Acylcarnitines   | HMDB00791 | Level 2   |
| C9           | 2,6 Dimethylheptanoylcarnitine  | Acylcarnitines   | HMDB06320 | Level 2   |
| C10          | Decanoylcarnitine               | Acylcarnitines   | HMDB00651 | Level 2   |
| C10          | Decanoyl-L-carnitine            | Acylcarnitines   | HMDB00651 | Level 2   |
| C10:1        | Decenoylcarnitine               | Acylcarnitines   |           | Level 2   |
| C10:2        | Decadienylcarnitine             | Acylcarnitines   |           | Level 2   |
| C12          | Dodecanoylcarnitine             | Acylcarnitines   | HMDB02250 | Level 2   |
| C12          | Dodecanoyl-L-carnitine          | Acylcarnitines   | HMDB02250 | Level 2   |
| C12-DC       | Dodecanedioylcarnitine          | Acylcarnitines   | HMDB13327 | Level 2   |
| C12:1        | Dodecenoylcarnitine             | Acylcarnitines   |           | Level 2   |
| C14          | Myristylcarnitine               | Acylcarnitines   |           | Level 2   |
| C14          | Myristyl-L-carnitine            | Acylcarnitines   |           | Level 2   |
| C14:1        | cis-5-Tetradecenoylcarnitine    | Acylcarnitines   | HMDB02014 | Level 2   |
| C14:1        | Tetradecenoylcarnitine          | Acylcarnitines   |           | Level 2   |
| C14:1-OH     | Hydroxytetradecenoylcarnitine   | Acylcarnitines   |           | Level 2   |
| C14:2        | Tetradecadienylcarnitine        | Acylcarnitines   |           | Level 2   |
| C14:2-OH     | Hydroxytetradecadienylcarnitine | Acylcarnitines   |           | Level 2   |
| C16          | Palmitoylcarnitine              | Acylcarnitines   | HMDB00222 | Level 2   |
| C16          | D-Palmitoylcarnitine            | Acylcarnitines   | HMDB00222 | Level 2   |
| C16          | L-Palmitoylcarnitine            | Acylcarnitines   | HMDB00222 | Level 2   |
| C16-OH       | Hydroxyhexadecanoylcarnitine    | Acylcarnitines   |           | Level 2   |
| C16:1        | trans-Hexadec-2-enoyl carnitine | Acylcarnitines   | HMDB06317 | Level 2   |
| C16:1-OH     | Hydroxyhexadecenoylcarnitine    | Acylcarnitines   |           | Level 2   |
| C16:2        | Hexadecadienylcarnitine         | Acylcarnitines   |           | Level 2   |
| C16:2-OH     | Hydroxyhexadecadienylcarnitine  | Acylcarnitines   |           | Level 2   |
| C18          | Stearoylcarnitine               | Acylcarnitines   | HMDB00848 | Level 2   |
| C18:1        | Oleoylcarnitine                 | Acylcarnitines   | HMDB06464 | Level 2   |
| C18:1        | Elaidic carnitine               | Acylcarnitines   | HMDB06464 | Level 2   |
| C18:1-OH     | Hydroxyoctadecenoylcarnitine    | Acylcarnitines   |           | Level 2   |
| C18:2        | Linoelaidylcarnitine            | Acylcarnitines   | HMDB06461 | Level 2   |
| Ala          | Alanine                         | amino acids      |           | Level 1   |
| Ala          | D-Alanine                       | amino acids      | HMDB01310 | Level 1   |
| Ala          | L-Alanine                       | amino acids      | HMDB00161 | Level 1   |
| Ala          | beta-Alanine                    | amino acids      | HMDB00056 | Level 1   |
| Arg          | Arginine                        | amino acids      |           | Level 1   |
| Arg          | D-Arginine                      | amino acids      | HMDB03416 | Level 1   |
| Arg          | L-Arginine                      | amino acids      | HMDB00517 | Level 1   |
| Asn          | Asparagine                      | amino acids      |           | Level 1   |

*Metabolomics*

| <b>Abbreviation</b> | <b>Name</b>       | <b>Metabolite class</b> | <b>HMDB ID</b> | <b>MSI level</b> |
|---------------------|-------------------|-------------------------|----------------|------------------|
| Asn                 | D-Asparagine      | amino acids             | HMDB33780      | Level 1          |
| Asn                 | L-Asparagine      | amino acids             | HMDB00168      | Level 1          |
| Asp                 | Aspartic acid     | amino acids             |                | Level 1          |
| Asp                 | D-Aspartic acid   | amino acids             | HMDB06483      | Level 1          |
| Asp                 | L-Aspartic acid   | amino acids             | HMDB00191      | Level 1          |
| Cit                 | Citrulline        | amino acids             |                | Level 1          |
| Cit                 | D-Citrulline      | amino acids             |                | Level 1          |
| Cit                 | L-Citrulline      | amino acids             | HMDB00904      | Level 1          |
| Gln                 | Glutamine         | amino acids             |                | Level 1          |
| Gln                 | D-Glutamine       | amino acids             | HMDB03423      | Level 1          |
| Gln                 | L-Glutamine       | amino acids             | HMDB00641      | Level 1          |
| Glu                 | Glutamic acid     | amino acids             |                | Level 1          |
| Glu                 | D-Glutamic acid   | amino acids             | HMDB03339      | Level 1          |
| Glu                 | L-Glutamic acid   | amino acids             | HMDB00148      | Level 1          |
| Gly                 | Glycine           | amino acids             | HMDB00123      | Level 1          |
| His                 | Histidine         | amino acids             |                | Level 1          |
| His                 | D-Histidine       | amino acids             |                | Level 1          |
| His                 | L-Histidine       | amino acids             | HMDB00177      | Level 1          |
| Ile                 | Isoleucine        | amino acids             |                | Level 1          |
| Ile                 | D-Isoleucine      | amino acids             |                | Level 1          |
| Ile                 | L-Isoleucine      | amino acids             | HMDB00172      | Level 1          |
| Ile                 | Allo-D-Isoleucine | amino acids             |                | Level 1          |
| Ile                 | Allo-L-Isoleucine | amino acids             | HMDB00557      | Level 1          |
| Leu                 | Leucine           | amino acids             |                | Level 2          |
| Leu                 | D-Leucine         | amino acids             |                | Level 2          |
| Leu                 | L-Leucine         | amino acids             | HMDB00687      | Level 2          |
| Leu                 | beta-Leucine      | amino acids             |                | Level 2          |
| Leu                 | D-beta-Leucine    | amino acids             | HMDB03640      | Level 2          |
| Leu                 | L-beta-Leucine    | amino acids             | HMDB03640      | Level 2          |
| Lys                 | Lysine            | amino acids             |                | Level 2          |
| Lys                 | D-Lysine          | amino acids             | HMDB03405      | Level 2          |
| Lys                 | L-Lysine          | amino acids             | HMDB00182      | Level 2          |
| Met                 | Methionine        | amino acids             |                | Level 1          |
| Met                 | D-Methionine      | amino acids             |                | Level 1          |
| Met                 | L-Methionine      | amino acids             | HMDB00696      | Level 1          |
| Orn                 | Ornithine         | amino acids             |                | Level 1          |
| Orn                 | D-Ornithine       | amino acids             | HMDB03374      | Level 1          |
| Orn                 | L-Ornithine       | amino acids             | HMDB00214      | Level 1          |
| Phe                 | Phenylalanine     | amino acids             |                | Level 1          |
| Phe                 | D-Phenylalanine   | amino acids             |                | Level 1          |
| Phe                 | L-Phenylalanine   | amino acids             | HMDB00159      | Level 1          |
| Pro                 | Proline           | amino acids             |                | Level 1          |

*Metabolomics*

| <b>Abbreviation</b> | <b>Name</b>                 | <b>Metabolite class</b> | <b>HMDB ID</b> | <b>MSI level</b> |
|---------------------|-----------------------------|-------------------------|----------------|------------------|
| Pro                 | D-Proline                   | amino acids             | HMDB03411      | Level 1          |
| Pro                 | L-Proline                   | amino acids             | HMDB00162      | Level 1          |
| Ser                 | Serine                      | amino acids             |                | Level 1          |
| Ser                 | D-Serine                    | amino acids             | HMDB03406      | Level 1          |
| Ser                 | L-Serine                    | amino acids             | HMDB00187      | Level 1          |
| Thr                 | Threonine                   | amino acids             |                | Level 1          |
| Thr                 | D-Allothreonine             | amino acids             |                | Level 1          |
| Thr                 | L-Allothreonine             | amino acids             | HMDB04041      | Level 1          |
| Thr                 | L-Threonine                 | amino acids             | HMDB00167      | Level 1          |
| Trp                 | Tryptophan                  | amino acids             |                | Level 1          |
| Trp                 | D-Tryptophan                | amino acids             | HMDB13609      | Level 1          |
| Trp                 | L-Tryptophan                | amino acids             | HMDB00929      | Level 1          |
| Tyr                 | Tyrosine                    | amino acids             |                | Level 1          |
| Tyr                 | D-Tyrosine                  | amino acids             |                | Level 1          |
| Tyr                 | L-Tyrosine                  | amino acids             | HMDB00158      | Level 1          |
| Val                 | Valine                      | amino acids             |                | Level 1          |
| Val                 | D-Valine                    | amino acids             |                | Level 1          |
| Val                 | L-Valine                    | amino acids             | HMDB00883      | Level 1          |
| ADMA                | Asymmetric dimethylarginine | biogenic amines         | HMDB01539      | Level 1          |
| Ac-Orn              | Acetylmornithine            | biogenic amines         | HMDB03357      | Level 2          |
| Carnosine           | Carnosine                   | biogenic amines         |                | Level 2          |
| Carnosine           | L-Carnosine                 | biogenic amines         | HMDB00033      | Level 2          |
| Creatinine          | Creatinine                  | biogenic amines         | HMDB00562      | Level 1          |
| DOPA                | Dihydroxyphenylalanine      | biogenic amines         | HMDB00609      | Level 1          |
| DOPA                | Dihydroxyphenyl-D-alanine   | biogenic amines         |                | Level 1          |
| DOPA                | L-Dihydroxyphenylalanine    | biogenic amines         | HMDB00181      | Level 1          |
| Dopamine            | Dopamine                    | biogenic amines         | HMDB00073      | Level 1          |
| Histamine           | Histamine                   | biogenic amines         | HMDB00870      | Level 2          |
| Kynurenine          | Kynurenine                  | biogenic amines         |                | Level 2          |
| Kynurenine          | D-Kynurenine                | biogenic amines         |                | Level 2          |
| Kynurenine          | L-Kynurenine                | biogenic amines         | HMDB00684      | Level 2          |
| Met-SO              | Methionine-Sulfoxide        | biogenic amines         |                | Level 2          |
| Met-SO              | L-Methionine sulfoxide      | biogenic amines         | HMDB02005      | Level 2          |
| Met-SO              | L-Methionine-(R)-Sulfoxide  | biogenic amines         |                | Level 2          |
| Met-SO              | L-Methionine-(S)-Sulfoxide  | biogenic amines         |                | Level 2          |
| Nitro-Tyr           | 2-Nitrotyrosine             | biogenic amines         |                | Level 2          |
| Nitro-Tyr           | 3-Nitrotyrosine             | biogenic amines         | HMDB01904      | Level 2          |
| Nitro-Tyr           | Nitro-D-tyrosine            | biogenic amines         |                | Level 2          |
| Nitro-Tyr           | Nitro-L-tyrosine            | biogenic amines         |                | Level 2          |
| OH-Pro              | 4-Hydroxyproline            | biogenic amines         | HMDB00725      | Level 2          |
| OH-Pro              | 3-Hydroxy-L-proline         | biogenic amines         | HMDB02113      | Level 2          |
| OH-Pro              | 4-Hydroxy-L-proline         | biogenic amines         | HMDB00725      | Level 2          |

## Metabolomics

| Abbreviation   | Name                                        | Metabolite class          | HMDB ID   | MSI level |
|----------------|---------------------------------------------|---------------------------|-----------|-----------|
| OH-Pro         | cis-4-Hydroxy-L-proline                     | biogenic amines           | HMDB06055 | Level 2   |
| PEA            | (1S)-Phenylethylamine                       | biogenic amines           |           | Level 2   |
| PEA            | 1-Phenylethylamine                          | biogenic amines           | HMDB02017 | Level 2   |
| PEA            | 2-Phenylethylamine                          | biogenic amines           | HMDB12275 | Level 2   |
| Putrescine     | Putrescine                                  | biogenic amines           | HMDB01414 | Level 1   |
| SDMA           | Symmetric dimethylarginine                  | biogenic amines           | HMDB03334 | Level 2   |
| SDMA           | L-Symmetric dimethylarginine                | biogenic amines           |           | Level 2   |
| Serotonin      | Serotonin                                   | biogenic amines           | HMDB00259 | Level 1   |
| Spermidine     | Spermidine                                  | biogenic amines           | HMDB01257 | Level 1   |
| Spermine       | Spermine                                    | biogenic amines           | HMDB01256 | Level 1   |
| Taurine        | Taurine                                     | biogenic amines           | HMDB00251 | Level 1   |
| alpha-AAA      | 2-Aminoadipic acid                          | biogenic amines           |           | Level 2   |
| alpha-AAA      | D-2-Aminoadipic acid                        | biogenic amines           |           | Level 2   |
| alpha-AAA      | L-2-Aminoadipic acid                        | biogenic amines           | HMDB00510 | Level 2   |
| lysoPC a C14:0 | C14:0 a Lyso-phosphatidylcholine            | Lyso-phosphatidylcholines |           | Level 2   |
| lysoPC a C14:0 | LysoPC(14:0)                                | Lyso-phosphatidylcholines | HMDB10379 | Level 2   |
| lysoPC a C14:0 | C14:0 2a L-Lyso-phosphatidylcholine         | Lyso-phosphatidylcholines |           | Level 2   |
| lysoPC a C16:0 | C16:0 a Lyso-phosphatidylcholine            | Lyso-phosphatidylcholines |           | Level 2   |
| lysoPC a C16:0 | C16:0 a D-Lyso-phosphatidylcholine          | Lyso-phosphatidylcholines |           | Level 2   |
| lysoPC a C16:0 | LysoPC(16:0)                                | Lyso-phosphatidylcholines | HMDB10382 | Level 2   |
| lysoPC a C16:0 | C16:0 2a Lyso-phosphatidylcholine           | Lyso-phosphatidylcholines |           | Level 2   |
| lysoPC a C16:0 | C16:0 2a L-Lyso-phosphatidylcholine         | Lyso-phosphatidylcholines |           | Level 2   |
| lysoPC a C16:1 | C16:1;9Z-enoyl a Lyso-phosphatidylcholine   | Lyso-phosphatidylcholines |           | Level 2   |
| lysoPC a C16:1 | C16:1;9E-enoyl a L-Lyso-phosphatidylcholine | Lyso-phosphatidylcholines |           | Level 2   |
| lysoPC a C16:1 | LysoPC(16:1(9Z))                            | Lyso-phosphatidylcholines | HMDB10383 | Level 2   |
| lysoPC a C17:0 | C17:0 a Lyso-phosphatidylcholine            | Lyso-phosphatidylcholines |           | Level 2   |
| lysoPC a C17:0 | LysoPC(17:0)                                | Lyso-phosphatidylcholines | HMDB12108 | Level 2   |
| lysoPC a C18:0 | C18:0 a Lyso-phosphatidylcholine            | Lyso-phosphatidylcholines |           | Level 2   |
| lysoPC a C18:0 | C18:0 a D-Lyso-phosphatidylcholine          | Lyso-phosphatidylcholines |           | Level 2   |
| lysoPC a C18:0 | LysoPC(18:0)                                | Lyso-phosphatidylcholines | HMDB10384 | Level 2   |
| lysoPC a C18:0 | C18:0 2a Lyso-phosphatidylcholine           | Lyso-phosphatidylcholines |           | Level 2   |
| lysoPC a C18:0 | C18:0 2a D-Lyso-phosphatidylcholine         | Lyso-phosphatidylcholines |           | Level 2   |
| lysoPC a C18:0 | LysoPC(0:0/18:0)                            | Lyso-phosphatidylcholines | HMDB11128 | Level 2   |
| lysoPC a C18:1 | C18:1;9E-enoyl a Lyso-phosphatidylcholine   | Lyso-phosphatidylcholines |           | Level 2   |

## Metabolomics

| Abbreviation   | Name                                             | Metabolite class          | HMDB ID   | MSI level |
|----------------|--------------------------------------------------|---------------------------|-----------|-----------|
| lysoPC a C18:1 | C18:1;9E-enoyl a L-Lyso-phosphatidylcholine      | Lyso-phosphatidylcholines |           | Level 2   |
| lysoPC a C18:1 | C18:1;9E-enoyl 2a Lyso-phosphatidylcholine       | Lyso-phosphatidylcholines |           | Level 2   |
| lysoPC a C18:1 | C18:1;9E-enoyl 2a L-Lyso-phosphatidylcholine     | Lyso-phosphatidylcholines |           | Level 2   |
| lysoPC a C18:1 | C18:1;6Z-enoyl a L-Lyso-phosphatidylcholine      | Lyso-phosphatidylcholines |           | Level 2   |
| lysoPC a C18:1 | C18:1;6Z-enoyl 2a L-Lyso-phosphatidylcholine     | Lyso-phosphatidylcholines |           | Level 2   |
| lysoPC a C18:1 | C18:1;9Z-enoyl a Lyso-phosphatidylcholine        | Lyso-phosphatidylcholines |           | Level 2   |
| lysoPC a C18:1 | LysoPC(18:1(9Z))                                 | Lyso-phosphatidylcholines | HMDB02815 | Level 2   |
| lysoPC a C18:1 | C18:1;9Z-enoyl 2a Lyso-phosphatidylcholine       | Lyso-phosphatidylcholines |           | Level 2   |
| lysoPC a C18:1 | C18:1;9Z-enoyl 2a L-Lyso-phosphatidylcholine     | Lyso-phosphatidylcholines |           | Level 2   |
| lysoPC a C18:1 | LysoPC(18:1(11Z))                                | Lyso-phosphatidylcholines | HMDB10385 | Level 2   |
| lysoPC a C18:2 | C18:1;9Z,12Z-dienoyl a Lyso-phosphatidylcholine  | Lyso-phosphatidylcholines |           | Level 2   |
| lysoPC a C18:2 | C18:1;2E,4E-dienoyl a L-Lyso-phosphatidylcholine | Lyso-phosphatidylcholines |           | Level 2   |
| lysoPC a C18:2 | LysoPC(18:2(9Z,12Z))                             | Lyso-phosphatidylcholines | HMDB10386 | Level 2   |
| lysoPC a C20:3 | lysoPC a C20:3                                   | Lyso-phosphatidylcholines |           | Level 2   |
| lysoPC a C20:3 | LysoPC(20:3(5Z,8Z,11Z))                          | Lyso-phosphatidylcholines | HMDB10393 | Level 2   |
| lysoPC a C20:3 | LysoPC(20:3(8Z,11Z,14Z))                         | Lyso-phosphatidylcholines | HMDB10394 | Level 2   |
| lysoPC a C20:4 | (5Z,8Z,11Z,14Z) a C20:4 Lyso-phosphatidylcholine | Lyso-phosphatidylcholines |           | Level 2   |
| lysoPC a C20:4 | LysoPC(20:4(5Z,8Z,11Z,14Z))                      | Lyso-phosphatidylcholines | HMDB10395 | Level 2   |
| lysoPC a C20:4 | LysoPC(20:4(8Z,11Z,14Z,17Z))                     | Lyso-phosphatidylcholines | HMDB10396 | Level 2   |
| lysoPC a C24:0 | C24:0 a Lyso-phosphatidylcholine                 | Lyso-phosphatidylcholines |           | Level 2   |
| lysoPC a C24:0 | LysoPC(24:0)                                     | Lyso-phosphatidylcholines | HMDB10405 | Level 2   |
| lysoPC a C26:0 | Lyso-phosphatidylcholine a C26:0                 | Lyso-phosphatidylcholines |           | Level 2   |
| lysoPC a C26:1 | Lyso-phosphatidylcholine a C26:1                 | Lyso-phosphatidylcholines |           | Level 2   |
| lysoPC a C28:0 | Lyso-phosphatidylcholine a C28:0                 | Lyso-phosphatidylcholines |           | Level 2   |
| lysoPC a C28:1 | Lyso-phosphatidylcholine a C28:1                 | Lyso-phosphatidylcholines |           | Level 2   |
| PC aa C26:0    | C(10:0/16:0) aa Phosphatidylcholine              | Phosphatidylcholines      |           | Level 2   |
| PC aa C26:0    | C(11:0/15:0) aa Phosphatidylcholine              | Phosphatidylcholines      |           | Level 2   |
| PC aa C26:0    | C(12:0/14:0) aa L-Phosphatidylcholine            | Phosphatidylcholines      |           | Level 2   |
| PC aa C26:0    | C(13:0/13:0) aa Phosphatidylcholine              | Phosphatidylcholines      |           | Level 2   |
| PC aa C26:0    | C(13:0/13:0) aa L- Phosphatidylcholine           | Phosphatidylcholines      |           | Level 2   |
| PC aa C26:0    | C(14:0/12:0) aa Phosphatidylcholine              | Phosphatidylcholines      |           | Level 2   |
| PC aa C26:0    | C(14:0/12:0) aa L-Phosphatidylcholine            | Phosphatidylcholines      |           | Level 2   |

## Metabolomics

| Abbreviation | Name                                              | Metabolite class     | HMDB ID   | MSI level |
|--------------|---------------------------------------------------|----------------------|-----------|-----------|
| PC aa C26:0  | C(18:0/8:0) aa L-Phosphatidylcholine              | Phosphatidylcholines |           | Level 2   |
| PC aa C26:0  | C(5:0/11:0) aa Phosphatidylcholine                | Phosphatidylcholines |           | Level 2   |
| PC aa C26:0  | C(8:0/18:0) aa Phosphatidylcholine                | Phosphatidylcholines |           | Level 2   |
| PC aa C26:0  | C(9:0/17:0) aa Phosphatidylcholine                | Phosphatidylcholines |           | Level 2   |
| PC aa C26:0  | C(9:0/17:0) aa L-Phosphatidylcholine              | Phosphatidylcholines |           | Level 2   |
| PC aa C28:1  | C(10:0/18:1;9Z-enoyl) aa L-Phosphatidylcholine    | Phosphatidylcholines |           | Level 2   |
| PC aa C30:0  | C(12:0/18:0) aa Phosphatidylcholine               | Phosphatidylcholines |           | Level 2   |
| PC aa C30:0  | C(12:0/18:0) aa L-Phosphatidylcholine             | Phosphatidylcholines |           | Level 2   |
| PC aa C30:0  | C(10:0/20:0) aa L-Phosphatidylcholine             | Phosphatidylcholines |           | Level 2   |
| PC aa C30:0  | C(11:0/19:0) aa L-Phosphatidylcholine             | Phosphatidylcholines |           | Level 2   |
| PC aa C30:0  | C(13:0/17:0) aa L-Phosphatidylcholine             | Phosphatidylcholines |           | Level 2   |
| PC aa C30:0  | C(14:0/16:0) aa Phosphatidylcholine               | Phosphatidylcholines |           | Level 2   |
| PC aa C30:0  | PC(16:0/14:0)                                     | Phosphatidylcholines | HMDB07965 | Level 2   |
| PC aa C30:0  | C(15:0/15:0) aa Phosphatidylcholine               | Phosphatidylcholines |           | Level 2   |
| PC aa C30:0  | PC(15:0/15:0)                                     | Phosphatidylcholines | HMDB07934 | Level 2   |
| PC aa C30:0  | C(16:0/14:0) aa Phosphatidylcholine               | Phosphatidylcholines |           | Level 2   |
| PC aa C30:0  | C(16:0/14:0) aa D-Phosphatidylcholine             | Phosphatidylcholines |           | Level 2   |
| PC aa C30:0  | PC(14:0/16:0)                                     | Phosphatidylcholines | HMDB07869 | Level 2   |
| PC aa C30:0  | C(17:0/13:0) aa L-Phosphatidylcholine             | Phosphatidylcholines |           | Level 2   |
| PC aa C30:0  | C(18:0/12:0) aa Phosphatidylcholine               | Phosphatidylcholines |           | Level 2   |
| PC aa C30:0  | C(18:0/12:0) aa L-Phosphatidylcholine             | Phosphatidylcholines |           | Level 2   |
| PC aa C30:0  | C(19:0/11:0) aa L-Phosphatidylcholine             | Phosphatidylcholines |           | Level 2   |
| PC aa C30:0  | C(20:0/10:0) aa L-Phosphatidylcholine             | Phosphatidylcholines |           | Level 2   |
| PC aa C30:0  | C(21:0/9:0) aa L-Phosphatidylcholine              | Phosphatidylcholines |           | Level 2   |
| PC aa C30:2  | Phosphatidylcholine with diacyl residue sum C30:2 | Phosphatidylcholines |           | Level 2   |
| PC aa C32:0  | C(18:0/14:0) aa Phosphatidylcholine               | Phosphatidylcholines |           | Level 2   |
| PC aa C32:0  | PC(14:0/18:0)                                     | Phosphatidylcholines | HMDB07871 | Level 2   |
| PC aa C32:0  | C(10:0/22:0) aa L-Phosphatidylcholine             | Phosphatidylcholines |           | Level 2   |
| PC aa C32:0  | C(11:0/21:0) aa L-Phosphatidylcholine             | Phosphatidylcholines |           | Level 2   |
| PC aa C32:0  | C(12:0/20:0) aa Phosphatidylcholine               | Phosphatidylcholines |           | Level 2   |
| PC aa C32:0  | C(12:0/20:0) aa L-Phosphatidylcholine             | Phosphatidylcholines |           | Level 2   |
| PC aa C32:0  | C(13:0/19:0) aa L-Phosphatidylcholine             | Phosphatidylcholines |           | Level 2   |
| PC aa C32:0  | C(14:0/18:0) aa Phosphatidylcholine               | Phosphatidylcholines |           | Level 2   |
| PC aa C32:0  | PC(18:0/14:0)                                     | Phosphatidylcholines | HMDB08031 | Level 2   |
| PC aa C32:0  | C(15:0/17:0) aa Phosphatidylcholine               | Phosphatidylcholines |           | Level 2   |
| PC aa C32:0  | C(15:0/17:0) aa L-Phosphatidylcholine             | Phosphatidylcholines |           | Level 2   |
| PC aa C32:0  | C(16:0/16:0) aa Phosphatidylcholine               | Phosphatidylcholines |           | Level 2   |
| PC aa C32:0  | PC(16:0/16:0)                                     | Phosphatidylcholines | HMDB00564 | Level 2   |
| PC aa C32:0  | C(17:0/15:0) aa Phosphatidylcholine               | Phosphatidylcholines |           | Level 2   |
| PC aa C32:0  | C(17:0/15:0) aa L-Phosphatidylcholine             | Phosphatidylcholines |           | Level 2   |
| PC aa C32:0  | C(19:0/13:0) aa Phosphatidylcholine               | Phosphatidylcholines |           | Level 2   |

## Metabolomics

| Abbreviation | Name                                                    | Metabolite class     | HMDB ID   | MSI level |
|--------------|---------------------------------------------------------|----------------------|-----------|-----------|
| PC aa C32:0  | C(19:0/13:0) aa L-Phosphatidylcholine                   | Phosphatidylcholines |           | Level 2   |
| PC aa C32:0  | C(20:0/12:0) aa Phosphatidylcholine                     | Phosphatidylcholines |           | Level 2   |
| PC aa C32:0  | C(20:0/12:0) aa L-Phosphatidylcholine                   | Phosphatidylcholines |           | Level 2   |
| PC aa C32:0  | C(21:0/11:0) aa L-Phosphatidylcholine                   | Phosphatidylcholines |           | Level 2   |
| PC aa C32:0  | C(22:0/10:0) aa Phosphatidylcholine                     | Phosphatidylcholines |           | Level 2   |
| PC aa C32:0  | C(22:0/10:0) aa L-Phosphatidylcholine                   | Phosphatidylcholines |           | Level 2   |
| PC aa C32:0  | C(23:0/9:0) aa L-Phosphatidylcholine                    | Phosphatidylcholines |           | Level 2   |
| PC aa C32:1  | C(18:1;9E-enoyl/14:0) aa Phosphatidylcholine            | Phosphatidylcholines |           | Level 2   |
| PC aa C32:1  | PC(14:0/18:1(11Z))                                      | Phosphatidylcholines | HMDB07872 | Level 2   |
| PC aa C32:1  | C(14:0/18:1;9Z-enoyl) aa Phosphatidylcholine            | Phosphatidylcholines |           | Level 2   |
| PC aa C32:1  | PC(18:1(9Z)/14:0)                                       | Phosphatidylcholines | HMDB08097 | Level 2   |
| PC aa C32:1  | C(16:1;9Z-enoyl/16:0) aa Phosphatidylcholine            | Phosphatidylcholines |           | Level 2   |
| PC aa C32:1  | PC(16:0/16:1(9Z))                                       | Phosphatidylcholines | HMDB07969 | Level 2   |
| PC aa C32:1  | C(18:1;9Z-enoyl/14:0) aa Phosphatidylcholine            | Phosphatidylcholines |           | Level 2   |
| PC aa C32:1  | PC(14:0/18:1(9Z))                                       | Phosphatidylcholines | HMDB07873 | Level 2   |
| PC aa C32:2  | C(16:1;9E-enoyl/16:1;9E-enoyl) aa Phosphatidylcholine   | Phosphatidylcholines |           | Level 2   |
| PC aa C32:2  | C(16:1;9E-enoyl/16:1;9E-enoyl) aa L-Phosphatidylcholine | Phosphatidylcholines |           | Level 2   |
| PC aa C32:2  | C(16:1;9Z-enoyl/16:1;9Z-enoyl) aa Phosphatidylcholine   | Phosphatidylcholines |           | Level 2   |
| PC aa C32:2  | PC(16:1(9Z)/16:1(9Z))                                   | Phosphatidylcholines | HMDB08002 | Level 2   |
| PC aa C32:2  | C(18:2;2E,4E-dienoyl/14:0) aa Phosphatidylcholine       | Phosphatidylcholines |           | Level 2   |
| PC aa C32:2  | C(18:2;11Z,14Z-dienoyl/14:0) aa L-Phosphatidylcholine   | Phosphatidylcholines |           | Level 2   |
| PC aa C32:2  | PC(14:0/18:2(9Z,12Z))                                   | Phosphatidylcholines | HMDB07874 | Level 2   |
| PC aa C32:3  | C(18:3;9Z,12Z,15Z-trienoyl/14:0) aa Phosphatidylcholine | Phosphatidylcholines |           | Level 2   |
| PC aa C32:3  | PC(14:0/18:3(9Z,12Z,15Z))                               | Phosphatidylcholines | HMDB07876 | Level 2   |
| PC aa C34:1  | PC(18:1(9Z)/16:0)                                       | Phosphatidylcholines | HMDB08100 | Level 2   |
| PC aa C34:1  | C(16:0/18:1;9Z-enoyl) aa L-Phosphatidylcholine          | Phosphatidylcholines |           | Level 2   |
| PC aa C34:1  | C(16:0/18:1;9Z-enoyl) aa Phosphatidylcholine            | Phosphatidylcholines |           | Level 2   |
| PC aa C34:1  | PC(18:0/16:1(9Z))                                       | Phosphatidylcholines | HMDB08035 | Level 2   |
| PC aa C34:1  | C(18:0/16:1;7Z-enoyl) aa Phosphatidylcholine            | Phosphatidylcholines |           | Level 2   |
| PC aa C34:1  | PC(16:1(9Z)/18:0)                                       | Phosphatidylcholines | HMDB08003 | Level 2   |
| PC aa C34:1  | C(18:1;11E-enoyl/16:0) aa L-Phosphatidylcholine         | Phosphatidylcholines |           | Level 2   |
| PC aa C34:1  | C(18:1;11Z-enoyl/16:0) aa Phosphatidylcholine           | Phosphatidylcholines |           | Level 2   |
| PC aa C34:1  | PC(16:0/18:1(11Z))                                      | Phosphatidylcholines | HMDB07971 | Level 2   |
| PC aa C34:1  | C(18:1;6Z-enoyl/16:0) aa Phosphatidylcholine            | Phosphatidylcholines |           | Level 2   |
| PC aa C34:1  | C(18:1;6E-enoyl/16:0) aa L-Phosphatidylcholine          | Phosphatidylcholines |           | Level 2   |
| PC aa C34:1  | C(18:1;6Z-enoyl/16:0) aa L-Phosphatidylcholine          | Phosphatidylcholines |           | Level 2   |
| PC aa C34:1  | PC(16:0/18:1(9Z))                                       | Phosphatidylcholines | HMDB07972 | Level 2   |
| PC aa C34:1  | C(18:1;9E-enoyl/16:0) aa D-                             | Phosphatidylcholines |           | Level 2   |

## Metabolomics

| Abbreviation | Name                                                        | Metabolite class     | HMDB ID   | MSI level |
|--------------|-------------------------------------------------------------|----------------------|-----------|-----------|
|              | Phosphatidylcholine                                         |                      |           |           |
| PC aa C34:1  | C(18:1;9E-enoyl/16:0) aa L-Phosphatidylcholine              | Phosphatidylcholines |           | Level 2   |
| PC aa C34:1  | C(18:1;9Z-enoyl/16:0) aa Phosphatidylcholine                | Phosphatidylcholines |           | Level 2   |
| PC aa C34:1  | C(18:1;9Z-enoyl/16:0) aa L-Phosphatidylcholine              | Phosphatidylcholines |           | Level 2   |
| PC aa C34:2  | C(16:0/18:2;2E,4E-dienoyl) aa L-Phosphatidylcholine         | Phosphatidylcholines |           | Level 2   |
| PC aa C34:2  | C(16:0/18:2;6Z,9Z-dienoyl) aa L-Phosphatidylcholine         | Phosphatidylcholines |           | Level 2   |
| PC aa C34:2  | C(16:0/18:2;9Z,12Z-dienoyl) aa Phosphatidylcholine          | Phosphatidylcholines |           | Level 2   |
| PC aa C34:2  | PC(18:2(9Z,12Z)/16:0)                                       | Phosphatidylcholines | HMDB08133 | Level 2   |
| PC aa C34:2  | C(16:1;2E,4E-dienoyl/18:0) aa L-Phosphatidylcholine         | Phosphatidylcholines |           | Level 2   |
| PC aa C34:2  | C(16:1;3E-enoyl/18:1;9Z-enoyl) aa Phosphatidylcholine       | Phosphatidylcholines |           | Level 2   |
| PC aa C34:2  | PC(18:1(9Z)/16:1(9Z))                                       | Phosphatidylcholines | HMDB08101 | Level 2   |
| PC aa C34:2  | C(17:1;10E-enoyl/17:1;10E-enoyl) aa Phosphatidylcholine     | Phosphatidylcholines |           | Level 2   |
| PC aa C34:2  | C(17:1;10E-enoyl/17:1;10Z-enoyl) aa L-Phosphatidylcholine   | Phosphatidylcholines |           | Level 2   |
| PC aa C34:2  | C(17:1;10E-enoyl/17:1;9Z-enoyl) aa L-Phosphatidylcholine    | Phosphatidylcholines |           | Level 2   |
| PC aa C34:2  | PC(16:1(9Z)/18:1(11Z))                                      | Phosphatidylcholines | HMDB08004 | Level 2   |
| PC aa C34:2  | C(18:1;9Z-enoyl/16:1;2Z-enoyl) aa L-Phosphatidylcholine     | Phosphatidylcholines |           | Level 2   |
| PC aa C34:2  | C(18:1;9Z-enoyl/16:1;7Z-enoyl) aa Phosphatidylcholine       | Phosphatidylcholines |           | Level 2   |
| PC aa C34:2  | C(18:1;9Z-enoyl/16:1;9Z-enoyl) aa Phosphatidylcholine       | Phosphatidylcholines |           | Level 2   |
| PC aa C34:2  | PC(16:1(9Z)/18:1(9Z))                                       | Phosphatidylcholines | HMDB08005 | Level 2   |
| PC aa C34:2  | C(18:2;10E,12Z-dienoyl/16:0) aa L-Phosphatidylcholine       | Phosphatidylcholines |           | Level 2   |
| PC aa C34:2  | C(18:2;11Z,13Z-dienoyl/16:0) aa L-Phosphatidylcholine       | Phosphatidylcholines |           | Level 2   |
| PC aa C34:2  | C(18:2;2E,4E-dienoyl/16:0) aa L-Phosphatidylcholine         | Phosphatidylcholines |           | Level 2   |
| PC aa C34:2  | C(18:2;2Z,4Z-dienoyl/16:0) aa L-Phosphatidylcholine         | Phosphatidylcholines |           | Level 2   |
| PC aa C34:2  | C(18:2;6Z,9Z-dienoyl/16:0) aa L-Phosphatidylcholine         | Phosphatidylcholines |           | Level 2   |
| PC aa C34:2  | C(18:2;9E,11E-dienoyl/16:0) aa L-Phosphatidylcholine        | Phosphatidylcholines |           | Level 2   |
| PC aa C34:2  | C(18:2;9E,11Z-dienoyl/16:0) aa L-Phosphatidylcholine        | Phosphatidylcholines |           | Level 2   |
| PC aa C34:2  | PC(16:0/18:2(9Z,12Z))                                       | Phosphatidylcholines | HMDB07973 | Level 2   |
| PC aa C34:2  | C(18:2;9E,12E-dienoyl/16:0) aa L-Phosphatidylcholine        | Phosphatidylcholines |           | Level 2   |
| PC aa C34:2  | C(18:2;9Z,12Z-dienoyl/16:0) aa Phosphatidylcholine          | Phosphatidylcholines |           | Level 2   |
| PC aa C34:2  | C(18:2;9Z,12Z-dienoyl/16:0) aa D-Phosphatidylcholine        | Phosphatidylcholines |           | Level 2   |
| PC aa C34:2  | C(18:2;9Z,12Z-dienoyl/16:0) aa L-Phosphatidylcholine        | Phosphatidylcholines |           | Level 2   |
| PC aa C34:3  | C(18:2;9Z,12Z-dienoyl/16:1;7Z-enoyl) aa Phosphatidylcholine | Phosphatidylcholines |           | Level 2   |



## Metabolomics

| Abbreviation | Name                                                                | Metabolite class     | HMDB ID   | MSI level |
|--------------|---------------------------------------------------------------------|----------------------|-----------|-----------|
| PC aa C34:3  | C(18:2;9Z,12Z-dienoyl/16:1;9Z-enoyl) aa Phosphatidylcholine         | Phosphatidylcholines |           | Level 2   |
| PC aa C34:3  | PC(16:1(9Z)/18:2(9Z,12Z))                                           | Phosphatidylcholines | HMDB08006 | Level 2   |
| PC aa C34:3  | C(18:3;5E,9Z,12Z-trienoyl/16:0) aa Phosphatidylcholine              | Phosphatidylcholines |           | Level 2   |
| PC aa C34:3  | C(18:3;6Z,9Z,12Z-trienoyl/16:0) aa Phosphatidylcholine              | Phosphatidylcholines |           | Level 2   |
| PC aa C34:3  | PC(16:0/18:3(6Z,9Z,12Z))                                            | Phosphatidylcholines | HMDB07974 | Level 2   |
| PC aa C34:3  | C(18:3;9E,12E,15E-trienoyl/16:0) aa Phosphatidylcholine             | Phosphatidylcholines |           | Level 2   |
| PC aa C34:3  | PC(16:0/18:3(9Z,12Z,15Z))                                           | Phosphatidylcholines | HMDB07975 | Level 2   |
| PC aa C34:3  | C(18:3;9Z,12Z,15Z-trienoyl/16:0) aa Phosphatidylcholine             | Phosphatidylcholines |           | Level 2   |
| PC aa C34:3  | C(19:3;9Z,12Z,15Z-trienoyl/15:0) aa Phosphatidylcholine             | Phosphatidylcholines |           | Level 2   |
| PC aa C34:4  | C(16:0/18:4;9Z,11E,13E,15Z-tetraenoyl) aa L-Phosphatidylcholine     | Phosphatidylcholines |           | Level 2   |
| PC aa C34:4  | C(16:2;5Z,8Z-dienoyl/18:2;9Z,12Z-dienoyl) aa Phosphatidylcholine    | Phosphatidylcholines |           | Level 2   |
| PC aa C34:4  | C(17:2;9Z,11Z-dienoyl/17:2;9Z,11Z-dienoyl) aa L-Phosphatidylcholine | Phosphatidylcholines |           | Level 2   |
| PC aa C34:4  | C(18:2;2E,4E-dienoyl/16:2;2E,4E-dienoyl) aa L-Phosphatidylcholine   | Phosphatidylcholines |           | Level 2   |
| PC aa C34:4  | PC(16:0/18:4(6Z,9Z,12Z,15Z))                                        | Phosphatidylcholines | HMDB07976 | Level 2   |
| PC aa C34:4  | C(18:4;9E,11E,13E,15E-tetraenoyl/16:0) aa L-Phosphatidylcholine     | Phosphatidylcholines |           | Level 2   |
| PC aa C34:4  | C(18:4;9E,11E,13E,15E-tetraenoyl/16:0) aa Phosphatidylcholine       | Phosphatidylcholines |           | Level 2   |
| PC aa C34:4  | C(18:4;9Z,11E,13E,15Z-tetraenoyl/16:0) aa L-Phosphatidylcholine     | Phosphatidylcholines |           | Level 2   |
| PC aa C34:4  | C(18:4;9Z,11E,13E,15Z-tetraenoyl/16:0) aa Phosphatidylcholine       | Phosphatidylcholines |           | Level 2   |
| PC aa C34:4  | C(18:4;9Z,11Z,13Z,15Z-tetraenoyl/16:0) aa L-Phosphatidylcholine     | Phosphatidylcholines |           | Level 2   |
| PC aa C34:4  | PC(14:0/20:4(5Z,8Z,11Z,14Z))                                        | Phosphatidylcholines | HMDB07883 | Level 2   |
| PC aa C34:4  | C(20:4;5Z,8Z,11Z,14Z-tetraenoyl/14:0) aa Phosphatidylcholine        | Phosphatidylcholines |           | Level 2   |
| PC aa C36:0  | C(11:0/25:0) aa Phosphatidylcholine                                 | Phosphatidylcholines |           | Level 2   |
| PC aa C36:0  | C(12:0/24:0) aa Phosphatidylcholine                                 | Phosphatidylcholines |           | Level 2   |
| PC aa C36:0  | C(13:0/23:0) aa Phosphatidylcholine                                 | Phosphatidylcholines |           | Level 2   |
| PC aa C36:0  | PC(22:0/14:0)                                                       | Phosphatidylcholines | HMDB08525 | Level 2   |
| PC aa C36:0  | C(15:0/21:0) aa Phosphatidylcholine                                 | Phosphatidylcholines |           | Level 2   |
| PC aa C36:0  | PC(20:0/16:0)                                                       | Phosphatidylcholines | HMDB08265 | Level 2   |
| PC aa C36:0  | C(17:0/19:0) aa Phosphatidylcholine                                 | Phosphatidylcholines |           | Level 2   |
| PC aa C36:0  | PC(18:0/18:0)                                                       | Phosphatidylcholines | HMDB08036 | Level 2   |
| PC aa C36:0  | C(18:0/18:0) aa L-Phosphatidylcholine                               | Phosphatidylcholines |           | Level 2   |
| PC aa C36:0  | C(18:0/18:0) aa Phosphatidylcholine                                 | Phosphatidylcholines |           | Level 2   |
| PC aa C36:0  | C(19:0/17:0) aa Phosphatidylcholine                                 | Phosphatidylcholines |           | Level 2   |
| PC aa C36:0  | PC(16:0/20:0)                                                       | Phosphatidylcholines | HMDB07977 | Level 2   |
| PC aa C36:0  | C(20:0/16:0) aa Phosphatidylcholine                                 | Phosphatidylcholines |           | Level 2   |
| PC aa C36:0  | C(21:0/15:0) aa L-Phosphatidylcholine                               | Phosphatidylcholines |           | Level 2   |
| PC aa C36:0  | PC(14:0/22:0)                                                       | Phosphatidylcholines | HMDB07886 | Level 2   |

## Metabolomics

| Abbreviation | Name                                                      | Metabolite class     | HMDB ID   | MSI level |
|--------------|-----------------------------------------------------------|----------------------|-----------|-----------|
| PC aa C36:0  | C(23:0/13:0) aa L-Phosphatidylcholine                     | Phosphatidylcholines |           | Level 2   |
| PC aa C36:0  | C(24:0/12:0) aa L-Phosphatidylcholine                     | Phosphatidylcholines |           | Level 2   |
| PC aa C36:0  | C(24:0/12:0) aa Phosphatidylcholine                       | Phosphatidylcholines |           | Level 2   |
| PC aa C36:0  | C(25:0/11:0) aa L-Phosphatidylcholine                     | Phosphatidylcholines |           | Level 2   |
| PC aa C36:0  | C(26:0/10:0) aa Phosphatidylcholine                       | Phosphatidylcholines |           | Level 2   |
| PC aa C36:1  | C(16:0/20:1;11Z-enoyl) aa Phosphatidylcholine             | Phosphatidylcholines |           | Level 2   |
| PC aa C36:1  | C(18:0/18:1;9E-enoyl) aa Phosphatidylcholine              | Phosphatidylcholines |           | Level 2   |
| PC aa C36:1  | PC(18:1(9Z)/18:0)                                         | Phosphatidylcholines | HMDB08102 | Level 2   |
| PC aa C36:1  | C(18:0/18:1;9Z-enoyl) aa Phosphatidylcholine              | Phosphatidylcholines |           | Level 2   |
| PC aa C36:1  | PC(18:0/18:1(11Z))                                        | Phosphatidylcholines | HMDB08037 | Level 2   |
| PC aa C36:1  | PC(18:1(11Z)/18:0)                                        | Phosphatidylcholines | HMDB08069 | Level 2   |
| PC aa C36:1  | C(18:1;11Z-enoyl/18:0) aa Phosphatidylcholine             | Phosphatidylcholines |           | Level 2   |
| PC aa C36:1  | C(18:1;12Z-enoyl/18:0) aa L-Phosphatidylcholine           | Phosphatidylcholines |           | Level 2   |
| PC aa C36:1  | C(18:1;12Z-enoyl/18:0) aa Phosphatidylcholine             | Phosphatidylcholines |           | Level 2   |
| PC aa C36:1  | C(18:1;13Z-enoyl/18:0) aa L-Phosphatidylcholine           | Phosphatidylcholines |           | Level 2   |
| PC aa C36:1  | C(18:1;16Z-enoyl/18:0) aa L-Phosphatidylcholine           | Phosphatidylcholines |           | Level 2   |
| PC aa C36:1  | C(18:1;16Z-enoyl/18:0) aa Phosphatidylcholine             | Phosphatidylcholines |           | Level 2   |
| PC aa C36:1  | C(18:1;6Z-enoyl/18:0) aa L-Phosphatidylcholine            | Phosphatidylcholines |           | Level 2   |
| PC aa C36:1  | C(18:1;6Z-enoyl/18:0) aa Phosphatidylcholine              | Phosphatidylcholines |           | Level 2   |
| PC aa C36:1  | C(18:1;7Z-enoyl/18:0) aa L-Phosphatidylcholine            | Phosphatidylcholines |           | Level 2   |
| PC aa C36:1  | C(18:1;9E-enoyl/18:0) aa L-Phosphatidylcholine            | Phosphatidylcholines |           | Level 2   |
| PC aa C36:1  | C(18:1;9E-enoyl/18:0) aa Phosphatidylcholine              | Phosphatidylcholines |           | Level 2   |
| PC aa C36:1  | C(18:1;9Z-enoyl/18:0) aa D-Phosphatidylcholine            | Phosphatidylcholines |           | Level 2   |
| PC aa C36:1  | PC(18:0/18:1(9Z))                                         | Phosphatidylcholines | HMDB08038 | Level 2   |
| PC aa C36:1  | C(18:1;9Z-enoyl/18:0) aa Phosphatidylcholine              | Phosphatidylcholines |           | Level 2   |
| PC aa C36:1  | C(20:1;11Z-enoyl/16:0) aa Phosphatidylcholine             | Phosphatidylcholines |           | Level 2   |
| PC aa C36:2  | PC(18:2(9Z,12Z)/18:0)                                     | Phosphatidylcholines | HMDB08135 | Level 2   |
| PC aa C36:2  | C(18:0/18:2;9Z,12Z-dienoyl) aa Phosphatidylcholine        | Phosphatidylcholines |           | Level 2   |
| PC aa C36:2  | C(18:1;10E-enoyl/18:1;10E-enoyl) aa Phosphatidylcholine   | Phosphatidylcholines |           | Level 2   |
| PC aa C36:2  | C(18:1;10Z-enoyl/18:1;10Z-enoyl) aa L-Phosphatidylcholine | Phosphatidylcholines |           | Level 2   |
| PC aa C36:2  | C(18:1;11E-enoyl/18:1;11E-enoyl) aa L-Phosphatidylcholine | Phosphatidylcholines |           | Level 2   |
| PC aa C36:2  | C(18:1;11E-enoyl/18:1;11E-enoyl) aa Phosphatidylcholine   | Phosphatidylcholines |           | Level 2   |
| PC aa C36:2  | PC(18:1(11Z)/18:1(11Z))                                   | Phosphatidylcholines | HMDB08070 | Level 2   |
| PC aa C36:2  | C(18:1;11Z-enoyl/18:1;11Z-enoyl) aa Phosphatidylcholine   | Phosphatidylcholines |           | Level 2   |
| PC aa C36:2  | C(18:1;12E-enoyl/18:1;12E-enoyl) aa Phosphatidylcholine   | Phosphatidylcholines |           | Level 2   |
| PC aa C36:2  | C(18:1;12Z-enoyl/18:1;12Z-enoyl) aa L-Phosphatidylcholine | Phosphatidylcholines |           | Level 2   |

## Metabolomics

| Abbreviation | Name                                                      | Metabolite class     | HMDB ID   | MSI level |
|--------------|-----------------------------------------------------------|----------------------|-----------|-----------|
| PC aa C36:2  | C(18:1;13E-enoyl/18:1;13E-enoyl) aa Phosphatidylcholine   | Phosphatidylcholines |           | Level 2   |
| PC aa C36:2  | C(18:1;13Z-enoyl/18:1;13E-enoyl) aa L-Phosphatidylcholine | Phosphatidylcholines |           | Level 2   |
| PC aa C36:2  | C(18:1;14E-enoyl/18:1;14E-enoyl) aa Phosphatidylcholine   | Phosphatidylcholines |           | Level 2   |
| PC aa C36:2  | C(18:1;14Z-enoyl/18:1;14Z-enoyl) aa L-Phosphatidylcholine | Phosphatidylcholines |           | Level 2   |
| PC aa C36:2  | C(18:1;15E-enoyl/18:1;15E-enoyl) aa Phosphatidylcholine   | Phosphatidylcholines |           | Level 2   |
| PC aa C36:2  | C(18:1;15Z-enoyl/18:1;15Z-enoyl) aa L-Phosphatidylcholine | Phosphatidylcholines |           | Level 2   |
| PC aa C36:2  | C(18:1;16E-enoyl/18:1;16E-enoyl) aa Phosphatidylcholine   | Phosphatidylcholines |           | Level 2   |
| PC aa C36:2  | C(18:1;16Z-enoyl/18:1;16Z-enoyl) aa L-Phosphatidylcholine | Phosphatidylcholines |           | Level 2   |
| PC aa C36:2  | C(18:1;17-enoyl/18:1;17-enoyl) aa L-Phosphatidylcholine   | Phosphatidylcholines |           | Level 2   |
| PC aa C36:2  | C(18:1;2E-enoyl/18:1;2E-enoyl) aa Phosphatidylcholine     | Phosphatidylcholines |           | Level 2   |
| PC aa C36:2  | C(18:1;2Z-enoyl/18:1;2Z-enoyl) aa L-Phosphatidylcholine   | Phosphatidylcholines |           | Level 2   |
| PC aa C36:2  | C(18:1;3E-enoyl/18:1;3E-enoyl) aa Phosphatidylcholine     | Phosphatidylcholines |           | Level 2   |
| PC aa C36:2  | C(18:1;3Z-enoyl/18:1;3Z-enoyl) aa L-Phosphatidylcholine   | Phosphatidylcholines |           | Level 2   |
| PC aa C36:2  | C(18:1;4E-enoyl/18:1;4E-enoyl) aa Phosphatidylcholine     | Phosphatidylcholines |           | Level 2   |
| PC aa C36:2  | C(18:1;4Z-enoyl/18:1;4Z-enoyl) aa Phosphatidylcholine     | Phosphatidylcholines |           | Level 2   |
| PC aa C36:2  | C(18:1;5E-enoyl/18:1;5E-enoyl) aa Phosphatidylcholine     | Phosphatidylcholines |           | Level 2   |
| PC aa C36:2  | C(18:1;5Z-enoyl/18:1;5Z-enoyl) aa L-Phosphatidylcholine   | Phosphatidylcholines |           | Level 2   |
| PC aa C36:2  | C(18:1;6E-enoyl/18:1;6E-enoyl) aa L-Phosphatidylcholine   | Phosphatidylcholines |           | Level 2   |
| PC aa C36:2  | C(18:1;6E-enoyl/18:1;6E-enoyl) aa Phosphatidylcholine     | Phosphatidylcholines |           | Level 2   |
| PC aa C36:2  | C(18:1;6Z-enoyl/18:1;6Z-enoyl) aa L-Phosphatidylcholine   | Phosphatidylcholines |           | Level 2   |
| PC aa C36:2  | C(18:1;6Z-enoyl/18:1;6Z-enoyl) aa Phosphatidylcholine     | Phosphatidylcholines |           | Level 2   |
| PC aa C36:2  | C(18:1;7E-enoyl/18:1;7E-enoyl) aa Phosphatidylcholine     | Phosphatidylcholines |           | Level 2   |
| PC aa C36:2  | C(18:1;7Z-enoyl/18:1;7Z-enoyl) aa L-Phosphatidylcholine   | Phosphatidylcholines |           | Level 2   |
| PC aa C36:2  | C(18:1;8E-enoyl/18:1;8E-enoyl) aa Phosphatidylcholine     | Phosphatidylcholines |           | Level 2   |
| PC aa C36:2  | C(18:1;8Z-enoyl/18:1;8Z-enoyl) aa L-Phosphatidylcholine   | Phosphatidylcholines |           | Level 2   |
| PC aa C36:2  | C(18:1;9E-enoyl/18:1;9E-enoyl) aa L-Phosphatidylcholine   | Phosphatidylcholines |           | Level 2   |
| PC aa C36:2  | C(18:1;9E-enoyl/18:1;9E-enoyl) aa Phosphatidylcholine     | Phosphatidylcholines |           | Level 2   |
| PC aa C36:2  | C(18:1;9Z-enoyl/18:1;9Z-enoyl) aa D-Phosphatidylcholine   | Phosphatidylcholines |           | Level 2   |
| PC aa C36:2  | PC(18:1(9Z)/18:1(9Z))                                     | Phosphatidylcholines | HMDB00593 | Level 2   |
| PC aa C36:2  | C(18:2;10Z,12Z-dienoyl/18:0) aa L-Phosphatidylcholine     | Phosphatidylcholines |           | Level 2   |
| PC aa C36:2  | C(18:2;2E,4E-dienoyl/18:0) aa L-                          | Phosphatidylcholines |           | Level 2   |

## Metabolomics

| Abbreviation | Name                                                              | Metabolite class     | HMDB ID   | MSI level |
|--------------|-------------------------------------------------------------------|----------------------|-----------|-----------|
|              | Phosphatidylcholine                                               |                      |           |           |
| PC aa C36:2  | C(18:2;6Z,9Z-dienoyl/18:0) aa L-Phosphatidylcholine               | Phosphatidylcholines |           | Level 2   |
| PC aa C36:2  | C(18:2;6Z,9Z-dienoyl/18:0) aa Phosphatidylcholine                 | Phosphatidylcholines |           | Level 2   |
| PC aa C36:2  | PC(18:0/18:2(9Z,12Z))                                             | Phosphatidylcholines | HMDB08039 | Level 2   |
| PC aa C36:2  | C(18:2;9Z,12Z-dienoyl/18:0) aa Phosphatidylcholine                | Phosphatidylcholines |           | Level 2   |
| PC aa C36:2  | C(20:2;11E,14E-enoyl/16:0) aa Phosphatidylcholine                 | Phosphatidylcholines |           | Level 2   |
| PC aa C36:3  | PC(18:0/18:3(6Z,9Z,12Z))                                          | Phosphatidylcholines | HMDB08040 | Level 2   |
| PC aa C36:3  | C(18:3;9Z,12Z,15Z-trienoyl/18:0) aa Phosphatidylcholine           | Phosphatidylcholines |           | Level 2   |
| PC aa C36:3  | C(20:3;11E,14E,17E-trienoyl/16:0) aa Phosphatidylcholine          | Phosphatidylcholines |           | Level 2   |
| PC aa C36:3  | C(20:3;5E,8E,11E-trienoyl/16:0) aa Phosphatidylcholine            | Phosphatidylcholines |           | Level 2   |
| PC aa C36:3  | PC(16:0/20:3(5Z,8Z,11Z))                                          | Phosphatidylcholines | HMDB07980 | Level 2   |
| PC aa C36:3  | C(20:3;5Z,8Z,11Z-trienoyl/16:0) aa Phosphatidylcholine            | Phosphatidylcholines |           | Level 2   |
| PC aa C36:3  | C(20:3;8E,11E,14E-trienoyl/16:0) aa D-Phosphatidylcholine         | Phosphatidylcholines |           | Level 2   |
| PC aa C36:3  | C(20:3;8E,11E,14E-trienoyl/16:0) aa L-Phosphatidylcholine         | Phosphatidylcholines |           | Level 2   |
| PC aa C36:3  | C(20:3;8E,11E,14E-trienoyl/16:0) aa Phosphatidylcholine           | Phosphatidylcholines |           | Level 2   |
| PC aa C36:3  | PC(16:0/20:3(8Z,11Z,14Z))                                         | Phosphatidylcholines | HMDB07981 | Level 2   |
| PC aa C36:3  | C(20:3;8Z,11Z,14Z-trienoyl/16:0) aa Phosphatidylcholine           | Phosphatidylcholines |           | Level 2   |
| PC aa C36:3  | C18:2;6Z,9Z-dienoyl/18:1;9Z-enoyl) aa L-Phosphatidylcholine       | Phosphatidylcholines |           | Level 2   |
| PC aa C36:3  | C18:2;6Z,9Z-dienoyl/18:1;9Z-enoyl) aa Phosphatidylcholine         | Phosphatidylcholines |           | Level 2   |
| PC aa C36:3  | PC(18:1(9Z)/18:2(9Z,12Z))                                         | Phosphatidylcholines | HMDB08105 | Level 2   |
| PC aa C36:3  | C18:2;9Z,12Z-dienoyl/18:1;9Z-enoyl) aa Phosphatidylcholine        | Phosphatidylcholines |           | Level 2   |
| PC aa C36:4  | C(16:0/20:4;Z,8E,11E,14E,17E-tetraenoyl) aa L-Phosphatidylcholine | Phosphatidylcholines |           | Level 2   |
| PC aa C36:4  | PC(20:4(5Z,8Z,11Z,14Z)/16:0)                                      | Phosphatidylcholines | HMDB08429 | Level 2   |
| PC aa C36:4  | C(16:0/20:4;Z,8Z,11Z,14Z-tetraenoyl) aa Phosphatidylcholine       | Phosphatidylcholines |           | Level 2   |
| PC aa C36:4  | PC(18:3(6Z,9Z,12Z)/18:1(9Z))                                      | Phosphatidylcholines | HMDB08170 | Level 2   |
| PC aa C36:4  | PC(18:3(9Z,12Z,15Z)/18:1(9Z))                                     | Phosphatidylcholines | HMDB08203 | Level 2   |
| PC aa C36:4  | C(18:2;15E,17-dienoyl/18:2;15E,17-dienoyl) aa Phosphatidylcholine | Phosphatidylcholines |           | Level 2   |
| PC aa C36:4  | C(18:2;2E,4E-dienoyl/18:2;2E,17-dienoyl) aa D-Phosphatidylcholine | Phosphatidylcholines |           | Level 2   |
| PC aa C36:4  | C(18:2;2E,4E-dienoyl/18:2;2E,4E-dienoyl) aa D-Phosphatidylcholine | Phosphatidylcholines |           | Level 2   |
| PC aa C36:4  | C(18:2;2E,4E-dienoyl/18:2;2E,4E-dienoyl) aa L-Phosphatidylcholine | Phosphatidylcholines |           | Level 2   |
| PC aa C36:4  | C(18:2;2E,4E-dienoyl/18:2;2E,4E-dienoyl) aa Phosphatidylcholine   | Phosphatidylcholines |           | Level 2   |
| PC aa C36:4  | C(18:2;2Z,4Z-dienoyl/18:2;2Z,4Z-dienoyl) aa L-Phosphatidylcholine | Phosphatidylcholines |           | Level 2   |
| PC aa C36:4  | C(18:2;5Z,8Z-dienoyl/18:2;5Z,9Z-dienoyl) aa Phosphatidylcholine   | Phosphatidylcholines |           | Level 2   |

## Metabolomics

| Abbreviation | Name                                                                           | Metabolite class     | HMDB ID   | MSI level |
|--------------|--------------------------------------------------------------------------------|----------------------|-----------|-----------|
| PC aa C36:4  | C(18:2;6Z,9Z-dienoyl/18:2;6Z,9Z-dienoyl) aa L-Phosphatidylcholine              | Phosphatidylcholines |           | Level 2   |
| PC aa C36:4  | C(18:2;6Z,9Z-dienoyl/18:2;6Z,9Z-dienoyl) aa Phosphatidylcholine                | Phosphatidylcholines |           | Level 2   |
| PC aa C36:4  | C(18:2;9E,12Z-dienoyl/18:2;9E,12Z-dienoyl) aa Phosphatidylcholine              | Phosphatidylcholines |           | Level 2   |
| PC aa C36:4  | C(18:2;9Z,11Z-dienoyl/18:2;9Z,11Z-dienoyl) aa L-Phosphatidylcholine            | Phosphatidylcholines |           | Level 2   |
| PC aa C36:4  | C(18:2;9Z,12Z-dienoyl/18:2;9Z,12Z-dienoyl) aa D-Phosphatidylcholine            | Phosphatidylcholines |           | Level 2   |
| PC aa C36:4  | PC(18:2(9Z,12Z)/18:2(9Z,12Z))                                                  | Phosphatidylcholines | HMDB08138 | Level 2   |
| PC aa C36:4  | C(18:2;9Z,12Z-dienoyl/18:2;9Z,12Z-dienoyl) aa Phosphatidylcholine              | Phosphatidylcholines |           | Level 2   |
| PC aa C36:4  | PC(18:1(9Z)/18:3(6Z,9Z,12Z))                                                   | Phosphatidylcholines | HMDB08106 | Level 2   |
| PC aa C36:4  | PC(18:1(9Z)/18:3(9Z,12Z,15Z))                                                  | Phosphatidylcholines | HMDB08107 | Level 2   |
| PC aa C36:4  | C(18:3;9Z,12Z,15Z-trienoyl/18:1;9Z-enoyl) aa Phosphatidylcholine               | Phosphatidylcholines |           | Level 2   |
| PC aa C36:4  | C(18:4;5Z,8Z,11Z,14Z-tetraenoyl/18:0) aa Phosphatidylcholine                   | Phosphatidylcholines |           | Level 2   |
| PC aa C36:4  | PC(18:0/18:4(6Z,9Z,12Z,15Z))                                                   | Phosphatidylcholines | HMDB08042 | Level 2   |
| PC aa C36:4  | C(18:4;9E,11E,13E,15E-tetraenoyl/18:0) aa L-Phosphatidylcholine                | Phosphatidylcholines |           | Level 2   |
| PC aa C36:4  | C(18:4;9E,11E,13E,15E-tetraenoyl/18:0) aa Phosphatidylcholine                  | Phosphatidylcholines |           | Level 2   |
| PC aa C36:4  | C(18:4;9E,11E,13Z,15Z-tetraenoyl/18:0) aa Phosphatidylcholine                  | Phosphatidylcholines |           | Level 2   |
| PC aa C36:4  | PC(16:0/20:4(5Z,8Z,11Z,14Z))                                                   | Phosphatidylcholines | HMDB07982 | Level 2   |
| PC aa C36:4  | C(20:4;5E,8E,11E,14E-tetraenoyl/16:0) aa Phosphatidylcholine                   | Phosphatidylcholines |           | Level 2   |
| PC aa C36:4  | C(20:4;5Z,8Z,11Z,14Z-tetraenoyl/16:0) aa L-Phosphatidylcholine                 | Phosphatidylcholines |           | Level 2   |
| PC aa C36:4  | C(20:4;5Z,8Z,11Z,14Z-tetraenoyl/16:0) aa Phosphatidylcholine                   | Phosphatidylcholines |           | Level 2   |
| PC aa C36:5  | C(18:1;11Z-enoyl/18:4;2E,4E,6E,11Z-tetraenoyl) aa Phosphatidylcholine          | Phosphatidylcholines |           | Level 2   |
| PC aa C36:5  | C(20:4;5Z,8Z,11Z,14Z-tetraenoyl/16:1;7Z-enoyl) aa L-Phosphatidylcholine        | Phosphatidylcholines |           | Level 2   |
| PC aa C36:5  | PC(16:1(9Z)/20:4(5Z,8Z,11Z,14Z))                                               | Phosphatidylcholines | HMDB08015 | Level 2   |
| PC aa C36:5  | C(20:4;5Z,8Z,11Z,14Z-tetraenoyl/16:1;9Z-enoyl) aa Phosphatidylcholine          | Phosphatidylcholines |           | Level 2   |
| PC aa C36:5  | C(20:5;5E,8E,11E,14E,17E-pentaenoyl/16:0) aa Phosphatidylcholine               | Phosphatidylcholines |           | Level 2   |
| PC aa C36:5  | PC(16:0/20:5(5Z,8Z,11Z,14Z,17Z))                                               | Phosphatidylcholines | HMDB07984 | Level 2   |
| PC aa C36:5  | C(20:5;5Z,8Z,11Z,14Z,17Z-pentaenoyl/16:0) aa Phosphatidylcholine               | Phosphatidylcholines |           | Level 2   |
| PC aa C36:6  | C(18:2;9Z,12Z-dienoyl/18:4;9E,11E,13E,15E-tetraenoyl) aa L-Phosphatidylcholine | Phosphatidylcholines |           | Level 2   |
| PC aa C36:6  | C(18:3;6Z,9Z,12Z-trienoyl/18:3;6Z,9Z,12Z-trienoyl) aa Phosphatidylcholine      | Phosphatidylcholines |           | Level 2   |
| PC aa C36:6  | C(18:3;8E,10E,12E-trienoyl/18:3;8E,10E,12E-trienoyl) aa Phosphatidylcholine    | Phosphatidylcholines |           | Level 2   |
| PC aa C36:6  | C(18:3;9E,11E,13E-trienoyl/18:3;9E,11E,13E-trienoyl) aa L-Phosphatidylcholine  | Phosphatidylcholines |           | Level 2   |
| PC aa C36:6  | C(18:3;9E,11E,13E-trienoyl/18:3;9E,11E,13E-trienoyl) aa Phosphatidylcholine    | Phosphatidylcholines |           | Level 2   |
| PC aa C36:6  | C(18:3;9Z,11E,13E-trienoyl/18:3;9Z,11E,13E-trienoyl) aa L-Phosphatidylcholine  | Phosphatidylcholines |           | Level 2   |

## Metabolomics

| Abbreviation | Name                                                                        | Metabolite class     | HMDB ID   | MSI level |
|--------------|-----------------------------------------------------------------------------|----------------------|-----------|-----------|
| PC aa C36:6  | PC(18:3(9Z,12Z,15Z)/18:3(9Z,12Z,15Z))                                       | Phosphatidylcholines | HMDB08206 | Level 2   |
| PC aa C36:6  | C(18:3;9Z,12Z,15Z-trienoyl/18:3;9Z,12Z,15Z-trienoyl) aa Phosphatidylcholine | Phosphatidylcholines |           | Level 2   |
| PC aa C36:6  | PC(14:0/22:6(4Z,7Z,10Z,13Z,16Z,19Z))                                        | Phosphatidylcholines | HMDB07892 | Level 2   |
| PC aa C36:6  | C(22:6;4Z,7Z,10Z,13Z,16Z,19Z-hexaenoyl/14:0) aa Phosphatidylcholine         | Phosphatidylcholines |           | Level 2   |
| PC aa C38:0  | C(12:0/26:0) aa Phosphatidylcholine                                         | Phosphatidylcholines |           | Level 2   |
| PC aa C38:0  | C(13:0/25:0) aa Phosphatidylcholine                                         | Phosphatidylcholines |           | Level 2   |
| PC aa C38:0  | PC(24:0/14:0)                                                               | Phosphatidylcholines | HMDB08755 | Level 2   |
| PC aa C38:0  | C(15:0/23:0) aa Phosphatidylcholine                                         | Phosphatidylcholines |           | Level 2   |
| PC aa C38:0  | C(16:0/22:0) aa L-Phosphatidylcholine                                       | Phosphatidylcholines |           | Level 2   |
| PC aa C38:0  | PC(22:0/16:0)                                                               | Phosphatidylcholines | HMDB08528 | Level 2   |
| PC aa C38:0  | PC(20:0/18:0)                                                               | Phosphatidylcholines | HMDB08267 | Level 2   |
| PC aa C38:0  | C(19:0/19:0) aa L-Phosphatidylcholine                                       | Phosphatidylcholines |           | Level 2   |
| PC aa C38:0  | C(19:0/19:0) aa Phosphatidylcholine                                         | Phosphatidylcholines |           | Level 2   |
| PC aa C38:0  | PC(18:0/20:0)                                                               | Phosphatidylcholines | HMDB08043 | Level 2   |
| PC aa C38:0  | C(20:0/18:0) aa Phosphatidylcholine                                         | Phosphatidylcholines |           | Level 2   |
| PC aa C38:0  | C(21:0/17:0) aa Phosphatidylcholine                                         | Phosphatidylcholines |           | Level 2   |
| PC aa C38:0  | C(17:0/21:0) aa Phosphatidylcholine                                         | Phosphatidylcholines |           | Level 2   |
| PC aa C38:0  | PC(16:0/22:0)                                                               | Phosphatidylcholines | HMDB07985 | Level 2   |
| PC aa C38:0  | C(22:0/16:0) aa Phosphatidylcholine                                         | Phosphatidylcholines |           | Level 2   |
| PC aa C38:0  | C(23:0/15:0) aa Phosphatidylcholine                                         | Phosphatidylcholines |           | Level 2   |
| PC aa C38:0  | PC(14:0/24:0)                                                               | Phosphatidylcholines | HMDB07893 | Level 2   |
| PC aa C38:0  | C(25:0/13:0) aa L-Phosphatidylcholine                                       | Phosphatidylcholines |           | Level 2   |
| PC aa C38:1  | C(18:1;11E-enoyl/20:0) aa Phosphatidylcholine                               | Phosphatidylcholines |           | Level 2   |
| PC aa C38:1  | PC(20:0/18:1(11Z))                                                          | Phosphatidylcholines | HMDB08268 | Level 2   |
| PC aa C38:1  | C(18:1;13E-enoyl/20:0) aa Phosphatidylcholine                               | Phosphatidylcholines |           | Level 2   |
| PC aa C38:1  | C(18:1;6Z-enoyl/20:0) aa L-Phosphatidylcholine                              | Phosphatidylcholines |           | Level 2   |
| PC aa C38:1  | C(18:1;7Z-enoyl/20:0) aa L-Phosphatidylcholine                              | Phosphatidylcholines |           | Level 2   |
| PC aa C38:1  | PC(20:0/18:1(9Z))                                                           | Phosphatidylcholines | HMDB08269 | Level 2   |
| PC aa C38:1  | C(18:1;9Z-enoyl/20:0) aa Phosphatidylcholine                                | Phosphatidylcholines |           | Level 2   |
| PC aa C38:1  | C(20:0/18:1;9E-enoyl) aa L-Phosphatidylcholine                              | Phosphatidylcholines |           | Level 2   |
| PC aa C38:1  | C(20:0/18:1;9E-enoyl) aa Phosphatidylcholine                                | Phosphatidylcholines |           | Level 2   |
| PC aa C38:1  | PC(18:1(9Z)/20:0)                                                           | Phosphatidylcholines | HMDB08109 | Level 2   |
| PC aa C38:1  | C(20:0/18:1;9Z-enoyl) aa Phosphatidylcholine                                | Phosphatidylcholines |           | Level 2   |
| PC aa C38:1  | PC(18:0/20:1(11Z))                                                          | Phosphatidylcholines | HMDB08044 | Level 2   |
| PC aa C38:1  | C(20:1;13Z-enoyl/18:0) aa L-Phosphatidylcholine                             | Phosphatidylcholines |           | Level 2   |
| PC aa C38:1  | C(20:1;14Z-enoyl/18:0) aa L-Phosphatidylcholine                             | Phosphatidylcholines |           | Level 2   |
| PC aa C38:1  | C(20:1;5Z-enoyl/18:0) aa L-Phosphatidylcholine                              | Phosphatidylcholines |           | Level 2   |
| PC aa C38:1  | C(20:1;8Z-enoyl/18:0) aa L-Phosphatidylcholine                              | Phosphatidylcholines |           | Level 2   |

## Metabolomics

| Abbreviation | Name                                                                  | Metabolite class     | HMDB ID   | MSI level |
|--------------|-----------------------------------------------------------------------|----------------------|-----------|-----------|
| PC aa C38:1  | PC(16:0/22:1(13Z))                                                    | Phosphatidylcholines | HMDB07986 | Level 2   |
| PC aa C38:1  | C(22:1;13Z-enoyl/16:0) aa Phosphatidylcholine                         | Phosphatidylcholines |           | Level 2   |
| PC aa C38:1  | PC(14:0/24:1(15Z))                                                    | Phosphatidylcholines | HMDB07894 | Level 2   |
| PC aa C38:3  | C(20:1;13Z-enoyl/18:2;9Z,12Z-dienoyl) aa L-Phosphatidylcholine        | Phosphatidylcholines |           | Level 2   |
| PC aa C38:3  | C(20:3;5E,8E,11E-trienoyl/18:0) aa Phosphatidylcholine                | Phosphatidylcholines |           | Level 2   |
| PC aa C38:3  | C(20:3;5Z,11Z,14Z-trienoyl/18:0) aa L-Phosphatidylcholine             | Phosphatidylcholines |           | Level 2   |
| PC aa C38:3  | PC(18:0/20:3(5Z,8Z,11Z))                                              | Phosphatidylcholines | HMDB08046 | Level 2   |
| PC aa C38:3  | C(20:3;5Z,8Z,11Z-trienoyl/18:0) aa Phosphatidylcholine                | Phosphatidylcholines |           | Level 2   |
| PC aa C38:3  | C(20:3;5Z,8Z,14Z-trienoyl/18:0) aa L-Phosphatidylcholine              | Phosphatidylcholines |           | Level 2   |
| PC aa C38:3  | PC(18:0/20:3(8Z,11Z,14Z))                                             | Phosphatidylcholines | HMDB08047 | Level 2   |
| PC aa C38:3  | C(20:3;8Z,11Z,14Z-trienoyl/18:0) aa Phosphatidylcholine               | Phosphatidylcholines |           | Level 2   |
| PC aa C38:3  | C(22:3;13Z,16Z,19Z-trienoyl/16:0) aa Phosphatidylcholine              | Phosphatidylcholines |           | Level 2   |
| PC aa C38:4  | PC(18:1(9Z)/20:3(5Z,8Z,11Z))                                          | Phosphatidylcholines | HMDB08112 | Level 2   |
| PC aa C38:4  | C(20:4;5E,8E,11E,14E-tetraenoyl/18:0) aa Phosphatidylcholine          | Phosphatidylcholines |           | Level 2   |
| PC aa C38:4  | PC(18:0/20:4(5Z,8Z,11Z,14Z))                                          | Phosphatidylcholines | HMDB08048 | Level 2   |
| PC aa C38:4  | C(20:4;5Z,8Z,11Z,14Z-tetraenoyl/18:0) aa Phosphatidylcholine          | Phosphatidylcholines |           | Level 2   |
| PC aa C38:4  | C(20:4;8Z,10Z,12Z,14Z-tetraenoyl/18:0) aa L-Phosphatidylcholine       | Phosphatidylcholines |           | Level 2   |
| PC aa C38:4  | PC(16:0/22:4(7Z,10Z,13Z,16Z))                                         | Phosphatidylcholines | HMDB07988 | Level 2   |
| PC aa C38:4  | C(22:4;7Z,10Z,13Z,16Z-tetraenoyl/16:0) aa Phosphatidylcholine         | Phosphatidylcholines |           | Level 2   |
| PC aa C38:5  | PC(18:1(9Z)/20:4(5Z,8Z,11Z,14Z))                                      | Phosphatidylcholines | HMDB08114 | Level 2   |
| PC aa C38:5  | C(20:4;5Z,8Z,11Z,14Z-tetraenoyl/18:1;9Z-enoyl) aa Phosphatidylcholine | Phosphatidylcholines |           | Level 2   |
| PC aa C38:5  | PC(18:0/20:5(5Z,8Z,11Z,14Z,17Z))                                      | Phosphatidylcholines | HMDB08050 | Level 2   |
| PC aa C38:5  | C(20:5;5Z,8Z,11Z,14Z,17Z-pentaenoyl/18:0) aa Phosphatidylcholine      | Phosphatidylcholines |           | Level 2   |
| PC aa C38:5  | C(20:5;9Z,11Z,13Z,15Z,17Z-pentaenoyl/18:0) aa L-Phosphatidylcholine   | Phosphatidylcholines |           | Level 2   |
| PC aa C38:5  | C(22:5;4E,7E,10E,13E,16E-pentaenoyl/16:0) aa Phosphatidylcholine      | Phosphatidylcholines |           | Level 2   |
| PC aa C38:5  | PC(16:0/22:5(4Z,7Z,10Z,13Z,16Z))                                      | Phosphatidylcholines | HMDB07989 | Level 2   |
| PC aa C38:5  | C(22:5;4Z,7Z,10Z,13Z,16Z-pentaenoyl/16:0) aa Phosphatidylcholine      | Phosphatidylcholines |           | Level 2   |
| PC aa C38:5  | PC(16:0/22:5(7Z,10Z,13Z,16Z,19Z))                                     | Phosphatidylcholines | HMDB07990 | Level 2   |
| PC aa C38:5  | C(22:5;7Z,10Z,13Z,16Z,19Z-pentaenoyl/16:0) aa Phosphatidylcholine     | Phosphatidylcholines |           | Level 2   |
| PC aa C38:6  | C(16:0/22:6;4E,7E,10E,13E,16E,19E-hexaenoyl) aa L-Phosphatidylcholine | Phosphatidylcholines |           | Level 2   |
| PC aa C38:6  | PC(22:6(4Z,7Z,10Z,13Z,16Z,19Z)/16:0)                                  | Phosphatidylcholines | HMDB08725 | Level 2   |
| PC aa C38:6  | C(16:0/22:6;4Z,7Z,10Z,13Z,16Z,19Z-hexaenoyl) aa Phosphatidylcholine   | Phosphatidylcholines |           | Level 2   |
| PC aa C38:6  | PC(20:5(5Z,8Z,11Z,14Z,17Z)/18:1(9Z))                                  | Phosphatidylcholines | HMDB08499 | Level 2   |
| PC aa C38:6  | PC(20:4(5Z,8Z,11Z,14Z)/18:2(9Z,12Z))                                  | Phosphatidylcholines | HMDB08434 | Level 2   |

## Metabolomics

| Abbreviation | Name                                                                        | Metabolite class     | HMDB ID   | MSI level |
|--------------|-----------------------------------------------------------------------------|----------------------|-----------|-----------|
| PC aa C38:6  | PC(18:2(9Z,12Z)/20:4(5Z,8Z,11Z,14Z))                                        | Phosphatidylcholines | HMDB08147 | Level 2   |
| PC aa C38:6  | C(20:4;5Z,8Z,11Z,14Z-tetraenoyl/18:2;9Z,12Z-dienoyl) aa Phosphatidylcholine | Phosphatidylcholines |           | Level 2   |
| PC aa C38:6  | PC(18:1(11Z)/20:5(5Z,8Z,11Z,14Z,17Z))                                       | Phosphatidylcholines | HMDB08083 | Level 2   |
| PC aa C38:6  | PC(18:1(9Z)/20:5(5Z,8Z,11Z,14Z,17Z))                                        | Phosphatidylcholines | HMDB08116 | Level 2   |
| PC aa C38:6  | C(20:5;5Z,8Z,11Z,14Z,17Z-pentaenoyl/18:1;9Z-enoyl) aa Phosphatidylcholine   | Phosphatidylcholines |           | Level 2   |
| PC aa C38:6  | C(22:6;3Z,6Z,9Z,12Z,15Z,18E-hexaenoyl/16:0) aa Phosphatidylcholine          | Phosphatidylcholines |           | Level 2   |
| PC aa C38:6  | C(22:6;4E,7E,10E,13E,16E,19E-hexaenoyl/16:0) aa L-Phosphatidylcholine       | Phosphatidylcholines |           | Level 2   |
| PC aa C38:6  | C(22:6;4E,7E,10E,13E,16E,19E-hexaenoyl/16:0) aa Phosphatidylcholine         | Phosphatidylcholines |           | Level 2   |
| PC aa C38:6  | C(22:6;4Z,7Z,10Z,13Z,16Z,19Z-hexaenoyl/16:0) aa D-Phosphatidylcholine       | Phosphatidylcholines |           | Level 2   |
| PC aa C38:6  | PC(16:0/22:6(4Z,7Z,10Z,13Z,16Z,19Z))                                        | Phosphatidylcholines | HMDB07991 | Level 2   |
| PC aa C38:6  | C(22:6;4Z,7Z,10Z,13Z,16Z,19Z-hexaenoyl/16:0) aa Phosphatidylcholine         | Phosphatidylcholines |           | Level 2   |
| PC aa C40:1  | PC(20:0/20:1(11Z))                                                          | Phosphatidylcholines | HMDB08275 | Level 2   |
| PC aa C40:1  | C(20:1;13Z-enoyl/20:0) aa L-Phosphatidylcholine                             | Phosphatidylcholines |           | Level 2   |
| PC aa C40:1  | C(20:1;5Z-enoyl/20:0) aa L-Phosphatidylcholine                              | Phosphatidylcholines |           | Level 2   |
| PC aa C40:1  | C(20:1;8Z-enoyl/20:0) aa L-Phosphatidylcholine                              | Phosphatidylcholines |           | Level 2   |
| PC aa C40:1  | C(22:0/18:1;11E-enoyl) aa L-Phosphatidylcholine                             | Phosphatidylcholines |           | Level 2   |
| PC aa C40:1  | PC(18:1(11Z)/22:0)                                                          | Phosphatidylcholines | HMDB08084 | Level 2   |
| PC aa C40:1  | C(22:0/18:1;9E-enoyl) aa Phosphatidylcholine                                | Phosphatidylcholines |           | Level 2   |
| PC aa C40:1  | PC(18:1(9Z)/22:0)                                                           | Phosphatidylcholines | HMDB08117 | Level 2   |
| PC aa C40:1  | C(22:0/18:1;9Z-enoyl) aa Phosphatidylcholine                                | Phosphatidylcholines |           | Level 2   |
| PC aa C40:1  | PC(18:0/22:1(13Z))                                                          | Phosphatidylcholines | HMDB08052 | Level 2   |
| PC aa C40:1  | C(24:1;E15-enoyl/16:0) aa Phosphatidylcholine                               | Phosphatidylcholines |           | Level 2   |
| PC aa C40:1  | C(24:1;Z15-enoyl/16:0) aa D-Phosphatidylcholine                             | Phosphatidylcholines |           | Level 2   |
| PC aa C40:1  | PC(16:0/24:1(15Z))                                                          | Phosphatidylcholines | HMDB07993 | Level 2   |
| PC aa C40:1  | C(24:1;Z15-enoyl/16:0) aa Phosphatidylcholine                               | Phosphatidylcholines |           | Level 2   |
| PC aa C40:2  | C(20:1;11E-enoyl/20:1;11E-enoyl) aa L-Phosphatidylcholine                   | Phosphatidylcholines |           | Level 2   |
| PC aa C40:2  | PC(20:1(11Z)/20:1(11Z))                                                     | Phosphatidylcholines | HMDB08308 | Level 2   |
| PC aa C40:2  | C(20:1;11Z-enoyl/20:1;11Z-enoyl) aa Phosphatidylcholine                     | Phosphatidylcholines |           | Level 2   |
| PC aa C40:2  | C(20:1;9E-enoyl/20:1;9E-enoyl) aa L-Phosphatidylcholine                     | Phosphatidylcholines |           | Level 2   |
| PC aa C40:2  | C(20:1;9Z-enoyl/20:1;9Z-enoyl) aa L-Phosphatidylcholine                     | Phosphatidylcholines |           | Level 2   |
| PC aa C40:2  | C(20:1;9Z-enoyl/20:1;9Z-enoyl) aa Phosphatidylcholine                       | Phosphatidylcholines |           | Level 2   |
| PC aa C40:2  | PC(20:0/20:2(11Z,14Z))                                                      | Phosphatidylcholines | HMDB08276 | Level 2   |
| PC aa C40:3  | C(20:3;11Z,14Z,17Z-trienoyl/20:0) aa L-Phosphatidylcholine                  | Phosphatidylcholines |           | Level 2   |
| PC aa C40:3  | C(22:3;10Z,13Z,16Z-trienoyl/18:0) aa L-Phosphatidylcholine                  | Phosphatidylcholines |           | Level 2   |



## Metabolomics

| Abbreviation | Name                                                                   | Metabolite class     | HMDB ID   | MSI level |
|--------------|------------------------------------------------------------------------|----------------------|-----------|-----------|
| PC aa C40:4  | PC(22:4(7Z,10Z,13Z,16Z)/18:0)                                          | Phosphatidylcholines | HMDB08628 | Level 2   |
| PC aa C40:4  | C(20:2;11E,14E-dienoyl/20:2;11E,14E-dienoyl) aa L-Phosphatidylcholine  | Phosphatidylcholines |           | Level 2   |
| PC aa C40:4  | C(20:2;2E,4E-dienoyl/20:2;2E,4E-dienoyl) aa D-Phosphatidylcholine      | Phosphatidylcholines |           | Level 2   |
| PC aa C40:4  | PC(20:0/20:4(5Z,8Z,11Z,14Z))                                           | Phosphatidylcholines | HMDB08279 | Level 2   |
| PC aa C40:4  | PC(18:0/22:4(7Z,10Z,13Z,16Z))                                          | Phosphatidylcholines | HMDB08054 | Level 2   |
| PC aa C40:4  | C(22:3;7Z,10Z,13Z,16Z-tetraenoyl/18:0) aa Phosphatidylcholine          | Phosphatidylcholines |           | Level 2   |
| PC aa C40:5  | PC(18:1(9Z)/22:4(7Z,10Z,13Z,16Z))                                      | Phosphatidylcholines | HMDB08120 | Level 2   |
| PC aa C40:5  | C(22:5;4E,7E,10E,13E,16E-pentaenoyl/18:0) aa Phosphatidylcholine       | Phosphatidylcholines |           | Level 2   |
| PC aa C40:5  | PC(18:0/22:5(4Z,7Z,10Z,13Z,16Z))                                       | Phosphatidylcholines | HMDB08055 | Level 2   |
| PC aa C40:5  | C(22:5;4Z,7Z,10Z,13Z,16Z-pentaenoyl/18:0) aa Phosphatidylcholine       | Phosphatidylcholines |           | Level 2   |
| PC aa C40:5  | PC(18:0/22:5(7Z,10Z,13Z,16Z,19Z))                                      | Phosphatidylcholines | HMDB08056 | Level 2   |
| PC aa C40:5  | C(22:5;7Z,10Z,13Z,16Z,19Z-pentaenoyl/18:0) aa Phosphatidylcholine      | Phosphatidylcholines |           | Level 2   |
| PC aa C40:6  | PC(18:1(11Z)/22:5(7Z,10Z,13Z,16Z,19Z))                                 | Phosphatidylcholines | HMDB08089 | Level 2   |
| PC aa C40:6  | PC(18:1(9Z)/22:5(7Z,10Z,13Z,16Z,19Z))                                  | Phosphatidylcholines | HMDB08122 | Level 2   |
| PC aa C40:6  | C(22:6;4E,7E,10E,13E,16E,19E-hexaenoyl/18:0) aa Phosphatidylcholine    | Phosphatidylcholines |           | Level 2   |
| PC aa C40:6  | PC(18:0/22:6(4Z,7Z,10Z,13Z,16Z,19Z))                                   | Phosphatidylcholines | HMDB08057 | Level 2   |
| PC aa C40:6  | C(22:6;4Z,7Z,10Z,13Z,16Z,19Z-hexaenoyl/18:0) aa Phosphatidylcholine    | Phosphatidylcholines |           | Level 2   |
| PC aa C40:6  | C(22:6;9Z,11Z,13Z,15Z,17Z,19E-hexaenoyl/18:0) aa L-Phosphatidylcholine | Phosphatidylcholines |           | Level 2   |
| PC aa C42:0  | C(16:0/26:0) aa L-Phosphatidylcholine                                  | Phosphatidylcholines |           | Level 2   |
| PC aa C42:0  | C(17:0/25:0) aa L-Phosphatidylcholine                                  | Phosphatidylcholines |           | Level 2   |
| PC aa C42:0  | PC(24:0/18:0)                                                          | Phosphatidylcholines | HMDB08760 | Level 2   |
| PC aa C42:0  | C(19:0/23:0) aa Phosphatidylcholine                                    | Phosphatidylcholines |           | Level 2   |
| PC aa C42:0  | PC(22:0/20:0)                                                          | Phosphatidylcholines | HMDB08537 | Level 2   |
| PC aa C42:0  | C(21:0/21:0) aa L-Phosphatidylcholine                                  | Phosphatidylcholines |           | Level 2   |
| PC aa C42:0  | C(21:0/21:0) aa Phosphatidylcholine                                    | Phosphatidylcholines |           | Level 2   |
| PC aa C42:0  | PC(20:0/22:0)                                                          | Phosphatidylcholines | HMDB08282 | Level 2   |
| PC aa C42:0  | C(23:0/19:0) aa Phosphatidylcholine                                    | Phosphatidylcholines |           | Level 2   |
| PC aa C42:0  | PC(18:0/24:0)                                                          | Phosphatidylcholines | HMDB08058 | Level 2   |
| PC aa C42:0  | C(25:0/17:0) aa Phosphatidylcholine                                    | Phosphatidylcholines |           | Level 2   |
| PC aa C42:0  | C(26:0/16:0) aa L-Phosphatidylcholine                                  | Phosphatidylcholines |           | Level 2   |
| PC aa C42:0  | C(26:0/16:0) aa Phosphatidylcholine                                    | Phosphatidylcholines |           | Level 2   |
| PC aa C42:1  | C(18:1;6Z-enoyl/24:0) aa L-Phosphatidylcholine                         | Phosphatidylcholines |           | Level 2   |
| PC aa C42:1  | PC(24:0/18:1(9Z))                                                      | Phosphatidylcholines | HMDB08762 | Level 2   |
| PC aa C42:1  | PC(22:0/20:1(11Z))                                                     | Phosphatidylcholines | HMDB08538 | Level 2   |
| PC aa C42:1  | C(22:0/20:1;11E-enoyl) aa L-Phosphatidylcholine                        | Phosphatidylcholines |           | Level 2   |
| PC aa C42:1  | C(22:0/20:1;11Z-enoyl) aa L-Phosphatidylcholine                        | Phosphatidylcholines |           | Level 2   |
| PC aa C42:1  | PC(20:0/22:1(13Z))                                                     | Phosphatidylcholines | HMDB08283 | Level 2   |

## Metabolomics

| Abbreviation | Name                                                                | Metabolite class     | HMDB ID   | MSI level |
|--------------|---------------------------------------------------------------------|----------------------|-----------|-----------|
| PC aa C42:1  | PC(18:1(9Z)/24:0)                                                   | Phosphatidylcholines | HMDB08124 | Level 2   |
| PC aa C42:1  | PC(18:0/24:1(15Z))                                                  | Phosphatidylcholines | HMDB08059 | Level 2   |
| PC aa C42:2  | C(21:1;12Z-enoyl/21:1;12Z-enoyl) aa Phosphatidylcholine             | Phosphatidylcholines |           | Level 2   |
| PC aa C42:2  | C(26:2;5Z,9Z-dienoyl/16:0) aa L-Phosphatidylcholine                 | Phosphatidylcholines |           | Level 2   |
| PC aa C42:2  | C16:0/26:1;5Z,9Z-dienoyl) aa L-Phosphatidylcholine                  | Phosphatidylcholines |           | Level 2   |
| PC aa C42:4  | Phosphatidylcholine with diacyl residue sum C42:4                   | Phosphatidylcholines |           | Level 2   |
| PC aa C42:5  | PC(20:0/22:5(7Z,10Z,13Z,16Z,19Z))                                   | Phosphatidylcholines | HMDB08287 | Level 2   |
| PC aa C42:6  | C(22:6;4Z,7Z,10Z,13Z,16Z,19Z-hexaenoyl/20:0) aa Phosphatidylcholine | Phosphatidylcholines |           | Level 2   |
| PC aa C42:6  | PC(20:0/22:6(4Z,7Z,10Z,13Z,16Z,19Z))                                | Phosphatidylcholines | HMDB08288 | Level 2   |
| PC ae C30:0  | C(16:0/e14:0) ae Phosphatidylcholine                                | Phosphatidylcholines |           | Level 2   |
| PC ae C30:0  | PC(o-14:0/16:0)                                                     | Phosphatidylcholines | HMDB13341 | Level 2   |
| PC ae C30:1  | PC(o-14:0/16:1(9Z))                                                 | Phosphatidylcholines | HMDB13402 | Level 2   |
| PC ae C30:2  | Phosphatidylcholine with acyl-alkyl residue sum C30:2               | Phosphatidylcholines |           | Level 2   |
| PC ae C32:1  | C(18:1;9Z-enoyl/e14:0) ae L-Phosphatidylcholine                     | Phosphatidylcholines |           | Level 2   |
| PC ae C32:2  | C(18:1;9Z-enoyl/e14:1;1Z-en) ae L-Phosphatidylcholine               | Phosphatidylcholines |           | Level 2   |
| PC ae C32:2  | C(18:2;9Z,12Z-dienoyl/e14:0) ae L-Phosphatidylcholine               | Phosphatidylcholines |           | Level 2   |
| PC ae C34:0  | C(16:0/e18:0) ae D-Phosphatidylcholine                              | Phosphatidylcholines |           | Level 2   |
| PC ae C34:0  | C(16:0/e18:0) ae L-Phosphatidylcholine                              | Phosphatidylcholines |           | Level 2   |
| PC ae C34:0  | C(16:0/e18:0) ae Phosphatidylcholine                                | Phosphatidylcholines |           | Level 2   |
| PC ae C34:0  | C(17:0/e17:0) ae L-Phosphatidylcholine                              | Phosphatidylcholines |           | Level 2   |
| PC ae C34:0  | C(18:0/e16:0) ae D-Phosphatidylcholine                              | Phosphatidylcholines |           | Level 2   |
| PC ae C34:0  | PC(o-16:0/18:0)                                                     | Phosphatidylcholines | HMDB13405 | Level 2   |
| PC ae C34:0  | C(18:0/e16:0) ae Phosphatidylcholine                                | Phosphatidylcholines |           | Level 2   |
| PC ae C34:0  | C(e16:0/18:0) ae Phosphatidylcholine                                | Phosphatidylcholines |           | Level 2   |
| PC ae C34:1  | C(16:0;e18:1;9Z-en) ae Phosphatidylcholine                          | Phosphatidylcholines |           | Level 2   |
| PC ae C34:1  | C(16:1;9Z-enoyl/e18:0) ae L-Phosphatidylcholine                     | Phosphatidylcholines |           | Level 2   |
| PC ae C34:1  | C(18:1;9E-enoyl/e16:0) ae Phosphatidylcholine                       | Phosphatidylcholines |           | Level 2   |
| PC ae C34:1  | C(18:1;9Z-enoyl/e16:0) ae D-Phosphatidylcholine                     | Phosphatidylcholines |           | Level 2   |
| PC ae C34:1  | C(18:1;9Z-enoyl/e16:0) ae L-Phosphatidylcholine                     | Phosphatidylcholines |           | Level 2   |
| PC ae C34:1  | C(18:1;9Z-enoyl/e16:0) ae Phosphatidylcholine                       | Phosphatidylcholines |           | Level 2   |
| PC ae C34:2  | PC(O-16:0/18:2(9Z,12Z))                                             | Phosphatidylcholines | HMDB11151 | Level 2   |
| PC ae C34:2  | C(18:1;9Z,12Z-dienoyl/e16:0) ae Phosphatidylcholine                 | Phosphatidylcholines |           | Level 2   |
| PC ae C34:2  | C(18:1;9Z-enoyl/e16:1;1E-en) ae Phosphatidylcholine                 | Phosphatidylcholines |           | Level 2   |
| PC ae C34:2  | C(18:1;9Z-enoyl/e16:1;1Z-en) ae L-Phosphatidylcholine               | Phosphatidylcholines |           | Level 2   |
| PC ae C34:2  | C(18:1;9Z-enoyl/e16:1;1Z-en) ae Phosphatidylcholine                 | Phosphatidylcholines |           | Level 2   |
| PC ae C34:3  | C(18:1;6Z,9Z,12Z-trienoyl/e16:0) ae L-                              | Phosphatidylcholines |           | Level 2   |

## Metabolomics

| Abbreviation | Name                                                                  | Metabolite class     | HMDB ID   | MSI level |
|--------------|-----------------------------------------------------------------------|----------------------|-----------|-----------|
|              | Phosphatidylcholine                                                   |                      |           |           |
| PC ae C34:3  | C(18:1;9Z,12Z,15Z-trienoyl/e16:0) ae D-Phosphatidylcholine            | Phosphatidylcholines |           | Level 2   |
| PC ae C34:3  | C(18:1;9Z,12Z,15Z-trienoyl/e16:0) ae L-Phosphatidylcholine            | Phosphatidylcholines |           | Level 2   |
| PC ae C34:3  | PC(P-16:0/18:2(9Z,12Z))                                               | Phosphatidylcholines | HMDB11211 | Level 2   |
| PC ae C36:0  | C(16:0/e20:0) ae L-Phosphatidylcholine                                | Phosphatidylcholines |           | Level 2   |
| PC ae C36:0  | C(18:0/e18:0) ae D-Phosphatidylcholine                                | Phosphatidylcholines |           | Level 2   |
| PC ae C36:0  | PC(o-18:0/18:0)                                                       | Phosphatidylcholines | HMDB13417 | Level 2   |
| PC ae C36:0  | C(18:0/e18:0) ae Phosphatidylcholine                                  | Phosphatidylcholines |           | Level 2   |
| PC ae C36:0  | PC(o-16:0/20:0)                                                       | Phosphatidylcholines | HMDB13406 | Level 2   |
| PC ae C36:0  | C(22:0/e14:0) ae L-Phosphatidylcholine                                | Phosphatidylcholines |           | Level 2   |
| PC ae C36:1  | C(20:1;9Z-enoyl/e16:0) ae L-Phosphatidylcholine                       | Phosphatidylcholines |           | Level 2   |
| PC ae C36:2  | PC(P-18:0/18:1(9Z))                                                   | Phosphatidylcholines | HMDB11243 | Level 2   |
| PC ae C36:3  | C(20:3;8Z,11Z,14Z-trienoyl/e16:0) ae L-Phosphatidylcholine            | Phosphatidylcholines |           | Level 2   |
| PC ae C36:4  | C(20:4;5E,8E,11E,14E-tetraenoyl/e16:0) ae L-Phosphatidylcholine       | Phosphatidylcholines |           | Level 2   |
| PC ae C36:4  | C(20:4;5E,8E,11E,14E-tetraenoyl/e16:0) ae Phosphatidylcholine         | Phosphatidylcholines |           | Level 2   |
| PC ae C36:4  | C(20:4;5Z,8Z,11Z,14Z-tetraenoyl/e16:0) ae L-Phosphatidylcholine       | Phosphatidylcholines |           | Level 2   |
| PC ae C36:4  | C(20:4;5Z,8Z,11Z,14Z-tetraenoyl/e16:0) ae Phosphatidylcholine         | Phosphatidylcholines |           | Level 2   |
| PC ae C36:5  | PC(P-16:0/20:4(5Z,8Z,11Z,14Z))                                        | Phosphatidylcholines | HMDB11220 | Level 2   |
| PC ae C36:5  | C(20:5;(5Z,8Z,11Z,14Z,17Z)-pentaenoyl/e16:0) ae L-Phosphatidylcholine | Phosphatidylcholines |           | Level 2   |
| PC ae C38:0  | PC(o-18:0/20:0)                                                       | Phosphatidylcholines | HMDB13419 | Level 2   |
| PC ae C38:0  | C(20:0/e18:0) ae Phosphatidylcholine                                  | Phosphatidylcholines |           | Level 2   |
| PC ae C38:0  | PC(o-16:0/22:0)                                                       | Phosphatidylcholines | HMDB13408 | Level 2   |
| PC ae C38:0  | C(22:0/e16:0) ae Phosphatidylcholine                                  | Phosphatidylcholines |           | Level 2   |
| PC ae C38:1  | C(20:1;9Z-enoyl/e18:0) ae L-Phosphatidylcholine                       | Phosphatidylcholines |           | Level 2   |
| PC ae C38:2  | Phosphatidylcholine with acyl-alkyl residue sum C38:2                 | Phosphatidylcholines |           | Level 2   |
| PC ae C38:3  | Phosphatidylcholine with acyl-alkyl residue sum C38:3                 | Phosphatidylcholines |           | Level 2   |
| PC ae C38:4  | C(20:4;5E,8E,11E,14E-tetraenoyl/e18:0) ae L-Phosphatidylcholine       | Phosphatidylcholines |           | Level 2   |
| PC ae C38:4  | C(20:4;5E,8E,11E,14E-tetraenoyl/e18:0) ae Phosphatidylcholine         | Phosphatidylcholines |           | Level 2   |
| PC ae C38:4  | PC(o-18:0/20:4(8Z,11Z,14Z,17Z))                                       | Phosphatidylcholines | HMDB13420 | Level 2   |
| PC ae C38:4  | C(20:4;5Z,8Z,11Z,14Z-tetraenoyl/e18:0) ae Phosphatidylcholine         | Phosphatidylcholines |           | Level 2   |
| PC ae C38:4  | C(22:4;7Z,10Z,13Z,16Z-tetraenoyl/e16:0) ae Phosphatidylcholine        | Phosphatidylcholines |           | Level 2   |
| PC ae C38:5  | PC(o-18:1(9Z)/20:4(8Z,11Z,14Z,17Z))                                   | Phosphatidylcholines | HMDB13432 | Level 2   |
| PC ae C38:5  | C(20:4;5Z,8Z,11Z,14Z-tetraenoyl/e18:1;1Z-en) ae L-Phosphatidylcholine | Phosphatidylcholines |           | Level 2   |
| PC ae C38:5  | C(20:5;5Z,8Z,11Z,14Z,17Z)-pentaenoyl/e18:0) ae L-Phosphatidylcholine  | Phosphatidylcholines |           | Level 2   |
| PC ae C38:5  | C(22:5;7Z,10Z,13Z,16Z,19Z)-pentaenoyl/e16:0)                          | Phosphatidylcholines |           | Level 2   |

## Metabolomics

| Abbreviation  | Name                                                                  | Metabolite class     | HMDB ID   | MSI level |
|---------------|-----------------------------------------------------------------------|----------------------|-----------|-----------|
|               | ae L-Phosphatidylcholine                                              |                      |           |           |
| PC ae C38:5   | C(22:5;7Z,10Z,13Z,16Z,19Z-pentaenoyl/e16:0) ae Phosphatidylcholine    | Phosphatidylcholines |           | Level 2   |
| PC ae C38:6   | PC(o-16:0/22:6(4Z,7Z,10Z,13Z,16Z,19Z))                                | Phosphatidylcholines | HMDB13409 | Level 2   |
| PC ae C38:6   | C(22:6;4Z,7Z,10Z,13Z,16Z,19Z-pentaenoyl/e16:0) ae Phosphatidylcholine | Phosphatidylcholines |           | Level 2   |
| PC ae C40:0   | PC(o-18:0/22:0)                                                       | Phosphatidylcholines | HMDB13421 | Level 2   |
| PC ae C40:0   | C(22:0/e18:0) ae Phosphatidylcholine                                  | Phosphatidylcholines |           | Level 2   |
| PC ae C40:1   | Phosphatidylcholine with acyl-alkyl residue sum C40:1                 | Phosphatidylcholines |           | Level 2   |
| PC ae C40:2   | Phosphatidylcholine with acyl-alkyl residue sum C40:2                 | Phosphatidylcholines |           | Level 2   |
| PC ae C40:3   | Phosphatidylcholine with acyl-alkyl residue sum C40:3                 | Phosphatidylcholines |           | Level 2   |
| PC ae C40:4   | Phosphatidylcholine with acyl-alkyl residue sum C40:4                 | Phosphatidylcholines |           | Level 2   |
| PC ae C40:5   | C(22:5;4Z,7Z,10Z,13Z,16Z-pentaenoyl/e18:0) ae L-Phosphatidylcholine   | Phosphatidylcholines |           | Level 2   |
| PC ae C40:5   | C(22:5;7E,10E,13E,16E,19E-pentaenoyl/e18:0) ae Phosphatidylcholine    | Phosphatidylcholines |           | Level 2   |
| PC ae C40:5   | C(22:5;7Z,10Z,13Z,16Z,19Z-pentaenoyl/e18:0) ae L-Phosphatidylcholine  | Phosphatidylcholines |           | Level 2   |
| PC ae C40:6   | PC(o-18:0/22:6(4Z,7Z,10Z,13Z,16Z,19Z))                                | Phosphatidylcholines | HMDB13422 | Level 2   |
| PC ae C40:6   | C(22:5;4Z,7Z,10Z,13Z,16Z,19Z-hexaenoyl/e18:0) ae Phosphatidylcholine  | Phosphatidylcholines |           | Level 2   |
| PC ae C42:0   | PC(o-20:0/22:0)                                                       | Phosphatidylcholines | HMDB13443 | Level 2   |
| PC ae C42:1   | Phosphatidylcholine with acyl-alkyl residue sum C42:1                 | Phosphatidylcholines |           | Level 2   |
| PC ae C42:2   | Phosphatidylcholine with acyl-alkyl residue sum C42:2                 | Phosphatidylcholines |           | Level 2   |
| PC ae C42:3   | Phosphatidylcholine with acyl-alkyl residue sum C42:3                 | Phosphatidylcholines |           | Level 2   |
| PC ae C42:4   | Phosphatidylcholine with acyl-alkyl residue sum C42:4                 | Phosphatidylcholines |           | Level 2   |
| PC ae C42:5   | Phosphatidylcholine with acyl-alkyl residue sum C42:5                 | Phosphatidylcholines |           | Level 2   |
| PC ae C44:3   | Phosphatidylcholine with acyl-alkyl residue sum C44:3                 | Phosphatidylcholines |           | Level 2   |
| PC ae C44:4   | Phosphatidylcholine with acyl-alkyl residue sum C44:4                 | Phosphatidylcholines |           | Level 2   |
| PC ae C44:5   | Phosphatidylcholine with acyl-alkyl residue sum C44:5                 | Phosphatidylcholines |           | Level 2   |
| PC ae C44:6   | Phosphatidylcholine with acyl-alkyl residue sum C44:6                 | Phosphatidylcholines |           | Level 2   |
| SM (OH) C14:1 | Hydroxysphingomyelin with acyl residue sum C14:1                      | Sphingomyelins       |           | Level 2   |
| SM (OH) C16:1 | Hydroxysphingomyelin with acyl residue sum C16:1                      | Sphingomyelins       |           | Level 2   |
| SM (OH) C22:1 | Hydroxysphingomyelin with acyl residue sum C22:1                      | Sphingomyelins       |           | Level 2   |
| SM (OH) C22:2 | Hydroxysphingomyelin with acyl residue sum C22:2                      | Sphingomyelins       |           | Level 2   |
| SM (OH) C24:1 | Hydroxysphingomyelin with acyl residue sum C24:1                      | Sphingomyelins       |           | Level 2   |
| SM C16:0      | C16:0 Sphingomyelin                                                   | Sphingomyelins       |           | Level 2   |
| SM C16:1      | Sphingomyelin with acyl residue sum C16:1                             | Sphingomyelins       |           | Level 2   |
| SM C18:0      | C18:0 Sphingomyelin                                                   | Sphingomyelins       |           | Level 2   |

## Metabolomics

| Abbreviation | Name                                      | Metabolite class | HMDB ID   | MSI level |
|--------------|-------------------------------------------|------------------|-----------|-----------|
| SM C18:1     | C18:1;11Z-enoyl Sphingomyelin             | Sphingomyelins   | HMDB12100 | Level 2   |
| SM C18:1     | C18:1;9Z-enoyl Sphingomyelin              | Sphingomyelins   | HMDB12101 | Level 2   |
| SM C20:2     | Sphingomyelin with acyl residue sum C20:2 | Sphingomyelins   |           | Level 2   |
| SM C22:3     | Sphingomyelin with acyl residue sum C22:3 | Sphingomyelins   |           | Level 2   |
| SM C24:0     | C24:0 Sphingomyelin                       | Sphingomyelins   |           | Level 2   |
| SM C24:1     | SM(d18:1/24:1(15Z))                       | Sphingomyelins   | HMDB12107 | Level 2   |
| SM C26:0     | C26:0 Sphingomyelin                       | Sphingomyelins   |           | Level 2   |
| SM C26:1     | SM(d18:0/26:1(17Z))                       | Sphingomyelins   | HMDB13461 | Level 2   |
| H1           | Aldohexose                                | Hexoses          |           | Level 2   |
| H1           | D-Galactose                               | Hexoses          | HMDB00143 | Level 2   |
| H1           | Alpha-D-Glucose                           | Hexoses          | HMDB03345 | Level 2   |
| H1           | alpha-D-Mannopyranose                     | Hexoses          |           | Level 2   |
| H1           | Alpha-L-Galactopyranose                   | Hexoses          |           | Level 2   |
| H1           | Beta-D-Galactose                          | Hexoses          | HMDB03449 | Level 2   |
| H1           | Beta-D-Glucose                            | Hexoses          | HMDB00516 | Level 2   |
| H1           | D-Allopyranose                            | Hexoses          |           | Level 2   |
| H1           | D-Allose                                  | Hexoses          |           | Level 2   |
| H1           | D-Altropyranose                           | Hexoses          |           | Level 2   |
| H1           | D-Altrose                                 | Hexoses          |           | Level 2   |
| H1           | D-Erythrohexulose                         | Hexoses          |           | Level 2   |
| H1           | D-Fructose                                | Hexoses          | HMDB00660 | Level 2   |
| H1           | D-Fructopyranose                          | Hexoses          |           | Level 2   |
| H1           | D-Fructose                                | Hexoses          |           | Level 2   |
| H1           | D-Galactose                               | Hexoses          |           | Level 2   |
| H1           | D-Glucose                                 | Hexoses          | HMDB00122 | Level 2   |
| H1           | D-Gulopyranose                            | Hexoses          |           | Level 2   |
| H1           | D-Gulose                                  | Hexoses          |           | Level 2   |
| H1           | D-Idopyranose                             | Hexoses          |           | Level 2   |
| H1           | D-Idose                                   | Hexoses          |           | Level 2   |
| H1           | D-Mannose                                 | Hexoses          | HMDB00169 | Level 2   |
| H1           | D-Psicopyranose                           | Hexoses          |           | Level 2   |
| H1           | D-Psicose                                 | Hexoses          |           | Level 2   |
| H1           | D-Sorbopyranose                           | Hexoses          |           | Level 2   |
| H1           | D-Sorbose                                 | Hexoses          |           | Level 2   |
| H1           | D-Tagatofuranose                          | Hexoses          |           | Level 2   |
| H1           | D-Tagatopyranose                          | Hexoses          |           | Level 2   |
| H1           | D-Tagatose                                | Hexoses          | HMDB03418 | Level 2   |
| H1           | D-Talopyranose                            | Hexoses          |           | Level 2   |
| H1           | D-Talose                                  | Hexoses          |           | Level 2   |
| H1           | Gulose                                    | Hexoses          |           | Level 2   |
| H1           | Ketohexose                                | Hexoses          |           | Level 2   |
| H1           | L-Allopyranose                            | Hexoses          |           | Level 2   |

*Metabolomics*

| <b>Abbreviation</b> | <b>Name</b>      | <b>Metabolite class</b> | <b>HMDB ID</b> | <b>MSI level</b> |
|---------------------|------------------|-------------------------|----------------|------------------|
| H1                  | L-Allose         | Hexoses                 |                | Level 2          |
| H1                  | L-Altrose        | Hexoses                 |                | Level 2          |
| H1                  | L-Fructofuranose | Hexoses                 |                | Level 2          |
| H1                  | L-Fructopyranose | Hexoses                 |                | Level 2          |
| H1                  | L-Galactose      | Hexoses                 |                | Level 2          |
| H1                  | L-Glucose        | Hexoses                 |                | Level 2          |
| H1                  | L-Gulose         | Hexoses                 | HMDB12326      | Level 2          |
| H1                  | L-Gulose         | Hexoses                 |                | Level 2          |
| H1                  | L-Idose          | Hexoses                 |                | Level 2          |
| H1                  | L-Mannopyranose  | Hexoses                 |                | Level 2          |
| H1                  | L-Mannose        | Hexoses                 |                | Level 2          |
| H1                  | L-Sorbopyranose  | Hexoses                 |                | Level 2          |
| H1                  | L-Sorbose        | Hexoses                 |                | Level 2          |
| H1                  | L-Talose         | Hexoses                 |                | Level 2          |

**Table S-2 Tissue metabolite concentrations at optimal extraction conditions.**

The table lists the mean ( $\pm$  standard deviation) tissue metabolite concentrations in pmol/mg tissue for each murine tissue type measured at the optimal extraction condition (summarized in Table 2 of the manuscript). The values were rounded to the first decimal. Metabolite abbreviations are explained in Table S-1. Metabolite concentrations below the LOD or higher than the ULOQ are indicated by '<LOD' or '>ULOQ', respectively. Abbreviations for extraction solvents are as follows: MeOH, 100% methanol; EtOH/PB, 85/15 (v/v) mixture of ethanol and 10 mM phosphate buffer pH 7.5. Tissue to solvent ratios are denoted as 1:X, indicating 1 mg of tissue was homogenized with X  $\mu$ L solvent.

| Metabolite abbreviation | Liver           | Kidney          | Skeletal muscle | Fat             | Brain          | Pituitary gland | Lung             | Bone            | Adrenal gland   | Testis          | Ovary           |
|-------------------------|-----------------|-----------------|-----------------|-----------------|----------------|-----------------|------------------|-----------------|-----------------|-----------------|-----------------|
|                         | EtOH/PB 1:3     | MeOH 1:3        | EtOH/PB 1:3     | EtOH/PB 1:6     | EtOH/PB 1:6    | MeOH 1:12       | EtOH/PB 1:3      | EtOH/PB 1:6     | EtOH/PB 1:12    | MeOH 1:6        | EtOH/PB 1:3     |
| C0                      | 203.5 $\pm$ 7.9 | 329.5 $\pm$ 5.9 | 129.0 $\pm$ 4.3 | 144.3 $\pm$ 3.3 | 86.1 $\pm$ 1.8 | 123.3 $\pm$ 6.2 | 582.0 $\pm$ 25.2 | 132.0 $\pm$ 3.0 | 233.0 $\pm$ 8.4 | 149.8 $\pm$ 5.3 | 143.0 $\pm$ 4.1 |
| C2                      | 115.5 $\pm$ 4.7 | 91.1 $\pm$ 2.5  | 72.2 $\pm$ 0.5  | 32.1 $\pm$ 1.3  | 32.4 $\pm$ 0.8 | 39.5 $\pm$ 1.0  | 289.0 $\pm$ 7.7  | 125.5 $\pm$ 2.5 | 41.0 $\pm$ 0.5  | 102.8 $\pm$ 5.9 | 115.7 $\pm$ 6.6 |
| C3                      | 8.6 $\pm$ 0.3   | 12.1 $\pm$ 0.5  | 1.7 $\pm$ 0.0   | 2.8 $\pm$ 0.0   | 1.8 $\pm$ 0.1  | 2.3 $\pm$ 0.1   | 6.1 $\pm$ 0.4    | 4.8 $\pm$ 0.2   | 5.9 $\pm$ 0.3   | 3.7 $\pm$ 0.2   | 5.5 $\pm$ 0.3   |
| C3-DC (C4-OH)           | 5.7 $\pm$ 0.1   | 2.6 $\pm$ 0.1   | 2.2 $\pm$ 0.0   | 0.9 $\pm$ 0.1   | <LOD           | <LOD            | 4.1 $\pm$ 0.1    | 1.5 $\pm$ 0.0   | <LOD            | 0.9 $\pm$ 0.1   | 2.2 $\pm$ 0.1   |
| C3-OH                   | <LOD            | 0.7 $\pm$ 0.0   | <LOD            | <LOD            | <LOD           | 2.0 $\pm$ 0.0   | <LOD             | 0.7 $\pm$ 0.4   | <LOD            | 1.0 $\pm$ 0.1   | <LOD            |
| C3:1                    | <LOD            | <LOD            | <LOD            | <LOD            | <LOD           | <LOD            | <LOD             | <LOD            | <LOD            | <LOD            | <LOD            |
| C4                      | 13.9 $\pm$ 0.3  | 8.0 $\pm$ 0.3   | 6.8 $\pm$ 0.2   | 3.6 $\pm$ 0.0   | 1.2 $\pm$ 0.0  | 2.9 $\pm$ 0.0   | 7.5 $\pm$ 0.4    | 7.1 $\pm$ 0.4   | 3.3 $\pm$ 0.1   | 5.9 $\pm$ 0.3   | 15.2 $\pm$ 0.6  |
| C4:1                    | 0.3 $\pm$ 0.01  | <LOD            | <LOD            | <LOD            | <LOD           | <LOD            | 0.1 $\pm$ 0.1    | <LOD            | <LOD            | <LOD            | 0.1 $\pm$ 0.1   |
| C5                      | 1.4 $\pm$ 0.1   | 1.7 $\pm$ 0.1   | 0.6 $\pm$ 0.0   | 0.5 $\pm$ 0.0   | 0.4 $\pm$ 0.0  | 0.7 $\pm$ 0.0   | 1.0 $\pm$ 0.1    | 2.5 $\pm$ 0.1   | 1.1 $\pm$ 0.1   | 0.6 $\pm$ 0.0   | 3.3 $\pm$ 0.2   |
| C5-DC (C6-OH)           | 1.2 $\pm$ 0.1   | 0.5 $\pm$ 0.0   | 0.3 $\pm$ 0.0   | <LOD            | <LOD           | <LOD            | 0.4 $\pm$ 0.0    | <LOD            | <LOD            | <LOD            | 0.3 $\pm$ 0.0   |
| C5-M-DC                 | 1.0 $\pm$ 0.1   | 0.3 $\pm$ 0.0   | <LOD            | <LOD            | <LOD           | <LOD            | <LOD             | <LOD            | <LOD            | <LOD            | <LOD            |
| C5-OH (C3-DC-M)         | 0.7 $\pm$ 0.0   | 1.4 $\pm$ 0.1   | 0.8 $\pm$ 0.0   | <LOD            | <LOD           | <LOD            | 0.9 $\pm$ 0.1    | <LOD            | <LOD            | <LOD            | 0.6 $\pm$ 0.1   |
| C5:1                    | <LOD            | <LOD            | 0.2 $\pm$ 0.1   | <LOD            | <LOD           | <LOD            | <LOD             | <LOD            | <LOD            | <LOD            | <LOD            |
| C5:1-DC                 | 0.1 $\pm$ 0.0   | 0.1 $\pm$ 0.0   | <LOD            | <LOD            | <LOD           | <LOD            | 0.1 $\pm$ 0.0    | <LOD            | <LOD            | <LOD            | 0.01 $\pm$ 0.0  |
| C6 (C4:1-DC)            | 1.7 $\pm$ 0.1   | 1.4 $\pm$ 0.1   | 2.0 $\pm$ 0.1   | <LOD            | <LOD           | <LOD            | 2.6 $\pm$ 0.2    | 2.3 $\pm$ 0.0   | <LOD            | 1.0 $\pm$ 0.1   | 1.3 $\pm$ 0.1   |
| C6:1                    | <LOD            | 0.2 $\pm$ 0.0   | <LOD            | <LOD            | <LOD           | <LOD            | 0.2 $\pm$ 0.0    | <LOD            | <LOD            | <LOD            | 0.2 $\pm$ 0.1   |
| C7-DC                   | 0.6 $\pm$ 0.0   | 0.2 $\pm$ 0.0   | 0.2 $\pm$ 0.0   | <LOD            | <LOD           | <LOD            | 0.3 $\pm$ 0.0    | <LOD            | <LOD            | <LOD            | 0.2 $\pm$ 0.0   |
| C8                      | <LOD            | 1.0 $\pm$ 0.0   | 1.1 $\pm$ 0.0   | <LOD            | <LOD           | <LOD            | 0.8 $\pm$ 0.0    | <LOD            | <LOD            | <LOD            | 0.9 $\pm$ 0.0   |
| C9                      | <LOD            | <LOD            | <LOD            | <LOD            | <LOD           | <LOD            | <LOD             | <LOD            | <LOD            | <LOD            | <LOD            |
| C10                     | <LOD            | 0.8 $\pm$ 0.0   | 0.9 $\pm$ 0.0   | <LOD            | <LOD           | <LOD            | <LOD             | <LOD            | <LOD            | <LOD            | <LOD            |
| C10:1                   | <LOD            | <LOD            | <LOD            | <LOD            | <LOD           | <LOD            | <LOD             | <LOD            | <LOD            | <LOD            | <LOD            |
| C10:2                   | <LOD            | 0.2 $\pm$ 0.1   | <LOD            | <LOD            | <LOD           | <LOD            | 0.2 $\pm$ 0.1    | <LOD            | 0.5 $\pm$ 0.2   | <LOD            | 0.2 $\pm$ 0.0   |
| C12                     | 0.2 $\pm$ 0.1   | 0.9 $\pm$ 0.0   | 1.5 $\pm$ 0.0   | <LOD            | <LOD           | <LOD            | 1.0 $\pm$ 0.1    | 0.8 $\pm$ 0.4   | <LOD            | 0.4 $\pm$ 0.2   | 0.6 $\pm$ 0.0   |
| C12-DC                  | <LOD            | <LOD            | <LOD            | <LOD            | <LOD           | <LOD            | <LOD             | <LOD            | <LOD            | <LOD            | <LOD            |
| C12:1                   | <LOD            | <LOD            | <LOD            | <LOD            | <LOD           | <LOD            | <LOD             | <LOD            | <LOD            | <LOD            | <LOD            |
| C14                     | 0.4 $\pm$ 0.0   | 2.1 $\pm$ 0.1   | 4.5 $\pm$ 0.1   | 0.8 $\pm$ 0.0   | 0.6 $\pm$ 0.0  | 3.4 $\pm$ 0.1   | 3.4 $\pm$ 0.1    | 4.2 $\pm$ 0.1   | 0.8 $\pm$ 0.1   | 0.9 $\pm$ 0.1   | 1.6 $\pm$ 0.1   |
| C14:1                   | 0.1 $\pm$ 0.0   | 0.6 $\pm$ 0.0   | 1.8 $\pm$ 0.0   | 0.1 $\pm$ 0.1   | 0.1 $\pm$ 0.1  | <LOD            | 0.9 $\pm$ 0.0    | 1.4 $\pm$ 0.1   | <LOD            | 0.2 $\pm$ 0.0   | 0.3 $\pm$ 0.0   |
| C14:1-OH                | 0.1 $\pm$ 0.0   | 0.2 $\pm$ 0.0   | 0.3 $\pm$ 0.0   | <LOD            | <LOD           | <LOD            | 0.5 $\pm$ 0.0    | 0.3 $\pm$ 0.0   | <LOD            | <LOD            | 0.1 $\pm$ 0.0   |
| C14:2                   | 0.1 $\pm$ 0.0   | 0.2 $\pm$ 0.0   | 0.4 $\pm$ 0.0   | <LOD            | <LOD           | <LOD            | 0.2 $\pm$ 0.0    | 0.3 $\pm$ 0.0   | <LOD            | <LOD            | 0.1 $\pm$ 0.0   |
| C14:2-OH                | <LOD            | 0.1 $\pm$ 0.0   | 0.1 $\pm$ 0.0   | <LOD            | <LOD           | <LOD            | 0.2 $\pm$ 0.0    | <LOD            | <LOD            | <LOD            | 0.1 $\pm$ 0.0   |
| C16                     | 2.1 $\pm$ 0.1   | 7.9 $\pm$ 0.2   | 24.3 $\pm$ 0.8  | 2.6 $\pm$ 0.1   | 1.5 $\pm$ 0.0  | 4.0 $\pm$ 0.2   | 9.5 $\pm$ 0.3    | 20.8 $\pm$ 0.2  | 3.7 $\pm$ 0.1   | 4.4 $\pm$ 0.2   | 7.5 $\pm$ 0.4   |

## Metabolomics

| Metabolite abbreviation | Liver          | Kidney       | Skeletal muscle | Fat            | Brain          | Pituitary gland | Lung           | Bone           | Adrenal gland   | Testis       | Ovary          |
|-------------------------|----------------|--------------|-----------------|----------------|----------------|-----------------|----------------|----------------|-----------------|--------------|----------------|
|                         | EtOH/PB<br>1:3 | MeOH<br>1:3  | EtOH/PB<br>1:3  | EtOH/PB<br>1:6 | EtOH/PB<br>1:6 | MeOH<br>1:12    | EtOH/PB<br>1:3 | EtOH/PB<br>1:6 | EtOH/PB<br>1:12 | MeOH<br>1:6  | EtOH/PB<br>1:3 |
| C16-OH                  | 0.1±0.0        | 0.4±0.0      | 0.4±0.0         | <LOD           | <LOD           | 0.3±0.0         | 0.9±0.0        | 0.3±0.0        | 0.2±0.0         | 0.2±0.0      | 0.3±0.0        |
| C16:1                   | 0.6±0.0        | 1.7±0.1      | 6.4±0.2         | 0.4±0.2        | <LOD           | <LOD            | 1.6±0.1        | 3.9±0.2        | <LOD            | 0.6±0.0      | 0.8±0.0        |
| C16:1-OH                | 0.2±0.0        | 0.3±0.0      | 0.5±0.0         | 0.2±0.1        | <LOD           | 0.3±0.1         | 0.6±0.0        | 0.4±0.0        | <LOD            | <LOD         | 0.3±0.0        |
| C16:2                   | 0.1±0.0        | 0.4±0.0      | 1.2±0.0         | 0.1±0.0        | <LOD           | <LOD            | 0.3±0.0        | 0.8±0.1        | 0.1±0.1         | 0.1±0.0      | 0.2±0.0        |
| C16:2-OH                | 0.1±0.1        | 0.1±0.0      | 0.2±0.0         | <LOD           | <LOD           | <LOD            | 0.2±0.0        | <LOD           | <LOD            | <LOD         | <LOD           |
| C18                     | 1.5±0.1        | 2.5±0.1      | 4.7±0.1         | 0.6±0.0        | 0.7±0.0        | 2.3±0.1         | 1.4±0.0        | 3.4±0.2        | 1.4±0.1         | 1.1±0.1      | 3.8±0.2        |
| C18:1                   | 2.5±0.1        | 4.7±0.1      | 19.2±0.1        | 1.5±0.1        | 1.3±0.0        | 1.4±0.1         | 4.6±0.1        | 25.0±0.1       | 2.3±0.1         | 2.0±0.1      | 4.1±0.2        |
| C18:1-OH                | 0.3±0.0        | 0.4±0.0      | 0.7±0.0         | 0.2±0.1        | <LOD           | 0.4±0.0         | 0.9±0.0        | 0.7±0.1        | 0.5±0.0         | 0.2±0.0      | 0.4±0.0        |
| C18:2                   | 0.7±0.0        | 3.3±0.2      | 12.1±0.2        | 0.5±0.0        | 0.2±0.0        | 0.4±0.0         | 1.6±0.1        | 16.4±0.3       | 0.8±0.0         | 0.7±0.0      | 1.5±0.1        |
| Ala                     | 3680.0±475.1   | 781.0±49.6   | 1613.3±178.3    | 330.8±21.8     | 737.3±18.4     | 969.3±41.9      | 888.0±95.7     | 853.5±24.5     | 922.5±38.1      | 1131.2±26.4  | 1393.0±95.2    |
| Arg                     | <LOD           | 60.4±5.0     | 74.1±9.1        | 50.5±4.0       | 75.6±18.0      | 92.0±5.2        | 67.5±10.3      | 24.0±5.2       | 72.8±7.9        | 35.6±4.9     | 94.1±13.3      |
| Asn                     | 113.9±14.3     | 95.9±8.2     | 85.3±5.8        | 34.6±3.4       | 91.0±1.1       | 133.5±6.3       | 88.8±13.0      | <LOD           | 60.0±2.8        | 152.0±7.1    | 108.5±23.1     |
| Asp                     | 247.0±11.0     | 607.0±23.7   | 358.0±44.8      | 222.8±14.0     | <LOD           | 1240.0±92.9     | 2074.0±1020.5  | <LOD           | 870.5±113.5     | 539.2±27.3   | 1021.0±178.8   |
| Cit                     | 38.6±3.5       | 17.3±0.7     | 78.8±5.6        | 46.3±2.6       | 19.2±1.8       | 14.7±7.4        | 63.8±7.5       | 32.2±10.4      | 67.6±3.7        | 7.8±3.1      | 65.6±6.2       |
| Gln                     | 2371.0±427.8   | 914.0±89.3   | 1430.7±103.1    | 826.0±46.7     | 5266.3±499.4   | 2460.3±105.0    | 1809.6±255.0   | 325.5±17.5     | 928.8±89.3      | 2206.4±190.0 | 2080.7±198.5   |
| Glu                     | 1433.0±195.9   | 3067.0±178.8 | 860.0±45.3      | 798.0±27.6     | <LOD           | 3129.8±112.0    | <LOD           | 68.9±4.0       | 2255.5±120.0    | 3339.0±149.1 | 3109.0±1465.6  |
| Gly                     | 2042.0±259.4   | 2406.0±180.6 | 2562.7±165.0    | 637.7±37.4     | 1082.7±63.0    | 1092.5±36.2     | 4452.0±700.6   | 176.0±46.0     | 694.0±42.0      | 2903.6±181.5 | 2034.3±194.2   |
| His                     | 412.5±36.3     | 97.7±11.6    | 185.3±64.9      | 47.8±2.2       | 104.7±8.3      | 86.6±5.5        | 92.4±26.0      | 28.6±6.5       | 94.3±28.5       | 73.0±6.5     | 139.7±10.2     |
| Ile                     | 307.5±24.7     | 140.3±13.0   | 97.7±4.4        | 61.0±3.0       | 55.2±2.8       | 189.3±8.6       | 112.2±15.7     | 152.0±1.0      | 121.3±7.5       | 44.0±4.9     | 170.3±15.2     |
| Leu                     | 535.0±31.5     | 247.8±20.8   | 164.0±15.6      | 112.5±8.7      | 123.0±13.4     | 474.3±24.5      | 212.4±36.6     | 280.5±10.5     | 241.3±25.0      | 79.3±9.8     | 332.0±19.1     |
| Lys                     | 276.5±39.7     | 119.2±14.8   | 183.0±9.4       | 104.9±8.3      | 127.7±11.8     | 163.3±9.9       | 111.36±22.4    | <LOD           | 141.3±15.2      | 121.0±13.4   | 167.7±18.1     |
| Met                     | 48.1±4.9       | 57.3±7.5     | 46.4±1.4        | 27.7±0.9       | 41.4±5.7       | 93.9±6.4        | 47.3±7.6       | 65.3±8.9       | 57.6±7.3        | 36.4±3.0     | 100.2±8.2      |
| Orn                     | 168.3±19.7     | 20.4±3.0     | 23.3±1.9        | 10.8±0.7       | 7.5±0.0        | <LOD            | 21.5±8.8       | <LOD           | 18.7±1.1        | <LOD         | 20.1±1.9       |
| Phe                     | 174.0±19.0     | 99.6±8.4     | 88.5±6.1        | 41.0±2.0       | 66.1±4.1       | 184.8±7.7       | 66.3±8.0       | 83.1±6.7       | 94.3±8.4        | 84.3±6.5     | 151.0±10.7     |
| Pro                     | 358.3±9.0      | 128.5±5.5    | 234.3±5.8       | 73.8±2.9       | 123.0±10.4     | 357.8±18.7      | 105.4±8.4      | 175.5±5.5      | 127.3±10.7      | 351.2±19.2   | 497.7±22.5     |
| Ser                     | 159.0±25.0     | 247.0±22.9   | 250.0±31.0      | 121.8±7.5      | 791.0±50.8     | 271.5±9.2       | 253.0±43.3     | <LOD           | 181.3±19.5      | 352.0±27.4   | 344.7±18.8     |
| Thr                     | 221.0±21.1     | 179.8±8.8    | 168.0±23.2      | 125.8±2.7      | 293.0±6.4      | 235.0±7.4       | 228.0±35.9     | 96.2±8.8       | 208.5±10.4      | 230.8±7.7    | 454.3±24.2     |
| Trp                     | 62.0±5.9       | 51.2±4.7     | 46.4±4.3        | 30.6±1.9       | 27.6±2.7       | 48.5±2.2        | 44.1±5.5       | 30.5±2.0       | 59.9±3.3        | 35.4±3.6     | 85.5±7.2       |
| Tyr                     | 190.3±18.7     | 130.5±14.2   | 110.0±8.6       | 42.2±2.2       | 86.6±5.9       | 157.0±5.6       | 64.2±9.4       | 128.5±2.5      | 132.8±7.3       | 109.0±7.4    | 163.7±12.2     |
| Val                     | 746.0±101.3    | 243.0±27.2   | 234.7±22.2      | 123.5±6.7      | 140.7±13.2     | 342.3±15.3      | 214.2±27.1     | 303.5±16.5     | 260.8±17.1      | 114.4±11.0   | 381.0±41.1     |
| Ac-Orn                  | 14.8±2.7       | 5.8±0.8      | 13.4±0.3        | 4.2±0.3        | 14.2±1.4       | <LOD            | 12.1±2.0       | 9.0±1.1        | 8.2±0.3         | 1.8±0.9      | 14.1±2.7       |
| ADMA                    | 0.9±0.2        | 0.5±0.2      | 0.6±0.3         | 0.9±0.5        | <LOD           | <LOD            | 0.9±0.5        | 2.4±0.6        | <LOD            | <LOD         | 1.3±0.4        |
| alpha-AAA               | 91.5±11.9      | 15.3±1.6     | 4.3±0.7         | 17.5±1.5       | 47.5±9.0       | 9.1±1.7         | 38.9±5.9       | <LOD           | 9.5±2.1         | <LOD         | 37.2±7.1       |
| Carnosine               | 2.2±0.8        | 7.5±0.8      | 444.3±118.7     | 3.4±0.2        | 64.7±22.9      | <LOD            | 3.6±1.3        | 44.1±0.9       | 8.1±0.6         | 1.0±0.4      | 2.6±0.4        |
| Creatinine              | 10.1±0.8       | 15.7±3.9     | 190.0±12.8      | 11.2±0.4       | 81.4±3.5       | <LOD            | 13.4±1.1       | 83.2±5.2       | 23.6±2.0        | 246.6±12.5   | 17.9±0.9       |
| DOPA                    | <LOD           | 1.2±0.5      | <LOD            | <LOD           | <LOD           | <LOD            | <LOD           | <LOD           | <LOD            | 2.1±0.8      | <LOD           |
| Dopamine                | 2.0±0.0        | 2.0±0.1      | <LOD            | <LOD           | 16.7±0.6       | 6.7±0.4         | 2.0±0.8        | <LOD           | 56.3±2.2        | <LOD         | 2.0±0.9        |
| Histamine               | 0.2±0.1        | 1.2±0.1      | 11.3±3.4        | 7.3±2.0        | 0.2±0.1        | 2.5±0.1         | 7.8±2.5        | 23.8±0.3       | 22.8±10.3       | 1.4±0.1      | 14.7±0.9       |
| Kynurenine              | 4.6±0.7        | <LOD         | 1.5±0.1         | 3.8±0.9        | 2.2±1.1        | <LOD            | 2.3±0.5        | 6.2±3.1        | 5.0±2.2         | <LOD         | 2.9±0.3        |
| Met-SO                  | <LOD           | <LOD         | 1.9±0.4         | <LOD           | <LOD           | <LOD            | 6.7±1.1        | 4.8±2.4        | <LOD            | <LOD         | 2.4±0.3        |
| Nitro-Tyr               | <LOD           | <LOD         | <LOD            | <LOD           | <LOD           | <LOD            | <LOD           | <LOD           | <LOD            | <LOD         | <LOD           |
| OH-Pro                  | <LOD           | <LOD         | <LOD            | <LOD           | <LOD           | <LOD            | <LOD           | <LOD           | <LOD            | <LOD         | <LOD           |
| PEA                     | 0.1±0.0        | 0.1±0.0      | <LOD            | <LOD           | <LOD           | 0.3±0.0         | <LOD           | 0.4±0.2        | 0.4±0.2         | <LOD         | <LOD           |



## Metabolomics

| Metabolite abbreviation | Liver          | Kidney      | Skeletal muscle | Fat            | Brain          | Pituitary gland | Lung           | Bone           | Adrenal gland   | Testis       | Ovary          |
|-------------------------|----------------|-------------|-----------------|----------------|----------------|-----------------|----------------|----------------|-----------------|--------------|----------------|
|                         | EtOH/PB<br>1:3 | MeOH<br>1:3 | EtOH/PB<br>1:3  | EtOH/PB<br>1:6 | EtOH/PB<br>1:6 | MeOH<br>1:12    | EtOH/PB<br>1:3 | EtOH/PB<br>1:6 | EtOH/PB<br>1:12 | MeOH<br>1:6  | EtOH/PB<br>1:3 |
| Putrescine              | 4.6±0.4        | 6.5±0.3     | 1.3±0.2         | 1.4±0.1        | 2.0±0.1        | 15.9±0.6        | 4.5±0.4        | 4.8±0.4        | 2.5±0.3         | 5.7±0.1      | 8.3±0.3        |
| Sarcosine               | <LOD           | 488.0±59.9  | 18.4±2.3        | 9.2±1.1        | 84.7±3.6       | <LOD            | 38.6±3.8       | 9.9±1.2        | 15.1±2.2        | 1568.0±627.2 | 18.5±1.6       |
| SDMA                    | <LOD           | <LOD        | <LOD            | <LOD           | <LOD           | <LOD            | <LOD           | <LOD           | <LOD            | <LOD         | <LOD           |
| Serotonin               | 2.3±0.2        | 2.2±0.1     | 0.6±0.0         | 1.9±0.1        | 4.2±0.2        | 2.6±0.2         | 55.2±28.4      | 4.4±0.4        | 7.1±0.3         | 0.4±0.0      | 4.4±0.3        |
| Spermidine              | 50.2±3.8       | 16.9±1.3    | 5.3±0.1         | 7.8±0.3        | 20.7±1.0       | 20.1±8.1        | 40.7±4.6       | 4.5±0.3        | 15.2±0.8        | 12.4±1.5     | 40.8±1.7       |
| Spermine                | 7.2±0.6        | 11.0±1.5    | 3.3±0.3         | <LOD           | 6.6±0.3        | 21.9±10.2       | 8.5±0.6        | 2.5±1.3        | 5.4±2.3         | 6.7±2.1      | 5.5±0.1        |
| Taurine                 | >ULOQ          | >ULOQ       | >ULOQ           | 733.5±371.7    | >ULOQ          | >ULOQ           | >ULOQ          | 4755.0±1667.0  | >ULOQ           | >ULOQ        | >ULOQ          |
| total DMA               | 1.4±0.6        | <LOD        | <LOD            | <LOD           | <LOD           | <LOD            | <LOD           | 6.1±3.1        | <LOD            | <LOD         | 1.4±0.1        |
| lysoPC a C14:0          | <LOD           | <LOD        | <LOD            | <LOD           | <LOD           | <LOD            | <LOD           | <LOD           | <LOD            | <LOD         | <LOD           |
| lysoPC a C16:0          | 208.5±9.0      | 216.0±4.3   | 34.8±0.7        | 56.4±3.5       | 58.6±2.0       | 301.3±11.2      | 210.0±11.4     | 126.0±2.0      | 236.3±4.8       | 61.5±2.6     | 73.9±5.4       |
| lysoPC a C16:1          | 10.8±0.5       | 4.1±0.2     | 1.1±0.0         | 1.5±0.1        | 1.9±0.1        | 3.0±0.3         | 8.4±0.5        | 2.2±0.1        | 3.7±0.2         | 1.0±0.1      | 1.1±0.1        |
| lysoPC a C17:0          | 3.9±0.2        | 3.4±0.3     | 0.7±0.1         | 1.1±0.1        | 0.5±0.0        | 3.6±0.6         | 4.7±0.3        | 2.4±0.0        | 3.5±0.3         | 0.5±0.0      | 1.7±0.1        |
| lysoPC a C18:0          | 59.7±2.5       | 63.7±1.5    | 12.2±0.2        | 39.0±0.6       | 13.9±0.6       | 102.6±5.1       | 96.6±3.7       | 77.0±0.9       | 103.1±4.0       | 16.7±0.9     | 48.1±2.4       |
| lysoPC a C18:1          | 58.2±1.6       | 33.4±0.8    | 5.4±0.2         | 12.2±0.5       | 33.8±2.0       | 33.7±1.6        | 38.6±1.8       | 18.6±0.4       | 42.8±2.1        | 10.1±0.4     | 17.4±1.0       |
| lysoPC a C18:2          | 72.2±2.4       | 53.5±1.0    | 6.5±0.2         | 33.0±1.5       | 1.6±0.1        | 19.2±1.0        | 48.3±2.5       | 38.4±0.9       | 51.6±2.0        | 5.5±0.4      | 28.1±1.9       |
| lysoPC a C20:3          | 6.5±0.3        | 3.2±0.2     | <LOD            | 1.4±0.6        | <LOD           | 2.7±1.2         | 4.1±0.2        | <LOD           | 3.8±0.2         | <LOD         | 1.7±0.1        |
| lysoPC a C20:4          | 41.8±1.5       | 18.4±0.7    | 4.7±0.2         | 8.3±0.2        | 13.2±0.6       | 16.1±0.9        | 24.8±1.4       | 13.2±0.3       | 51.3±2.0        | 6.6±0.3      | 15.1±0.8       |
| lysoPC a C24:0          | <LOD           | <LOD        | <LOD            | <LOD           | <LOD           | <LOD            | <LOD           | <LOD           | <LOD            | <LOD         | <LOD           |
| lysoPC a C26:0          | 2.0±0.8        | <LOD        | 2.1±1.0         | <LOD           | <LOD           | <LOD            | <LOD           | <LOD           | <LOD            | <LOD         | <LOD           |
| lysoPC a C26:1          | <LOD           | <LOD        | <LOD            | <LOD           | <LOD           | <LOD            | <LOD           | <LOD           | <LOD            | <LOD         | <LOD           |
| lysoPC a C28:0          | 1.2±0.5        | <LOD        | <LOD            | <LOD           | <LOD           | <LOD            | <LOD           | <LOD           | <LOD            | 2.1±0.9      | <LOD           |
| lysoPC a C28:1          | 1.3±0.2        | 0.8±0.1     | 1.0±0.4         | <LOD           | 1.4±0.7        | 2.7±1.2         | 0.7±0.1        | <LOD           | 2.7±0.3         | 1.4±0.4      | 0.9±0.2        |
| PCaa C24:0              | 0.6±0.2        | <LOD        | 0.7±0.3         | <LOD           | 0.8±0.4        | 1.5±0.7         | 0.5±0.2        | <LOD           | 1.7±0.1         | 0.9±0.4      | 0.5±0.1        |
| PCaa C26:0              | 6.1±2.6        | <LOD        | <LOD            | <LOD           | <LOD           | <LOD            | <LOD           | <LOD           | <LOD            | <LOD         | <LOD           |
| PCaa C28:1              | 1.4±0.4        | 0.9±0.1     | 0.8±0.3         | 0.6±0.0        | 0.8±0.1        | 2.0±0.2         | 1.0±0.0        | 1.1±0.1        | 1.3±0.1         | 2.0±0.2      | 0.9±0.0        |
| PCaa C30:0              | 7.5±0.3        | 6.3±0.3     | 51.1±0.3        | 10.0±0.3       | 51.5±1.6       | 81.9±2.6        | 197.6±7.7      | 82.1±1.4       | 25.0±0.9        | 16.4±1.0     | 30.2±0.2       |
| PCaa C30:2              | 0.8±0.2        | <LOD        | 0.8±0.1         | 0.1±0.0        | 0.2±0.1        | 0.7±0.2         | 0.8±0.2        | 0.8±0.2        | 1.1±0.2         | 0.2±0.2      | 0.2±0.1        |
| PCaa C32:0              | 94.5±5.2       | 97.5±5.2    | 150.3±3.9       | 152.8±2.3      | 1209.3±37.3    | 1392.8±42.7     | 604.0±10.1     | 756.0±19.0     | 501.8±14.9      | 64.2±3.8     | 291.7±13.2     |
| PCaa C32:1              | 136.8±7.4      | 23.4±1.2    | 177.7±3.1       | 31.1±1.9       | 219.7±9.2      | 198.0±7.0       | 633.2±15.3     | 191.0±5.0      | 93.0±3.6        | 81.5±3.3     | 63.7±0.7       |
| PCaa C32:2              | 33.0±1.7       | 4.1±0.2     | 29.6±0.2        | 3.7±0.1        | 1.1±0.4        | 10.0±0.4        | 54.4±2.7       | 27.6±0.5       | 11.1±0.3        | 2.5±0.1      | 5.3±0.2        |
| PCaa C32:3              | 2.2±0.1        | 0.6±0.1     | 5.6±0.1         | 0.6±0.0        | 0.5±0.1        | 1.4±0.2         | 9.5±0.5        | 5.5±0.1        | 1.2±0.1         | 0.4±0.1      | 0.9±0.0        |
| PCaa C34:1              | 603.8±36.5     | 132.3±5.4   | 476.3±9.0       | 216.8±3.9      | 1582.0±53.7    | 1787.8±57.4     | 433.2±15.1     | 914.0±21.0     | 1265.5±46.9     | 976.2±53.1   | 666.7±32.5     |
| PCaa C34:2              | 894.8±62.2     | 269.3±12.1  | 571.7±6.8       | 452.5±9.8      | 176.3±8.1      | 588.0±23.9      | 450.2±15.9     | 762.5±14.5     | 1051.8±26.2     | 242.4±10.7   | 420.0±15.6     |
| PCaa C34:3              | 259.5±12.7     | 20.2±0.9    | 59.2±1.0        | 22.2±0.5       | 5.9±0.4        | 31.9±1.2        | 42.8±2.2       | 68.2±1.8       | 56.4±1.9        | 12.8±0.4     | 20.5±0.9       |
| PCaa C34:4              | 21.4±0.9       | 2.6±0.2     | 31.3±0.2        | 1.3±0.0        | 1.8±0.1        | 6.7±0.1         | 6.8±0.2        | 18.5±0.2       | 4.6±0.2         | 5.9±0.4      | 3.5±0.2        |
| PCaa C36:0              | 4.0±0.4        | 22.2±1.3    | 24.7±0.5        | 4.6±0.3        | 25.3±2.0       | 10.8±1.4        | 13.7±0.6       | 20.5±1.1       | 16.9±1.6        | 24.7±1.5     | 11.8±0.1       |
| PCaa C36:1              | 48.3±2.5       | 18.4±0.7    | 28.2±0.4        | 138.0±4.7      | 886.7±35.3     | 487.0±15.4      | 67.3±1.5       | 132.5±4.5      | 458.5±9.8       | 129.4±5.0    | 279.3±9.2      |
| PCaa C36:2              | 393.3±19.5     | 88.7±3.9    | 118.0±2.2       | 694.5±12.3     | 427.3±15.8     | 502.5±21.0      | 156.6±6.1      | 432.0±4.0      | 1105.0±37.4     | 196.8±9.7    | 471.3±9.0      |
| PCaa C36:3              | 559.3±28.9     | 94.0±4.8    | 273.7±6.0       | 196.5±2.3      | 93.7±4.8       | 292.0±17.8      | 114.6±5.6      | 315.5±6.5      | 561.8±17.7      | 288.6±11.5   | 202.0±8.5      |
| PCaa C36:4              | 867.0±56.6     | 368.5±11.6  | 784.3±28.0      | 235.3±2.8      | 871.3±25.5     | 1989.3±58.8     | 424.4±14.1     | 1188.0±45.0    | 2090.3±88.1     | 1107.2±62.1  | 651.0±9.8      |
| PCaa C36:5              | 145.0±8.4      | 15.8±0.6    | 99.0±1.5        | 9.1±0.2        | 14.8±0.9       | 34.7±0.9        | 23.9±0.8       | 51.6±1.3       | 40.5±1.7        | 20.9±0.8     | 18.5±0.7       |
| PCaa C36:6              | 8.0±0.5        | 7.1±0.3     | 14.0±0.3        | 0.4±0.0        | 2.2±0.1        | 2.2±0.2         | 2.0±0.1        | 7.6±0.1        | 2.5±0.1         | 2.9±0.2      | 1.2±0.1        |
| PCaa C38:0              | 4.7±0.2        | 32.6±1.4    | 4.3±0.0         | 2.2±0.1        | 5.1±0.3        | 5.8±0.3         | 3.4±0.1        | 17.8±0.5       | 7.6±0.3         | 9.2±0.2      | 10.9±0.1       |

## Metabolomics

| Metabolite abbreviation | Liver          | Kidney      | Skeletal muscle | Fat            | Brain          | Pituitary gland | Lung           | Bone           | Adrenal gland   | Testis      | Ovary          |
|-------------------------|----------------|-------------|-----------------|----------------|----------------|-----------------|----------------|----------------|-----------------|-------------|----------------|
|                         | EtOH/PB<br>1:3 | MeOH<br>1:3 | EtOH/PB<br>1:3  | EtOH/PB<br>1:6 | EtOH/PB<br>1:6 | MeOH<br>1:12    | EtOH/PB<br>1:3 | EtOH/PB<br>1:6 | EtOH/PB<br>1:12 | MeOH<br>1:6 | EtOH/PB<br>1:3 |
| PCaa C38:1              | 1.6±0.3        | 22.7±0.8    | 1.7±0.1         | 1.8±0.8        | 26.6±0.8       | 9.1±0.6         | 2.5±0.2        | 5.8±1.2        | 5.9±0.7         | 1.4±0.2     | 3.8±0.3        |
| PCaa C38:3              | 60.7±1.6       | 16.0±0.5    | 16.5±0.3        | 44.0±2.0       | 38.3±2.4       | 149.0±6.0       | 41.0±1.2       | 107.0±3.0      | 330.3±12.5      | 71.4±4.1    | 91.5±1.4       |
| PCaa C38:4              | 346.5±17.7     | 120.0±5.2   | 219.3±2.9       | 210.3±5.1      | 718.7±26.2     | 1775.8±59.8     | 212.2±9.8      | 533.0±19.0     | 2186.8±83.8     | 513.0±24.3  | 611.7±4.9      |
| PCaa C38:5              | 442.3±19.4     | 132.0±6.7   | 383.0±7.5       | 66.1±0.6       | 319.3±7.3      | 500.5±14.8      | 97.6±3.5       | 319.5±14.5     | 650.5±18.0      | 1252.6±76.9 | 196.3±5.7      |
| PCaa C38:6              | 572.3±37.5     | 360.0±12.8  | 600.0±8.6       | 41.3±0.4       | 668.7±22.5     | 364.0±12.7      | 129.4±5.4      | 473.0±10.0     | 210.3±7.9       | 346.2±17.3  | 165.7±10.1     |
| PCaa C40:1              | <LOD           | <LOD        | <LOD            | <LOD           | 8.5±0.3        | <LOD            | <LOD           | <LOD           | <LOD            | <LOD        | 1.8±0.8        |
| PCaa C40:2              | 0.8±0.1        | 0.8±0.1     | 0.6±0.1         | 0.6±0.1        | 8.8±0.6        | 3.5±0.6         | 1.4±0.1        | 2.8±0.0        | 4.0±0.2         | 1.6±0.1     | 2.8±0.1        |
| PCaa C40:3              | 1.5±0.1        | 1.1±0.1     | 0.9±0.1         | 0.9±0.1        | 1.7±0.1        | 7.8±0.4         | 1.8±0.2        | 5.5±0.4        | 5.7±0.4         | 5.7±0.5     | 3.8±0.0        |
| PCaa C40:4              | 6.3±0.4        | 2.9±0.2     | 7.0±0.2         | 6.4±0.4        | 48.3±2.4       | 116.0±4.3       | 14.3±0.4       | 33.2±0.8       | 85.0±2.3        | 41.7±1.7    | 56.2±2.0       |
| PCaa C40:5              | 23.7±0.9       | 14.3±0.3    | 34.1±1.1        | 12.5±0.5       | 44.7±2.1       | 137.0±4.6       | 18.6±1.4       | 72.0±1.4       | 204.3±7.7       | 182.8±7.8   | 78.8±2.7       |
| PCaa C40:6              | 91.8±5.3       | 47.2±1.9    | 89.2±2.4        | 26.1±0.6       | 327.3±13.0     | 157.8±6.7       | 39.6±1.9       | 141.5±2.5      | 209.0±6.3       | 159.0±6.4   | 98.6±3.1       |
| PCaa C42:0              | 0.4±0.1        | 0.2±0.0     | 0.4±0.2         | <LOD           | 0.6±0.3        | 0.8±0.3         | 0.2±0.1        | 0.9±0.1        | 1.1±0.1         | 0.6±0.1     | 0.3±0.0        |
| PCaa C42:1              | 0.3±0.1        | 0.2±0.0     | 0.4±0.1         | 0.2±0.0        | 4.1±0.3        | 0.6±0.1         | 0.3±0.0        | 1.0±0.1        | 0.7±0.1         | 0.5±0.2     | 0.3±0.0        |
| PCaa C42:2              | 0.5±0.1        | 0.2±0.1     | 0.5±0.2         | 0.2±0.0        | 4.2±0.2        | 0.7±0.1         | 0.6±0.0        | 1.0±0.1        | 1.1±0.1         | 0.7±0.1     | 1.1±0.0        |
| PCaa C42:4              | 0.4±0.0        | 0.5±0.1     | 0.5±0.0         | 0.5±0.0        | 3.6±0.2        | 3.9±0.2         | 1.1±0.1        | 2.1±0.0        | 2.3±0.1         | 4.0±0.2     | 2.0±0.1        |
| PCaa C42:5              | 0.9±0.1        | 1.9±0.1     | 0.9±0.1         | 0.7±0.1        | 3.5±0.2        | 8.5±0.3         | 1.8±0.1        | 6.8±0.1        | 7.4±0.5         | 15.7±0.7    | 4.6±0.1        |
| PCaa C42:6              | 2.6±0.1        | 1.4±0.0     | 2.4±0.3         | 2.2±1.0        | 4.1±0.2        | 9.3±0.2         | 2.5±0.1        | 9.1±1.1        | 13.0±0.5        | 14.3±0.4    | 5.4±0.2        |
| PCae C30:0              | 0.8±0.1        | 1.0±0.1     | 1.5±0.1         | <LOD           | 1.8±0.1        | 3.1±0.4         | 3.9±0.2        | 11.2±0.4       | <LOD            | 6.8±0.4     | 1.1±0.1        |
| PCae C30:1              | 0.9±0.4        | 0.2±0.1     | 1.5±0.4         | 0.3±0.1        | 0.6±0.1        | 1.0±0.3         | 1.6±0.1        | 1.1±0.1        | 0.7±0.1         | 1.5±0.2     | 0.2±0.1        |
| PCae C30:2              | <LOD           | <LOD        | <LOD            | <LOD           | <LOD           | <LOD            | <LOD           | <LOD           | <LOD            | <LOD        | <LOD           |
| PCae C32:1              | 2.8±0.2        | 3.5±0.2     | 9.5±0.1         | 2.2±0.1        | 15.1±0.8       | 16.5±0.9        | 43.9±1.7       | 42.1±0.4       | 9.3±0.5         | 42.3±2.3    | 5.2±0.3        |
| PCae C32:2              | 0.9±0.2        | 1.0±0.1     | 1.8±0.2         | 0.4±0.0        | 1.0±0.1        | 1.6±0.1         | 7.3±0.4        | 3.7±0.2        | 1.3±0.0         | 2.9±0.2     | 0.8±0.1        |
| PCae C34:0              | 2.6±0.2        | 1.5±0.1     | 5.1±0.3         | 3.4±0.1        | 17.4±1.0       | 41.4±2.7        | 9.0±0.2        | 46.7±0.6       | 10.4±0.3        | 0.8±0.2     | 8.4±0.6        |
| PCae C34:1              | 22.6±1.3       | 10.8±0.6    | 23.9±0.6        | 10.4±0.5       | 87.9±4.1       | 77.1±2.0        | 35.4±1.8       | 216.5±0.5      | 31.7±1.1        | 142.0±8.0   | 43.5±0.9       |
| PCae C34:2              | 15.9±0.8       | 10.9±0.4    | 10.4±0.2        | 4.9±0.1        | 12.1±0.4       | 12.8±0.5        | 16.9±0.6       | 134.5±1.5      | 16.2±0.8        | 31.1±1.4    | 13.3±0.5       |
| PCae C34:3              | 2.1±0.1        | 2.8±0.2     | 3.8±0.1         | 1.5±0.0        | 3.5±0.1        | 2.9±0.1         | 6.4±0.3        | 8.2±0.2        | 6.8±0.1         | 2.3±0.2     | 3.1±0.1        |
| PCae C36:0              | 2.2±0.3        | 1.0±0.1     | 1.7±0.2         | 1.2±0.1        | 3.8±0.6        | 7.9±1.4         | 1.9±0.1        | 5.7±0.3        | 3.7±0.1         | 1.1±0.1     | 2.3±0.3        |
| PCae C36:1              | 14.8±0.9       | 3.1±0.1     | 10.3±0.4        | 7.5±0.4        | 39.2±2.1       | 37.2±2.1        | 7.7±0.5        | 22.6±0.2       | 28.7±1.1        | 7.9±0.3     | 19.4±0.5       |
| PCae C36:2              | 29.0±1.0       | 4.4±0.2     | 10.1±0.2        | 14.4±0.4       | 11.0±0.5       | 14.3±0.4        | 8.8±0.4        | 63.7±1.1       | 23.1±1.1        | 14.9±0.7    | 17.5±0.6       |
| PCae C36:3              | 15.2±0.7       | 2.9±0.2     | 4.2±0.1         | 3.1±0.2        | 3.9±0.2        | 3.7±0.1         | 5.5±0.2        | 73.1±0.3       | 7.4±0.3         | 5.2±0.2     | 7.3±0.1        |
| PCae C36:4              | 15.3±1.0       | 34.9±1.5    | 15.8±0.3        | 8.6±0.1        | 8.7±0.2        | 19.5±0.8        | 34.1±1.9       | 184.5±0.5      | 30.8±0.3        | 114.6±5.0   | 39.2±2.2       |
| PCae C36:5              | 5.1±0.3        | 22.7±1.5    | 15.4±0.4        | 7.4±0.2        | 13.8±0.7       | 16.2±0.7        | 46.7±1.5       | 26.0±0.5       | 259.5±11.5      | 26.6±1.0    | 28.8±0.7       |
| PCae C38:0              | 38.8±2.5       | 9.8±0.3     | 39.3±0.1        | 2.3±0.1        | 9.8±0.5        | 7.9±0.7         | 5.1±0.2        | 17.6±0.2       | 7.7±0.4         | 3.8±0.2     | 4.1±0.2        |
| PCae C38:1              | 2.9±0.2        | 0.9±0.0     | 1.6±0.0         | 3.0±0.9        | 5.2±0.3        | 3.9±0.5         | 1.4±0.1        | 3.8±0.1        | 5.1±0.7         | 1.2±0.1     | 2.9±0.2        |
| PCae C38:2              | 9.4±0.3        | 1.4±0.1     | 2.1±0.2         | 10.4±0.6       | 3.7±0.1        | 5.0±0.4         | 2.4±0.2        | 11.0±0.2       | 14.0±0.2        | 1.8±0.1     | 5.5±0.3        |
| PCae C38:3              | 11.2±0.5       | 1.7±0.2     | 4.4±0.6         | 3.5±0.2        | 2.1±0.3        | 5.2±0.8         | 3.0±0.2        | 12.7±0.9       | 10.0±0.8        | 4.0±0.4     | 4.5±0.1        |
| PCae C38:4              | 28.0±1.8       | 9.9±0.5     | 20.0±0.2        | 8.4±0.1        | 13.9±0.8       | 67.6±3.2        | 16.6±0.9       | 79.4±3.1       | 95.3±3.1        | 49.9±2.2    | 48.6±1.8       |
| PCae C38:5              | 18.2±0.9       | 22.9±0.9    | 14.7±0.4        | 7.5±0.3        | 8.2±0.3        | 21.0±0.7        | 23.6±1.4       | 159.5±4.5      | 44.8±1.3        | 264.0±11.7  | 53.7±2.3       |
| PCae C38:6              | 6.8±0.3        | 221.0±10.9  | 22.5±0.7        | 3.0±0.1        | 9.9±0.4        | 10.9±0.7        | 16.5±0.7       | 43.9±1.1       | 5.9±1.4         | 254.2±10.8  | 19.4±0.8       |
| PCae C40:1              | 40.8±1.7       | 26.9±1.1    | 45.4±0.5        | 4.7±0.1        | 12.3±0.7       | 15.3±1.1        | 10.0±0.4       | 40.5±0.8       | 26.2±1.0        | 21.6±0.6    | 16.3±1.0       |
| PCae C40:2              | 2.6±0.1        | 1.2±0.0     | 2.5±0.3         | 1.1±0.0        | 1.5±0.1        | 2.2±0.4         | 0.9±0.1        | 4.4±0.1        | 3.7±0.2         | 1.0±0.1     | 1.2±0.1        |
| PCae C40:3              | 2.4±0.2        | 0.6±0.1     | 0.8±0.2         | 1.1±0.1        | 1.1±0.1        | 3.3±0.5         | 1.1±0.0        | 3.8±0.4        | 4.5±0.3         | 2.2±0.1     | 1.8±0.1        |
| PCae C40:4              | 8.1±0.2        | 2.2±0.0     | 3.4±0.2         | 3.4±0.1        | 3.7±0.2        | 17.8±0.9        | 4.0±0.2        | 19.3±0.2       | 41.6±1.8        | 18.6±1.2    | 9.9±0.3        |

## Metabolomics

| Metabolite abbreviation | Liver          | Kidney      | Skeletal muscle | Fat            | Brain          | Pituitary gland | Lung           | Bone           | Adrenal gland   | Testis      | Ovary          |
|-------------------------|----------------|-------------|-----------------|----------------|----------------|-----------------|----------------|----------------|-----------------|-------------|----------------|
|                         | EtOH/PB<br>1:3 | MeOH<br>1:3 | EtOH/PB<br>1:3  | EtOH/PB<br>1:6 | EtOH/PB<br>1:6 | MeOH<br>1:12    | EtOH/PB<br>1:3 | EtOH/PB<br>1:6 | EtOH/PB<br>1:12 | MeOH<br>1:6 | EtOH/PB<br>1:3 |
| PCae C40:5              | 7.1±0.2        | 2.9±0.3     | 5.4±0.2         | 2.0±0.0        | 3.4±0.2        | 12.3±0.5        | 4.1±0.1        | 19.5±0.4       | 21.5±0.6        | 50.5±2.3    | 12.7±0.2       |
| PCae C40:6              | 9.1±0.5        | 8.8±0.2     | 8.9±0.2         | 1.6±0.4        | 8.2±0.4        | 9.7±0.4         | 3.8±0.2        | 22.2±0.0       | 9.3±0.4         | 26.6±1.0    | 12.7±0.6       |
| PCae C42:0              | 3.5±0.1        | 1.8±0.1     | 1.9±0.1         | <LOD           | 9.5±0.3        | 10.0±0.5        | 2.0±0.1        | 6.3±3.2        | 12.8±0.2        | 5.8±0.2     | 4.7±0.1        |
| PCae C42:1              | 3.3±0.2        | 2.3±0.1     | 2.7±0.2         | 1.1±0.0        | 8.3±0.5        | 11.6±0.5        | 2.3±0.1        | 8.8±0.3        | 29.3±0.7        | 5.5±0.2     | 10.7±0.6       |
| PCae C42:2              | 3.4±0.2        | 1.8±0.1     | 3.5±0.3         | 0.5±0.0        | 4.3±0.2        | 3.3±0.2         | 1.1±0.1        | 4.2±0.2        | 6.9±0.3         | 16.1±0.7    | 2.9±0.0        |
| PCae C42:3              | 7.7±0.5        | 3.8±0.2     | 5.3±0.3         | 1.0±0.1        | 15.2±0.8       | 4.4±0.2         | 2.9±0.1        | 7.0±0.1        | 4.3±0.1         | 7.3±0.2     | 5.3±0.2        |
| PCae C42:4              | <LOD           | <LOD        | <LOD            | <LOD           | <LOD           | <LOD            | <LOD           | <LOD           | <LOD            | <LOD        | <LOD           |
| PCae C42:5              | <LOD           | <LOD        | <LOD            | <LOD           | <LOD           | <LOD            | <LOD           | <LOD           | <LOD            | <LOD        | <LOD           |
| PCae C44:3              | 0.5±0.0        | 0.3±0.0     | 2.4±0.1         | 0.2±0.1        | 2.9±0.2        | 1.3±0.1         | 0.4±0.0        | 1.7±0.2        | 3.4±0.1         | 7.8±0.4     | 1.9±0.1        |
| PCae C44:4              | 0.4±0.1        | 0.3±0.0     | 0.9±0.0         | 0.2±0.0        | 1.4±0.1        | 0.6±0.1         | 0.3±0.0        | 1.3±0.2        | 1.0±0.1         | 3.6±0.2     | 0.6±0.1        |
| PCae C44:5              | 0.7±0.1        | 0.4±0.1     | 0.5±0.1         | 0.2±0.0        | 7.7±0.6        | 0.8±0.1         | 0.5±0.0        | 2.0±0.1        | 1.5±0.2         | 1.6±0.1     | 0.9±0.0        |
| PCae C44:6              | 0.8±0.0        | <LOD        | <LOD            | <LOD           | <LOD           | <LOD            | <LOD           | 2.8±0.1        | 1.4±0.6         | 0.8±0.0     | 0.4±0.2        |
| SM (OH) C14:1           | 4.4±0.1        | 6.2±0.2     | 1.1±0.0         | 2.5±0.3        | 0.2±0.1        | 7.2±0.6         | 7.2±0.3        | 6.4±0.2        | 7.9±0.3         | 4.3±0.2     | 7.0±0.4        |
| SM (OH) C16:1           | 1.1±0.1        | 1.6±0.1     | 2.8±0.2         | 2.3±0.1        | 2.1±0.2        | 12.9±0.6        | 3.3±0.1        | 5.5±0.5        | 6.4±0.3         | 2.1±0.1     | 7.1±0.2        |
| SM (OH) C22:1           | 11.9±0.4       | 2.2±0.1     | 2.8±0.2         | 37.5±3.0       | 1.2±0.1        | 18.0±1.0        | 3.8±0.2        | 12.3±0.8       | 71.0±1.4        | 1.4±0.2     | 10.9±1.3       |
| SM (OH) C22:2           | 5.0 ±0.3       | 1.9±0.1     | 0.9±0.1         | 10.2±0.3       | 1.4±0.1        | 5.5±0.3         | 4.7±0.3        | 5.8±0.1        | 17.2±0.6        | 1.5±0.3     | 5.9±0.5        |
| SM (OH) C24:1           | 0.9±0.0        | 0.5±0.0     | 0.4±0.0         | 2.8±0.1        | 0.3±0.1        | 1.7±0.2         | 0.8±0.1        | 2.1±0.3        | 11.2±0.5        | 0.3±0.1     | 1.3±0.1        |
| SM C16:0                | 80.1±1.5       | 211.0±3.2   | 52.4±0.2        | 152.8±4.0      | 26.1±0.6       | 515.0±17.8      | 296.4±15.2     | 387.0±23.0     | 353.0±8.9       | 720.8±38.5  | 384.0±6.5      |
| SM C16:1                | 3.3±0.1        | 96.0±2.8    | 2.1±0.1         | 10.1±0.3       | 2.2±0.0        | 10.4±0.1        | 25.0±1.8       | 10.7±0.5       | 9.0±0.5         | 6.9±0.3     | 20.5±0.9       |
| SM C18:0                | 5.5±0.6        | 4.5±0.2     | 90.5±2.2        | 34.6±1.0       | 394.0±10.8     | 476.3±12.9      | 29.7±1.0       | 69.3±4.4       | 113.0±3.6       | 23.6±1.5    | 78.8±2.4       |
| SM C18:1                | 0.7±0.1        | 1.8±0.1     | 4.7±0.1         | 5.3±0.3        | 118.7±4.5      | 31.8±0.9        | 8.6±0.3        | 5.3±0.2        | 9.4±0.4         | 2.0±0.1     | 10.7±0.6       |
| SM C20:2                | <LOD           | 0.2±0.1     | 0.0±0.0         | 0.2±0.0        | 0.1±0.1        | 0.3±0.2         | 0.1±0.1        | 0.2±0.1        | 0.2±0.1         | 0.2±0.1     | 0.1±0.0        |
| SM C22:3                | <LOD           | <LOD        | <LOD            | <LOD           | <LOD           | <LOD            | <LOD           | 0.5±0.3        | <LOD            | <LOD        | <LOD           |
| SM C24:0                | 18.7±0.2       | 13.6±0.9    | 6.8±0.2         | 43.0±1.5       | 23.9±1.5       | 73.9±3.4        | 17.2±1.1       | 73.0±6.0       | 120.3±4.8       | 8.3±0.5     | 34.4±2.3       |
| SM C24:1                | 49.3±1.8       | 27.3±1.3    | 17.6±0.5        | 85.6±3.6       | 38.0±0.7       | 204.5±5.9       | 68.0±3.1       | 198.5±13.5     | 242.3±5.4       | 47.1±2.0    | 93.7±3.3       |
| SM C26:0                | 0.2±0.0        | 0.1±0.1     | 0.1±0.0         | 0.4±0.1        | 0.1±0.1        | 0.3±0.2         | 0.2±0.0        | 0.4±0.1        | 0.7±0.1         | <LOD        | <LOD           |
| SM C26:1                | 0.1±0.1        | 0.1±0.0     | 0.1±0.0         | 0.4±0.1        | 0.4±0.1        | 0.4±0.2         | 0.3±0.1        | 1.0±0.3        | 1.0±0.1         | <LOD        | 0.2±0.0        |
| H1                      | 44438.3±1510.6 | 1976.3±79.7 | 1290.7±14.6     | 2005.8±23.6    | <LOD           | 415.8±17.3      | 3381.6±178.7   | 1568.5±39.5    | 3796.0±117.3    | 1569.0±71.1 | 1913.3±90.4    |

## **References**

Salek, R. M., Steinbeck, C., Viant, M. R., Goodacre, R., & Dunn, W. B. (2013). The role of reporting standards for metabolite annotation and identification in metabolomic studies. *GigaScience*, 2(1), 13.
